# Supplementary material for: Direct translation of climbing fiber burst-mediated sensory coding into post-synaptic Purkinje cell dendritic calcium
Source: eLife. 2020 Sep 28;9:e61593. doi: 10.7554/eLife.61593 (PMC7581426; doi:10.7554/eLife.61593)
Supplement: Figure 1—source data 1. [file elife-61593-fig1-data1.xlsx]

## Sheet: Sheet1
Panel f				Panel g			Panel g			Panel g
Synchrony by distance				Frequency			Amplitude by cell			Amplitude by event
Pair number	Distance	Correlation coefficient		Cell nubmer	Frequency (Hz)		Cell nubmer	Amplitude (SD)		Event nubmer	Amplitude (SD)
1	0.0001	0.7984		1	0.733		1	1.94		1	0.7861
2	5.4546	0.6415		2	0.7		2	2.163		2	0.59983
3	7.7274	0.77835		3	0.917		3	1.772		3	6.353
4	8.6365	0.8592		4	0.867		4	2.005		4	1.9718
5	8.6365	0.79985		5	1		5	1.692		5	1.8303
6	8.6366	0.59935		6	0.917		6	1.752		6	0.79397
7	10	0.50964		7	0.7		7	2.229		7	8.278
8	10.909	0.82561		8	0.9		8	1.911		8	3.0992
9	10.909	0.81193		9	1.217		9	1.709		9	1.4364
10	12.727	0.49227		10	1.017		10	1.604		10	1.5165
11	13.182	0.59836		11	0.65		11	2.182		11	0.6983
12	14.091	0.71292		12	0.5		12	2.263		12	0.61398
13	16.364	0.46469		13	0.983		13	1.873		13	0.64249
14	18.182	0.65418		14	0.85		14	2.105		14	0.66424
15	18.637	0.76341		15	1.017		15	1.77		15	1.2617
16	18.637	0.68953		16	0.783		16	2.194		16	1.5789
17	19.546	0.72845		17	0.7		17	2.262		17	1.4704
18	21.818	0.67636		18	0.7		18	2.368		18	0.53339
19	22.727	0.41341		19	0.35		19	3.33		19	1.4261
20	24.091	0.60239		20	1.067		20	2.662		20	1.2128
21	24.091	0.584		21	1.117		21	2.532		21	0.6723
22	25	0.49341		22	2.117		22	1.846		22	3.6368
23	26.818	0.78553		23	1.033		23	2.595		23	1.5447
24	26.818	0.84365		24	1.117		24	2.469		24	2.4283
25	27.273	0.62389		25	1.35		25	2.095		25	2.3566
26	29.091	0.33129		26	0.8		26	3.028		26	0.59122
27	30.455	0.52028		27	0.85		27	2.382		27	2.5846
28	32.728	0.75004		28	0.817		28	2.593		28	1.0343
29	32.728	0.50547		29	0.617		29	2.808		29	4.2539
30	32.728	0.57393		30	0.8		30	2.485		30	2.0663
31	37.728	0.37778		31	0.733		31	2.478		31	0.62437
32	37.728	0.85387		32	0.75		32	2.572		32	1.7935
33	38.182	0.65617		33	0.7		33	2.758		33	3.0374
34	39.091	0.45955		34	0.617		34	2.984		34	5.9306
35	41.364	0.43904		35	0.6		35	2.922		35	0.67472
36	43.182	0.41478		36	0.65		36	2.811		36	4.2772
37	45.455	0.836		37	0.683		37	2.901		37	2.118
38	47.728	0.41562		38	0.783		38	2.609		38	0.71082
39	49.091	0.51764		39	0.683		39	2.517		39	0.53604
40	49.092	0.58744		40	0.633		40	2.868		40	4.4013
41	50.91	0.48105		41	0.867		41	2.509		41	0.61922
42	50.91	0.69412		42	0.817		42	2.723		42	1.5417
43	53.182	0.40931		43	0.917		43	2.328		43	0.61597
44	57.728	0.50366		44	1.033		44	2.256		44	0.54551
45	59.546	0.77078		45	0.967		45	2.283		45	2.334
46	60.91	0.42033		46	0.967		46	2.265		46	2.6809
47	61.819	0.43639		47	0.733		47	2.601		47	1.7301
48	61.819	0.55442		48	0.717		48	2.739		48	3.5183
49	70.455	0.47674		49	0.967		49	2.293		49	1.8359
50	71.819	0.45048		50	0.95		50	2.384		50	0.9648
51	71.819	0.39922		51	0.967		51	2.287		51	1.5216
52	75.455	0.6697		52	0.55		52	3.129		52	4.1273
53	75.91	0.62576		53	0.817		53	2.641		53	1.3153
54	80.455	0.36499		54	1.017		54	2.335		54	2.9998
55	88.637	0.47172		55	0.917		55	2.379		55	0.59435
56	93.637	0.4923		56	0.933		56	2.389		56	1.346
57	98.637	0.41705		57	0.75		57	2.64		57	1.5454
58	102.27	0.59759		58	0.617		58	2.786		58	0.64128
59	102.27	0.69645		59	0.85		59	2.472		59	1.5347
60	113.18	0.70744		60	0.8		60	2.506		60	0.6336
61	120.91	0.58018		61	0.783		61	2.542		61	3.0653
62	126.36	0.44113		62	0.733		62	2.736		62	0.7683
63	135	0.53073		63	0.85		63	2.461		63	2.4714
64	151.36	0.45924		64	0.867		64	2.31		64	3.6989
65	164.09	0.28136		65	0.6		65	2.845		65	2.0134
66	174.09	0.21948		66	0.967		66	2.289		66	0.93312
67	7.7967	0.82864		67	0.583		67	2.84		67	2.1113
68	9.8306	0.31219		68	1.25		68	2.028		68	1.25
69	14.576	0.70849		69	0.967		69	2.327		69	2.9625
70	17.288	0.75707								70	0.6741
71	18.305	0.83131								71	2.9082
72	20	0.20374								72	0.55381
73	22.373	0.80677								73	2.9751
74	26.102	0.78305								74	2.8984
75	27.119	0.2857								75	0.93346
76	34.576	0.30684								76	4.3094
77	35.593	0.75003								77	4.3062
78	40.678	0.78375								78	1.9293
79	42.373	0.25468								79	2.9861
80	43.39	0.73605								80	2.5986
81	45.424	0.26284								81	2.6367
82	53.221	0.32802								82	4.453
83	57.967	0.61496								83	2.9288
84	60.678	0.27129								84	1.8813
85	67.797	0.22129								85	0.92784
86	77.967	0.29692								86	2.3442
87	87.797	0.57449								87	0.66827
88	10.5883	0.786015								88	0.67719
89	16.4707	0.564106								89	0.67324
90	24.706	0.645266								90	5.5403
91	25.8825	0.844621								91	2.8127
92	30.9805	0.468817								92	1.1891
93	36.4708	0.879072								93	1.1244
94	42.3531	0.601968								94	0.59129
95	43.5295	0.55936								95	2.8072
96	47.4512	0.636574								96	3.611
97	52.9415	0.554639								97	1.5779
98	54.1178	0.758284								98	0.70068
99	55.6865	0.459027								99	3.3929
100	72.1572	0.65666								100	0.93345
101	73.3336	0.675641								101	2.4086
102	80.0003	0.66493								102	0.59071
103	83.922	0.588349								103	1.1229
104	96.471	0.619805								104	0.61919
105	98.0396	0.716831								105	1.0462
106	108.628	0.639856								106	0.72654
107	127.451	0.582015								107	2.7084
108	152.157	0.588501								108	1.3126
109	0.90919	0.66195								109	4.3748
110	2.2728	0.61293								110	1.0568
111	3.1819	0.8452								111	0.62905
112	3.182	0.84067								112	3.3532
113	4.091	0.75077								113	0.75768
114	7.2728	0.76044								114	0.73244
115	7.2728	0.82598								115	5.5258
116	9.091	0.64571								116	3.4316
117	10.455	0.77887								117	1.4174
118	11.364	0.74452								118	0.62917
119	12.273	0.64782								119	3.0904
120	14.546	0.80777								120	0.78108
121	15.455	0.78161								121	0.55422
122	15.455	0.74249								122	3.2221
123	16.364	0.77704								123	1.6098
124	16.818	0.80761								124	0.6364
125	17.728	0.79141								125	2.6981
126	18.637	0.73987								126	0.51752
127	20.909	0.65279								127	0.67444
128	21.818	0.65047								128	5.1871
129	23.182	0.68011								129	1.1886
130	24.091	0.68909								130	2.1754
131	24.546	0.56507								131	3.4355
132	24.546	0.81027								132	1.3063
133	25	0.63822								133	0.91712
134	27.273	0.67352								134	1.6687
135	27.727	0.58821								135	1.5946
136	28.182	0.69161								136	0.89579
137	30.909	0.68628								137	1.2296
138	31.818	0.77082								138	0.79361
139	32.273	0.68804								139	0.63332
140	33.182	0.71719								140	3.1558
141	34.091	0.53367								141	0.74769
142	35	0.62755								142	4.8808
143	35.455	0.63575								143	4.0784
144	36.364	0.68093								144	1.0768
145	36.818	0.69511								145	0.90747
146	38.637	0.72655								146	1.1319
147	39.091	0.77791								147	2.0021
148	39.546	0.7627								148	2.4056
149	39.546	0.73673								149	2.1836
150	40	0.70356								150	6.0311
151	41.364	0.85444								151	2.1929
152	42.273	0.73384								152	4.3644
153	42.273	0.77539								153	1.1133
154	43.182	0.68311								154	2.2288
155	43.637	0.7732								155	2.3609
156	47.273	0.69998								156	1.3275
157	48.637	0.79137								157	2.9571
158	54.546	0.78618								158	2.5665
159	55.001	0.74688								159	0.60368
160	55.909	0.80008								160	3.7773
161	56.364	0.69146								161	2.2717
162	56.818	0.74314								162	0.67851
163	57.728	0.83275								163	1.242
164	58.637	0.59424								164	0.96068
165	59.091	0.80628								165	1.2819
166	60	0.69839								166	1.8132
167	60.455	0.69982								167	2.5491
168	61.819	0.61972								168	2.8746
169	64.091	0.71375								169	1.4468
170	65.001	0.69663								170	0.60141
171	66.819	0.59242								171	1.4597
172	67.273	0.66644								172	1.6032
173	67.728	0.67245								173	1.6992
174	69.091	0.60965								174	2.7458
175	70.91	0.68489								175	0.98561
176	71.364	0.66161								176	1.8563
177	71.819	0.66553								177	1.1256
178	72.273	0.70923								178	1.207
179	74.546	0.65863								179	1.6953
180	74.546	0.62592								180	3.1324
181	75.455	0.68571								181	2.4267
182	76.364	0.7011								182	0.90668
183	77.728	0.62772								183	2.0105
184	78.182	0.6744								184	1.7764
185	79.092	0.69184								185	4.1908
186	80.91	0.78369								186	2.2914
187	83.637	0.67019								187	0.70058
188	85.001	0.76965								188	1.7476
189	85.455	0.82026								189	1.6845
190	88.183	0.69976								190	0.84724
191	92.274	0.71724								191	1.6883
192	95.455	0.67427								192	1.3908
193	95.91	0.70373								193	1.1821
194	96.364	0.79921								194	1.9537
195	98.637	0.65576								195	1.4392
196	99.092	0.61733								196	1.3429
197	99.546	0.7199								197	1.2828
198	100	0.72382								198	1.9509
199	100.91	0.5853								199	0.73076
200	102.27	0.58386								200	3.2931
201	102.73	0.70798								201	1.1238
202	103.64	0.69775								202	2.014
203	110	0.69393								203	4.2766
204	110.91	0.70537								204	2.0282
205	111.36	0.66213								205	0.59404
206	112.27	0.67982								206	2.5276
207	114.09	0.67154								207	0.94062
208	114.55	0.61058								208	2.5019
209	117.73	0.63133								209	0.81306
210	123.18	0.63173								210	0.67836
211	126.82	0.71676								211	0.65232
212	127.27	0.59104								212	1.576
213	133.18	0.6005								213	0.71092
214	134.09	0.56959								214	0.5702
215	135.46	0.71313								215	0.95984
216	136.36	0.61063								216	1.0495
217	138.64	0.69502								217	1.4751
218	139.55	0.6772								218	0.86546
219	142.27	0.64616								219	3.009
220	143.18	0.74038								220	0.68128
221	145.46	0.589								221	0.86697
222	150.91	0.72062								222	0.51804
223	157.27	0.61581								223	0.96403
224	161.36	0.54571								224	1.7219
225	166.36	0.66009								225	1.8206
226	170.46	0.64427								226	2.9618
227	172.73	0.62326								227	4.595
228	181.82	0.73744								228	0.76206
229	1.6328	0.80563								229	2.6863
230	4.0817	0.82431								230	2.0507
231	6.5307	0.68613								231	0.63335
232	10.204	0.81532								232	6.4144
233	11.021	0.67593								233	0.62607
234	11.429	0.78873								234	1.4406
235	11.837	0.70815								235	2.1402
236	13.878	0.71418								236	3.888
237	14.286	0.82802								237	0.57806
238	15.51	0.86489								238	2.1964
239	15.918	0.73886								239	1.1232
240	15.918	0.77903								240	2.262
241	15.919	0.77244								241	3.5145
242	17.959	0.74585								242	1.0607
243	21.225	0.71277								243	2.3913
244	22.449	0.79485								244	1.4229
245	22.857	0.77542								245	0.62188
246	24.898	0.69403								246	2.0288
247	29.796	0.70512								247	2.0629
248	31.429	0.7102								248	1.169
249	33.062	0.75279								249	0.56774
250	33.878	0.86517								250	0.68992
251	36.327	0.88385								251	1.2218
252	37.143	0.69328								252	0.87267
253	37.143	0.82255								253	2.6006
254	37.959	0.73192								254	2.6883
255	38.776	0.75483								255	1.4847
256	40.408	0.8251								256	1.6749
257	40.817	0.72409								257	2.8616
258	48.98	0.7817								258	2.17
259	49.388	0.84052								259	1.5198
260	50.613	0.83447								260	0.51169
261	51.021	0.60495								261	2.4925
262	51.837	0.87853								262	4.1419
263	52.245	0.72835								263	0.50468
264	52.653	0.70555								264	2.377
265	53.062	0.82071								265	1.2542
266	55.919	0.82782								266	1.2594
267	62.041	0.67986								267	1.0853
268	62.858	0.72247								268	2.1714
269	63.674	0.7361								269	0.82701
270	66.123	0.82582								270	0.83289
271	66.939	0.7323								271	0.72227
272	67.755	0.73569								272	0.73055
273	67.756	0.74331								273	1.3202
274	71.837	0.7136								274	0.82891
275	73.47	0.79521								275	1.1233
276	73.878	0.71879								276	2.7011
277	74.286	0.75261								277	0.58576
278	77.96	0.78328								278	3.8754
279	78.368	0.76274								279	2.0871
280	82.041	0.70444								280	2.5528
281	83.674	0.61061								281	2.8412
282	85.715	0.87126								282	0.88737
283	88.572	0.74874								283	2.0869
284	88.98	0.77777								284	1.8869
285	89.388	0.79699								285	0.57579
286	89.797	0.83447								286	1.3154
287	90.205	0.66034								287	1.2504
288	100	0.83149								288	0.60538
289	101.63	0.75559								289	0.90583
290	103.27	0.71395								290	5.1879
291	104.9	0.66011								291	1.4289
292	104.9	0.80277								292	0.60647
293	111.43	0.66152								293	1.4925
294	114.29	0.73007								294	1.3892
295	118.78	0.71045								295	3.6124
296	120.82	0.66248								296	0.71316
297	122.86	0.81049								297	1.5775
298	127.35	0.71317								298	2.6876
299	129.8	0.74098								299	0.60838
300	134.69	0.58949								300	4.4672
301	138.78	0.83562								301	1.602
302	141.23	0.65884								302	2.4855
303	145.72	0.64168								303	2.5286
304	152.25	0.65405								304	0.58585
305	152.65	0.7305								305	0.86226
306	163.67	0.75572								306	0.91963
307	1.356	0.67608								307	4.2688
308	4.0679	0.62859								308	0.58942
309	5.7628	0.65533								309	2.5717
310	6.7798	0.61197								310	1.09
311	7.1187	0.64931								311	2.1367
312	7.7967	0.74594								312	3.2246
313	8.8137	0.43273								313	2.793
314	9.1527	0.77025								314	0.69485
315	10.848	0.44514								315	2.8738
316	12.543	0.59003								316	6.1901
317	12.882	0.70012								317	1.8222
318	15.254	0.51468								318	0.72499
319	16.61	0.7359								319	5.3594
320	16.949	0.43481								320	0.96832
321	17.627	0.77416								321	0.86787
322	19.661	0.61554								322	1.1455
323	19.661	0.65879								323	0.86033
324	21.017	0.5009								324	2.0098
325	22.034	0.54796								325	0.71806
326	23.729	0.80355								326	0.81844
327	24.407	0.64031								327	3.0048
328	25.763	0.49547								328	3.2184
329	25.763	0.7063								329	2.3975
330	27.797	0.44753								330	5.3843
331	28.475	0.44472								331	3.6877
332	29.492	0.65637								332	0.89118
333	29.831	0.51755								333	2.4055
334	31.526	0.72854								334	2.1584
335	32.203	0.78013								335	2.017
336	32.882	0.67366								336	3.6148
337	33.56	0.72493								337	1.72
338	34.916	0.59641								338	1.0962
339	36.272	0.6558								339	3.0186
340	36.61	0.42553								340	3.4359
341	37.288	0.66793								341	0.8579
342	37.289	0.61673								342	4.7688
343	38.645	0.5981								343	0.5922
344	40.678	0.4266								344	2.7571
345	41.356	0.79289								345	0.68125
346	44.068	0.60386								346	0.50138
347	45.424	0.59119								347	2.6311
348	49.831	0.66899								348	3.2311
349	51.187	0.6984								349	1.7235
350	51.526	0.57022								350	0.96119
351	54.238	0.4649								351	0.57508
352	57.967	0.68139								352	5.2978
353	58.306	0.46774								353	0.72896
354	58.983	0.72656								354	2.8506
355	59.323	0.55224								355	2.2362
356	60.678	0.47771								356	1.9366
357	60.679	0.53127								357	1.2872
358	62.034	0.5014								358	3.1771
359	65.085	0.67979								359	3.6848
360	69.492	0.60776								360	0.59638
361	69.831	0.56088								361	0.70706
362	70.848	0.58141								362	3.1084
363	70.848	0.61449								363	2.4458
364	75.594	0.61782								364	1.0654
365	77.628	0.58826								365	0.6818
366	78.645	0.6634								366	3.9261
367	82.712	0.6536								367	3.3601
368	86.441	0.53132								368	2.3889
369	86.441	0.56168								369	1.0536
370	87.797	0.49541								370	2.9178
371	88.475	0.54738								371	0.75488
372	90.509	0.52717								372	0.64222
373	91.865	0.53152								373	0.51878
374	92.882	0.57411								374	0.61007
375	93.56	0.55838								375	1.1742
376	95.255	0.6831								376	1.9431
377	95.255	0.57828								377	0.86455
378	95.594	0.56574								378	1.1313
379	99.323	0.45785								379	1.399
380	99.662	0.55571								380	0.61916
381	102.37	0.5598								381	2.0028
382	106.1	0.51272								382	3.871
383	108.14	0.6171								383	1.4374
384	110.51	0.48795								384	0.66687
385	112.2	0.55104								385	2.6438
386	114.92	0.61392								386	0.57707
387	116.27	0.62212								387	1.9922
388	119.32	0.55372								388	2.4998
389	121.36	0.33392								389	2.4722
390	123.39	0.54986								390	1.7072
391	125.09	0.46851								391	0.57636
392	129.15	0.54281								392	2.5349
393	130.17	0.58573								393	2.3783
394	131.87	0.43653								394	3.2674
395	135.93	0.48845								395	0.55253
396	147.12	0.36126								396	1.2482
397	151.19	0.45135								397	2.4979
										398	2.2241
										399	0.82189
										400	1.4768
										401	4.5331
										402	1.4846
										403	3.8953
										404	2.1249
										405	2.3283
										406	1.0027
										407	2.3115
										408	2.4089
										409	2.0434
										410	1.7806
										411	1.4532
										412	0.84975
										413	3.9626
										414	0.96316
										415	3.9164
										416	2.2279
										417	2.1082
										418	1.2304
										419	0.60754
										420	1.2693
										421	2.0233
										422	1.1173
										423	2.5653
										424	0.87715
										425	0.75095
										426	3.2269
										427	0.51659
										428	0.63497
										429	1.4001
										430	0.76857
										431	1.2277
										432	1.998
										433	1.514
										434	0.67301
										435	1.694
										436	1.4155
										437	2.8858
										438	0.72865
										439	3.4956
										440	1.1986
										441	1.8731
										442	2.2932
										443	0.77075
										444	2.8977
										445	2.6854
										446	1.0021
										447	1.2946
										448	1.1522
										449	4.9214
										450	2.2717
										451	3.6023
										452	0.50904
										453	0.71457
										454	2.4171
										455	0.71487
										456	0.91003
										457	2.3981
										458	2.3112
										459	2.4406
										460	1.6283
										461	1.0854
										462	1.221
										463	0.5591
										464	2.4914
										465	1.0998
										466	0.66109
										467	2.8334
										468	1.0533
										469	0.66341
										470	0.60643
										471	4.229
										472	1.5958
										473	0.5165
										474	2.1684
										475	1.2631
										476	0.91755
										477	1.7794
										478	0.50598
										479	0.55031
										480	5.3168
										481	5.407
										482	1.6092
										483	0.59573
										484	0.53299
										485	3.294
										486	0.83513
										487	1.5162
										488	4.993
										489	2.882
										490	1.6404
										491	0.64943
										492	0.94794
										493	0.7211
										494	0.78737
										495	0.81265
										496	0.89926
										497	1.592
										498	4.3391
										499	1.4265
										500	0.65996
										501	0.61649
										502	1.3315
										503	1.4243
										504	0.7109
										505	1.9561
										506	3.5947
										507	1.1966
										508	3.3956
										509	2.5482
										510	5.6214
										511	1.5072
										512	2.4468
										513	0.61813
										514	0.92504
										515	0.70396
										516	0.87905
										517	0.72486
										518	0.62226
										519	3.1593
										520	1.1156
										521	1.907
										522	0.60584
										523	1.2555
										524	1.0455
										525	0.54839
										526	0.50576
										527	1.5502
										528	0.83318
										529	0.57975
										530	0.6246
										531	3.3062
										532	1.7503
										533	0.6737
										534	0.55024
										535	1.4478
										536	0.75029
										537	1.6363
										538	0.67543
										539	4.2916
										540	1.167
										541	2.7789
										542	1.6389
										543	0.50862
										544	0.61081
										545	2.1354
										546	1.1526
										547	0.84368
										548	3.5635
										549	4.6889
										550	1.566
										551	4.3639
										552	4.6167
										553	6.4912
										554	2.128
										555	4.1386
										556	0.98175
										557	1.438
										558	0.5319
										559	2.7246
										560	1.9036
										561	0.82165
										562	0.70072
										563	2.8914
										564	0.57494
										565	0.90372
										566	2.9221
										567	0.83204
										568	3.0179
										569	1.4362
										570	3.6543
										571	1.3675
										572	1.6046
										573	0.90664
										574	2.319
										575	1.0326
										576	1.2781
										577	4.5586
										578	0.5086
										579	0.78324
										580	1.2456
										581	1.6337
										582	2.5787
										583	2.2977
										584	6.5599
										585	0.99237
										586	5.3852
										587	6.6227
										588	0.56966
										589	0.52691
										590	0.59568
										591	3.1822
										592	2.9748
										593	0.78002
										594	2.4095
										595	3.9123
										596	0.52729
										597	3.7754
										598	3.2018
										599	0.5828
										600	0.53113
										601	4.6958
										602	3.4564
										603	0.50434
										604	0.79039
										605	3.7857
										606	1.2283
										607	1.2657
										608	3.0718
										609	0.55174
										610	1.9237
										611	2.043
										612	2.8334
										613	1.4581
										614	1.3591
										615	1.1089
										616	2.1217
										617	1.0104
										618	1.9097
										619	1.9688
										620	1.2583
										621	2.7809
										622	0.97357
										623	1.0035
										624	3.243
										625	3.2645
										626	0.58154
										627	1.7765
										628	1.7513
										629	0.8007
										630	1.0672
										631	0.95514
										632	1.9527
										633	0.70641
										634	1.9908
										635	3.5752
										636	0.5635
										637	0.71845
										638	5.2828
										639	2.8301
										640	0.68288
										641	0.65222
										642	4.6919
										643	2.0976
										644	2.7149
										645	1.0927
										646	1.6996
										647	1.9035
										648	3.6358
										649	0.7505
										650	1.2632
										651	2.8331
										652	0.97273
										653	3.2282
										654	1.4155
										655	3.893
										656	1.8556
										657	0.73311
										658	0.72022
										659	3.2912
										660	1.1617
										661	2.4365
										662	0.77122
										663	2.8406
										664	0.5933
										665	0.84023
										666	3.2725
										667	3.2078
										668	1.5845
										669	1.0546
										670	2.989
										671	0.68437
										672	0.66193
										673	2.8455
										674	1.265
										675	1.3269
										676	2.8071
										677	3.7662
										678	0.86174
										679	2.1183
										680	0.9443
										681	2.0607
										682	2.4079
										683	2.5789
										684	3.0312
										685	2.3109
										686	1.841
										687	0.82181
										688	1.9212
										689	1.193
										690	2.6837
										691	2.1011
										692	1.4016
										693	0.56631
										694	3.6485
										695	1.5761
										696	2.1793
										697	3.9566
										698	3.6993
										699	1.7761
										700	2.2027
										701	1.475
										702	2.6687
										703	2.418
										704	2.0384
										705	1.7402
										706	1.5416
										707	3.253
										708	2.0836
										709	1.0425
										710	2.3051
										711	1.983
										712	2.2403
										713	2.4232
										714	4.9026
										715	1.1903
										716	1.7836
										717	2.2081
										718	1.4258
										719	2.6242
										720	3.0965
										721	1.1954
										722	3.2594
										723	0.72303
										724	1.3637
										725	2.4672
										726	0.83034
										727	1.8513
										728	1.9338
										729	2.3188
										730	0.83284
										731	1.3842
										732	0.71815
										733	2.3172
										734	0.94746
										735	1.8688
										736	0.55678
										737	0.85105
										738	1.8525
										739	2.3658
										740	1.2049
										741	3.4257
										742	2.1746
										743	3.6724
										744	3.2539
										745	1.3764
										746	3.4212
										747	1.6539
										748	3.6321
										749	0.83708
										750	0.80354
										751	3.1759
										752	1.1771
										753	3.2871
										754	1.4801
										755	0.5128
										756	1.4841
										757	3.5651
										758	0.5492
										759	3.8365
										760	1.7983
										761	1.1239
										762	1.1663
										763	0.75221
										764	1.4402
										765	0.67333
										766	0.5063
										767	1.7211
										768	2.8841
										769	0.50584
										770	1.2159
										771	1.903
										772	0.6556
										773	0.9355
										774	0.95705
										775	2.0217
										776	2.5694
										777	1.1796
										778	2.6366
										779	3.2613
										780	1.7151
										781	0.97717
										782	1.4877
										783	0.53553
										784	2.4191
										785	2.959
										786	3.0529
										787	1.9303
										788	1.2145
										789	1.2765
										790	2.0825
										791	4.6518
										792	3.6877
										793	3.1355
										794	0.72253
										795	1.9112
										796	2.7731
										797	1.462
										798	2.8752
										799	1.9335
										800	2.9088
										801	0.56565
										802	5.2892
										803	0.84645
										804	4.2473
										805	3.0789
										806	3.178
										807	2.2283
										808	1.5517
										809	1.4426
										810	2.9609
										811	3.2372
										812	1.7868
										813	1.3546
										814	1.2673
										815	1.2019
										816	2.8655
										817	1.0203
										818	2.3573
										819	1.7129
										820	3.2493
										821	2.6585
										822	1.9616
										823	1.6801
										824	1.1506
										825	1.2444
										826	3.2531
										827	2.5448
										828	3.8155
										829	4.6487
										830	3.1749
										831	1.5853
										832	1.7613
										833	0.80779
										834	2.8484
										835	2.4785
										836	0.92101
										837	1.3018
										838	2.7434
										839	2.5078
										840	1.1974
										841	2.7228
										842	1.1599
										843	0.90782
										844	3.0275
										845	1.4791
										846	4.4054
										847	1.119
										848	1.6998
										849	4.7646
										850	3.1232
										851	1.5629
										852	3.9999
										853	0.86187
										854	2.6351
										855	1.2317
										856	1.8063
										857	1.9465
										858	0.55754
										859	0.58083
										860	2.611
										861	1.4533
										862	1.7638
										863	4.6267
										864	1.6056
										865	2.1693
										866	2.2945
										867	3.289
										868	3.2746
										869	2.4435
										870	1.982
										871	1.1049
										872	3.5073
										873	1.5424
										874	1.7899
										875	3.2364
										876	2.9236
										877	1.786
										878	0.63821
										879	2.8502
										880	3.111
										881	2.9502
										882	2.8447
										883	1.5308
										884	0.74459
										885	2.1142
										886	1.299
										887	2.2601
										888	1.4331
										889	0.96448
										890	3.8636
										891	3.4692
										892	5.4241
										893	1.3702
										894	2.7541
										895	3.1926
										896	2.4815
										897	4.1316
										898	2.5353
										899	1.5706
										900	2.2877
										901	0.99988
										902	0.6347
										903	2.3443
										904	2.0241
										905	3.2319
										906	1.4106
										907	2.2432
										908	3.0078
										909	4.1616
										910	4.6186
										911	5.2616
										912	2.417
										913	2.2752
										914	5.2872
										915	2.4733
										916	0.5664
										917	1.3455
										918	2.3632
										919	8.1611
										920	1.0012
										921	5.3033
										922	3.5352
										923	0.64385
										924	3.5482
										925	4.3682
										926	3.5238
										927	2.3672
										928	3.4227
										929	2.8699
										930	4.5758
										931	0.50892
										932	0.79475
										933	5.2769
										934	2.2958
										935	1.7593
										936	4.158
										937	2.3059
										938	2.7835
										939	2.6338
										940	2.3511
										941	1.5489
										942	3.7195
										943	2.5406
										944	5.2318
										945	3.1658
										946	2.5208
										947	1.9524
										948	0.59173
										949	2.637
										950	3.8128
										951	0.55474
										952	3.386
										953	2.362
										954	2.7611
										955	1.9956
										956	2.7532
										957	3.6497
										958	2.6666
										959	5.0018
										960	1.5187
										961	2.549
										962	3.3173
										963	0.51028
										964	0.79828
										965	5.2778
										966	2.3044
										967	1.7602
										968	4.1589
										969	2.3077
										970	2.7878
										971	2.6437
										972	2.359
										973	1.5583
										974	3.7284
										975	2.5503
										976	5.2488
										977	3.1706
										978	2.5315
										979	1.9628
										980	0.60085
										981	2.6401
										982	3.8142
										983	0.56562
										984	3.3956
										985	2.3716
										986	2.771
										987	1.9974
										988	2.7641
										989	3.6524
										990	2.6666
										991	5.0018
										992	1.5187
										993	2.549
										994	3.3173
										995	0.58212
										996	1.7686
										997	2.7575
										998	1.5612
										999	2.8108
										1000	0.6333
										1001	1.1075
										1002	1.284
										1003	2.9547
										1004	2.968
										1005	4.1471
										1006	5.6079
										1007	4.0507
										1008	1.7558
										1009	0.84412
										1010	2.1906
										1011	0.62832
										1012	1.0631
										1013	3.3428
										1014	3.3184
										1015	5.1384
										1016	4.1217
										1017	3.7362
										1018	3.4322
										1019	2.6443
										1020	4.7802
										1021	3.0696
										1022	2.7401
										1023	2.0953
										1024	3.0552
										1025	2.8125
										1026	0.78281
										1027	2.3257
										1028	0.53562
										1029	0.57826
										1030	1.7539
										1031	2.7356
										1032	1.5392
										1033	2.7224
										1034	0.54071
										1035	0.88339
										1036	1.2475
										1037	2.9328
										1038	2.8854
										1039	4.1325
										1040	5.4115
										1041	4.0361
										1042	1.6515
										1043	0.66602
										1044	2.0964
										1045	0.55076
										1046	0.97827
										1047	3.2292
										1048	3.275
										1049	5.1237
										1050	3.9524
										1051	3.57
										1052	3.1345
										1053	2.6297
										1054	4.6046
										1055	2.9601
										1056	2.6966
										1057	2.0518
										1058	2.8945
										1059	2.638
										1060	0.60461
										1061	2.3037
										1062	2.3278
										1063	2.4482
										1064	0.64774
										1065	4.0405
										1066	2.1538
										1067	2.0023
										1068	1.519
										1069	2.2617
										1070	3.486
										1071	1.2001
										1072	0.93049
										1073	2.3782
										1074	0.8814
										1075	0.85941
										1076	5.2367
										1077	2.7184
										1078	1.0429
										1079	0.63535
										1080	2.4912
										1081	0.55173
										1082	0.53679
										1083	2.3262
										1084	2.2716
										1085	2.2678
										1086	1.6176
										1087	2.1825
										1088	1.7189
										1089	1.051
										1090	1.3978
										1091	0.84634
										1092	0.63292
										1093	2.7453
										1094	1.0835
										1095	2.3406
										1096	1.308
										1097	2.2684
										1098	2.4592
										1099	1.1638
										1100	0.9443
										1101	1.5599
										1102	2.2403
										1103	2.7594
										1104	2.3238
										1105	1.5117
										1106	0.53528
										1107	0.74077
										1108	1.6141
										1109	1.6576
										1110	3.8195
										1111	0.97184
										1112	1.4181
										1113	0.52281
										1114	2.0593
										1115	3.6279
										1116	2.027
										1117	1.8215
										1118	0.76947
										1119	3.7549
										1120	2.2498
										1121	2.4782
										1122	0.76264
										1123	1.6492
										1124	1.0044
										1125	2.3939
										1126	2.4673
										1127	0.73949
										1128	4.0596
										1129	2.3824
										1130	2.0214
										1131	1.5382
										1132	2.3772
										1133	3.5051
										1134	1.2192
										1135	0.97796
										1136	2.4168
										1137	0.91005
										1138	1.0996
										1139	5.4727
										1140	2.7375
										1141	1.0716
										1142	0.683
										1143	2.5198
										1144	0.65508
										1145	0.5935
										1146	2.3643
										1147	2.2907
										1148	2.3345
										1149	1.6463
										1150	0.55602
										1151	2.23
										1152	1.738
										1153	1.0701
										1154	1.4169
										1155	0.88445
										1156	0.66157
										1157	2.9746
										1158	1.2863
										1159	2.4324
										1160	1.4735
										1161	2.2875
										1162	2.6082
										1163	1.183
										1164	1.0899
										1165	1.7945
										1166	2.269
										1167	2.7785
										1168	2.343
										1169	1.5403
										1170	0.76859
										1171	0.86356
										1172	1.6427
										1173	1.6768
										1174	4.0223
										1175	1.2074
										1176	1.6536
										1177	0.58904
										1178	2.116
										1179	3.7367
										1180	2.0585
										1181	1.8407
										1182	0.81695
										1183	3.7741
										1184	0.53236
										1185	2.2498
										1186	2.4782
										1187	0.76265
										1188	1.6492
										1189	0.67069
										1190	0.64561
										1191	3.3093
										1192	2.3095
										1193	2.5772
										1194	3.9249
										1195	3.7559
										1196	3.8069
										1197	1.2012
										1198	5.4921
										1199	2.8231
										1200	3.5526
										1201	1.5127
										1202	4.0306
										1203	1.1921
										1204	2.0922
										1205	1.3881
										1206	0.88554
										1207	1.5325
										1208	2.9274
										1209	1.0617
										1210	2.165
										1211	3.0621
										1212	4.6027
										1213	1.889
										1214	2.3328
										1215	3.4039
										1216	2.3259
										1217	3.2794
										1218	2.6004
										1219	3.9344
										1220	0.66569
										1221	3.3152
										1222	2.3575
										1223	2.5811
										1224	3.9289
										1225	3.7618
										1226	3.8274
										1227	1.2399
										1228	5.496
										1229	2.8468
										1230	3.5714
										1231	1.5167
										1232	4.0345
										1233	1.1999
										1234	2.1395
										1235	1.4305
										1236	0.90462
										1237	1.5365
										1238	2.9313
										1239	1.0822
										1240	2.1689
										1241	3.1156
										1242	4.6066
										1243	0.50774
										1244	1.9371
										1245	2.3368
										1246	3.4078
										1247	2.3259
										1248	3.2794
										1249	2.6004
										1250	3.9344
										1251	2.6109
										1252	0.99304
										1253	5.0652
										1254	1.8274
										1255	0.8094
										1256	3.0581
										1257	5.2311
										1258	0.51445
										1259	3.4227
										1260	0.74111
										1261	2.4891
										1262	2.308
										1263	1.5434
										1264	3.0971
										1265	1.3678
										1266	0.56357
										1267	3.0902
										1268	3.893
										1269	2.899
										1270	1.6081
										1271	1.6671
										1272	2.2215
										1273	3.0111
										1274	2.7536
										1275	4.293
										1276	5.5198
										1277	1.9575
										1278	1.6752
										1279	4.3499
										1280	2.5835
										1281	0.55576
										1282	2.0636
										1283	2.4598
										1284	2.6146
										1285	0.99851
										1286	5.0707
										1287	1.8329
										1288	0.83506
										1289	3.0617
										1290	5.2753
										1291	0.52701
										1292	3.4264
										1293	0.77038
										1294	2.4927
										1295	2.3117
										1296	1.556
										1297	3.1177
										1298	1.412
										1299	0.60749
										1300	3.1341
										1301	3.8967
										1302	0.52078
										1303	2.9026
										1304	1.6301
										1305	1.7091
										1306	2.2665
										1307	3.0147
										1308	2.7573
										1309	4.2966
										1310	5.5198
										1311	1.9575
										1312	1.6752
										1313	4.3499
										1314	2.5835
										1315	0.55576
										1316	2.0636
										1317	2.4598
										1318	0.65763
										1319	0.60207
										1320	5.2118
										1321	0.52258
										1322	4.6637
										1323	0.71761
										1324	4.0029
										1325	1.9793
										1326	2.1014
										1327	1.3081
										1328	0.60334
										1329	2.7634
										1330	4.6926
										1331	0.82277
										1332	1.2737
										1333	2.0497
										1334	4.8886
										1335	4.5661
										1336	2.9992
										1337	0.76918
										1338	0.5282
										1339	0.7802
										1340	2.1591
										1341	1.1241
										1342	1.8152
										1343	2.7295
										1344	2.3969
										1345	1.433
										1346	2.4088
										1347	1.4514
										1348	1.5707
										1349	0.94272
										1350	3.0446
										1351	1.2526
										1352	0.7919
										1353	2.3046
										1354	3.2289
										1355	3.1427
										1356	0.72309
										1357	2.1989
										1358	1.5139
										1359	0.69141
										1360	5.2179
										1361	0.59213
										1362	4.6698
										1363	0.74715
										1364	4.009
										1365	2.0061
										1366	2.1252
										1367	1.3232
										1368	0.63253
										1369	2.7695
										1370	4.6987
										1371	0.83189
										1372	1.2828
										1373	2.1134
										1374	4.8947
										1375	4.5752
										1376	3.0229
										1377	0.77829
										1378	0.54928
										1379	0.80428
										1380	2.1652
										1381	1.1706
										1382	1.8587
										1383	2.7631
										1384	2.403
										1385	1.5004
										1386	2.4149
										1387	1.5253
										1388	1.5768
										1389	1.0141
										1390	3.0507
										1391	1.3109
										1392	0.79183
										1393	2.3046
										1394	3.2289
										1395	3.1427
										1396	0.72309
										1397	2.1989
										1398	1.5139
										1399	3.22
										1400	1.9043
										1401	0.59511
										1402	2.7201
										1403	7.0242
										1404	1.0108
										1405	0.652
										1406	3.8904
										1407	3.72
										1408	0.64214
										1409	3.2588
										1410	2.2061
										1411	4.3312
										1412	3.2727
										1413	3.8665
										1414	2.756
										1415	2.1456
										1416	5.0179
										1417	0.97198
										1418	2.1494
										1419	3.841
										1420	2.0988
										1421	5.9244
										1422	5.5849
										1423	3.199
										1424	1.8986
										1425	0.56369
										1426	2.7144
										1427	7.0148
										1428	1.0014
										1429	0.6322
										1430	3.8706
										1431	3.7162
										1432	0.63085
										1433	3.2531
										1434	2.2023
										1435	4.3083
										1436	3.2263
										1437	3.8478
										1438	2.7522
										1439	2.1418
										1440	5.0141
										1441	0.96819
										1442	2.1456
										1443	3.8334
										1444	2.095
										1445	5.9064
										1446	5.5811
										1447	3.7651
										1448	2.5746
										1449	3.9747
										1450	0.59904
										1451	0.61416
										1452	4.0437
										1453	0.85805
										1454	0.84559
										1455	0.98427
										1456	4.1225
										1457	0.57018
										1458	2.2949
										1459	0.57229
										1460	1.4509
										1461	2.7309
										1462	1.1826
										1463	2.788
										1464	2.2162
										1465	1.2067
										1466	6.4968
										1467	1.086
										1468	2.8403
										1469	1.2251
										1470	3.3976
										1471	1.3529
										1472	1.9016
										1473	0.91425
										1474	4.6303
										1475	1.5105
										1476	3.6451
										1477	3.0385
										1478	1.0011
										1479	3.6666
										1480	5.1744
										1481	3.1587
										1482	1.9211
										1483	1.2024
										1484	0.83462
										1485	3.6276
										1486	0.84931
										1487	4.4837
										1488	0.83611
										1489	5.3119
										1490	2.4104
										1491	1.3703
										1492	1.9787
										1493	5.068
										1494	0.63149
										1495	1.2781
										1496	0.60228
										1497	6.628
										1498	0.51952
										1499	4.9686
										1500	1.8614
										1501	1.2795
										1502	2.944
										1503	1.4203
										1504	0.61756
										1505	4.2134
										1506	0.67138
										1507	0.98528
										1508	3.2717
										1509	3.2018
										1510	4.0382
										1511	1.7405
										1512	3.0257
										1513	1.8171
										1514	0.99721
										1515	3.2825
										1516	0.87339
										1517	4.1842
										1518	0.75265
										1519	1.3245
										1520	0.64793
										1521	7.1737
										1522	3.7392
										1523	0.6218
										1524	2.6159
										1525	2.9595
										1526	3.3292
										1527	2.7407
										1528	2.0169
										1529	6.7893
										1530	0.61447
										1531	0.76579
										1532	3.0356
										1533	2.3267
										1534	1.531
										1535	4.1217
										1536	5.3467
										1537	1.1648
										1538	2.8326
										1539	0.97432
										1540	5.2207
										1541	3.5029
										1542	3.5713
										1543	0.73232
										1544	5.1683
										1545	3.8668
										1546	1.6615
										1547	5.0247
										1548	0.90822
										1549	2.4784
										1550	1.518
										1551	1.257
										1552	4.1363
										1553	2.1418
										1554	3.3024
										1555	4.2724
										1556	0.5264
										1557	1.3859
										1558	2.4439
										1559	2.0432
										1560	3.1484
										1561	2.666
										1562	5.8192
										1563	1.2773
										1564	0.58639
										1565	0.53916
										1566	0.59096
										1567	0.60344
										1568	3.5371
										1569	0.84438
										1570	1.9774
										1571	7.0976
										1572	0.90385
										1573	6.6954
										1574	4.2935
										1575	3.8968
										1576	1.7554
										1577	4.5931
										1578	0.60446
										1579	5.7035
										1580	3.6623
										1581	2.9461
										1582	2.3976
										1583	6.3236
										1584	4.8276
										1585	2.8925
										1586	3.2086
										1587	3.2589
										1588	0.55884
										1589	0.642
										1590	5.0662
										1591	0.89853
										1592	1.943
										1593	3.6495
										1594	5.6274
										1595	3.0184
										1596	2.6822
										1597	1.4624
										1598	3.4773
										1599	0.99813
										1600	0.58172
										1601	0.65539
										1602	2.5717
										1603	0.71031
										1604	0.58957
										1605	1.7051
										1606	5.2398
										1607	3.2132
										1608	5.0798
										1609	1.9244
										1610	2.9246
										1611	0.59036
										1612	0.96497
										1613	4.6475
										1614	1.2938
										1615	0.66384
										1616	1.1561
										1617	4.7336
										1618	3.0617
										1619	0.59868
										1620	2.005
										1621	0.74738
										1622	1.0941
										1623	6.7636
										1624	0.67218
										1625	2.03
										1626	4.8024
										1627	4.0286
										1628	2.9574
										1629	3.7714
										1630	0.64697
										1631	2.6594
										1632	0.62889
										1633	4.8401
										1634	1.0717
										1635	3.3763
										1636	4.0991
										1637	3.4694
										1638	1.8306
										1639	5.5384
										1640	0.59039
										1641	3.4173
										1642	0.60323
										1643	0.88467
										1644	5.0349
										1645	0.65781
										1646	2.7282
										1647	3.645
										1648	2.0834
										1649	1.3375
										1650	0.97233
										1651	4.5236
										1652	0.62756
										1653	1.1421
										1654	5.8641
										1655	2.5634
										1656	3.18
										1657	6.8532
										1658	0.78225
										1659	1.7603
										1660	0.79738
										1661	2.5559
										1662	0.69267
										1663	3.4961
										1664	2.9286
										1665	1.074
										1666	0.73014
										1667	1.2496
										1668	4.2854
										1669	1.1794
										1670	1.4681
										1671	5.3925
										1672	2.3708
										1673	1.3281
										1674	0.59546
										1675	4.794
										1676	3.273
										1677	3.9862
										1678	1.2197
										1679	3.5687
										1680	3.5984
										1681	0.75573
										1682	3.5213
										1683	2.3675
										1684	2.7732
										1685	2.8323
										1686	3.5133
										1687	3.1289
										1688	2.7133
										1689	1.1603
										1690	3.4293
										1691	2.8949
										1692	0.69047
										1693	1.3706
										1694	0.61989
										1695	3.961
										1696	2.5087
										1697	0.92328
										1698	0.58919
										1699	3.1729
										1700	3.3887
										1701	6.8102
										1702	2.082
										1703	4.496
										1704	3.6652
										1705	0.99786
										1706	4.1704
										1707	0.68958
										1708	6.1851
										1709	1.0206
										1710	1.4909
										1711	4.5814
										1712	2.1335
										1713	1.1827
										1714	1.5382
										1715	4.0992
										1716	3.4936
										1717	5.2501
										1718	3.9073
										1719	2.5113
										1720	4.8092
										1721	0.97899
										1722	3.4562
										1723	2.8922
										1724	4.9509
										1725	2.4444
										1726	3.1924
										1727	0.82025
										1728	1.2853
										1729	4.9896
										1730	1.9077
										1731	1.2408
										1732	0.80057
										1733	3.3605
										1734	1.062
										1735	2.8406
										1736	4.2726
										1737	2.6091
										1738	4.1229
										1739	5.5265
										1740	5.0722
										1741	3.0473
										1742	2.8751
										1743	0.53515
										1744	2.7641
										1745	0.51586
										1746	7.1556
										1747	5.5313
										1748	3.4553
										1749	2.4921
										1750	2.3555
										1751	3.358
										1752	0.61476
										1753	5.8357
										1754	0.83007
										1755	3.5916
										1756	3.6124
										1757	4.0034
										1758	3.9024
										1759	1.1793
										1760	5.0914
										1761	0.64169
										1762	3.1964
										1763	1.6025
										1764	3.686
										1765	2.6102
										1766	5.1305
										1767	1.6094
										1768	3.0327
										1769	1.4449
										1770	1.4297
										1771	4.5449
										1772	1.9773
										1773	5.0699
										1774	2.1451
										1775	1.8931
										1776	1.9129
										1777	3.7461
										1778	3.5016
										1779	4.1355
										1780	2.9056
										1781	0.84579
										1782	3.2211
										1783	1.6716
										1784	4.6983
										1785	2.392
										1786	2.1358
										1787	2.6372
										1788	1.6702
										1789	3.0745
										1790	5.2506
										1791	4.1023
										1792	1.9503
										1793	0.81884
										1794	6.4995
										1795	0.59773
										1796	0.61451
										1797	3.232
										1798	3.3908
										1799	2.5927
										1800	3.8588
										1801	1.0234
										1802	3.8834
										1803	3.321
										1804	4.0505
										1805	6.7223
										1806	0.98401
										1807	0.60912
										1808	5.7863
										1809	0.64164
										1810	1.3027
										1811	0.98463
										1812	2.6637
										1813	2.4533
										1814	1.1189
										1815	0.70082
										1816	3.2601
										1817	1.825
										1818	4.8004
										1819	1.0744
										1820	6.4978
										1821	1.3749
										1822	2.2165
										1823	2.9768
										1824	4.312
										1825	0.50759
										1826	4.3975
										1827	1.9769
										1828	3.3837
										1829	7.1049
										1830	3.1283
										1831	3.5211
										1832	4.6166
										1833	3.4791
										1834	0.5826
										1835	3.3968
										1836	1.4564
										1837	4.3902
										1838	5.5817
										1839	3.583
										1840	1.714
										1841	0.50869
										1842	3.4766
										1843	3.6216
										1844	3.1132
										1845	2.0242
										1846	4.367
										1847	2.2315
										1848	4.0854
										1849	2.3982
										1850	4.4094
										1851	2.7751
										1852	3.1174
										1853	1.6669
										1854	0.57199
										1855	3.471
										1856	0.94717
										1857	4.0869
										1858	3.4021
										1859	1.7554
										1860	2.2317
										1861	2.1914
										1862	1.4359
										1863	6.581
										1864	0.55877
										1865	1.3614
										1866	3.8221
										1867	0.90923
										1868	3.5435
										1869	3.9541
										1870	4.887
										1871	5.16
										1872	2.9325
										1873	6.0385
										1874	3.6342
										1875	2.1889
										1876	2.2959
										1877	1.2028
										1878	2.2908
										1879	1.0959
										1880	2.6181
										1881	2.4679
										1882	6.2987
										1883	0.73
										1884	1.5599
										1885	1.3523
										1886	1.6555
										1887	4.4213
										1888	3.8152
										1889	1.2836
										1890	2.202
										1891	3.5626
										1892	2.9634
										1893	1.3959
										1894	2.1701
										1895	1.7464
										1896	0.51669
										1897	1.2924
										1898	4.5815
										1899	1.1885
										1900	4.869
										1901	1.7911
										1902	3.2538
										1903	3.541
										1904	1.7524
										1905	3.1301
										1906	5.4113
										1907	1.4248
										1908	2.9453
										1909	3.5931
										1910	1.0671
										1911	1.8145
										1912	4.2126
										1913	1.2949
										1914	0.56758
										1915	0.54509
										1916	5.8527
										1917	0.90803
										1918	0.93138
										1919	0.70331
										1920	2.5826
										1921	4.5209
										1922	5.776
										1923	1.5856
										1924	4.363
										1925	3.9056
										1926	0.56256
										1927	1.4869
										1928	1.0288
										1929	1.4276
										1930	1.339
										1931	5.1418
										1932	0.89387
										1933	2.9187
										1934	1.295
										1935	0.57848
										1936	4.6918
										1937	5.1366
										1938	0.96354
										1939	0.68402
										1940	0.51452
										1941	0.72544
										1942	2.9616
										1943	0.84262
										1944	3.9102
										1945	3.2481
										1946	2.8492
										1947	6.3543
										1948	0.66043
										1949	1.8876
										1950	2.5834
										1951	2.4767
										1952	0.71966
										1953	4.1413
										1954	2.3487
										1955	2.1586
										1956	6.2459
										1957	2.3945
										1958	3.6503
										1959	4.5414
										1960	4.0498
										1961	6.0355
										1962	3.0349
										1963	2.0239
										1964	3.134
										1965	3.6541
										1966	1.1771
										1967	3.0876
										1968	4.5597
										1969	5.0716
										1970	0.69458
										1971	1.0908
										1972	3.6989
										1973	4.2503
										1974	1.8415
										1975	0.74773
										1976	3.9978
										1977	4.2141
										1978	1.1558
										1979	2.7513
										1980	0.54229
										1981	1.6898
										1982	3.5767
										1983	1.1554
										1984	4.2997
										1985	4.5306
										1986	0.72833
										1987	0.51393
										1988	6.1354
										1989	1.9905
										1990	1.8569
										1991	0.84932
										1992	6.916
										1993	2.4382
										1994	0.92847
										1995	0.56525
										1996	5.4574
										1997	1.033
[truncated: 1,484 more rows]
