# Supplementary material for: Direct translation of climbing fiber burst-mediated sensory coding into post-synaptic Purkinje cell dendritic calcium
Source: eLife. 2020 Sep 28;9:e61593. doi: 10.7554/eLife.61593 (PMC7581426; doi:10.7554/eLife.61593)
Supplement: Figure 2—source data 1. [file elife-61593-fig2-data1.xlsx]

## Sheet: Sheet1
Panel c
Raw CF calcium amplitudes							Relative CF calcium amplitudes
Cell	1 stim	3 stim	5 stim	7 stim	9 stim		Cell	1 stim	3 stim	5 stim	7 stim	9 stim
1	6.59118	7.94399	13.255	15.9706	19.503		1	100	120.525	201.102	242.303	295.895
2	3.66024	8.54057	12.7298	14.0045	15.1645		2	100	233.333	347.786	382.612	414.303
3	4.00013	8.69998	16.6201	21.1063	21.8799		3	100	217.493	415.489	527.639	546.979
4	5.06015	12.9586	20.8861	25.2166	25.6189		4	100	256.092	412.756	498.337	506.287
5	1.2171	2.7908	4.22499	5.38599	4.88795		5	100	229.299	347.136	442.527	401.607
6	2.24713	3.59529	7.60744	9.58978	9.93276		6	100	159.995	338.54	426.756	442.019
7	3.7906	3.73279	5.89072	9.25722	10.1155		7	100	98.4751	155.404	244.215	266.858
8	3.42757	6.67479	10.0562	12.3269	12.0813		8	100	194.738	293.39	359.641	352.474
9	2.36944	6.67283	8.95058	9.92862	9.5086		9	100	281.621	377.751	419.028	401.302
panel e
In vivo CF Ca2+ amplitudes (normalized by median), descend sorted
Event \ Cell	1	2	3	4	5	6	7	8	9	10	11	12	13	14	15	16	17	18	19	20	21	22	23	24	25	26	27	28	29	30	31
1	6.8221	5.8004	8.2476	6.1921	6.2121	5.9885	6.1555	6.8267	9.0009	9.0595	7.0487	6.3148	6.2391	7.695	7.0668	5.4401	5.9864	6.0759	6.4636	6.7557	7.2637	7.6072	7.0591	5.275	5.8001	5.8301	6.9485	6.5134	5.427	6.0405	6.3911
2	5.681	5.6248	6.8509	5.8847	6.1819	5.8017	5.8978	5.5897	7.3004	7.8318	6.5311	6.0635	5.7176	5.5338	6.8166	5.0748	5.4331	5.9844	5.2763	6.5691	6.5691	6.609	6.2003	4.8699	5.5109	5.7907	5.5934	5.3077	5.1987	5.2152	5.2005
3	5.6739	5.2993	6.1706	5.1405	5.9449	5.2211	5.4116	5.5564	6.8653	7.3166	6.4439	5.732	5.5958	5.4976	5.4949	5.0731	5.1933	5.7665	4.4531	5.7817	6.0906	6.3824	6.1934	4.652	5.3423	5.4206	5.5726	5.0582	4.4259	4.828	5.1029
4	5.4774	5.194	6.1597	4.9318	5.1133	4.7978	5.2918	5.5179	5.7796	7.2177	5.8684	5.4756	5.0324	5.3839	5.1036	4.8696	4.9038	5.4873	4.3553	5.7742	5.9909	5.8399	5.8295	4.4928	4.953	5.2886	5.2841	4.8593	4.3813	4.7781	5.0927
5	5.3535	4.9539	5.3339	4.8427	5.0818	4.6272	5.2578	5.2705	5.4845	7.108	5.7735	5.4123	4.9939	5.3766	4.7509	4.6534	4.7996	5.3252	4.3445	5.7302	5.706	5.3488	5.3245	4.3828	4.7386	4.8974	5.236	4.5359	4.3236	4.6369	4.4159
6	4.8349	4.9079	5.2618	4.809	4.769	4.5796	5.1245	5.0761	5.4618	7.0601	5.6167	5.1882	4.9245	5.275	4.7232	4.3088	4.7366	5.2191	4.3373	5.457	5.53	4.9646	5.3152	4.3397	4.5771	4.7895	5.1617	4.5278	4.254	4.5435	4.4124
7	4.8089	4.7932	4.9709	4.7875	4.7373	4.5382	5.0902	4.9676	5.1372	6.1502	5.3057	5.1501	4.7786	5.2539	4.6301	4.2302	4.6291	5.0673	4.3278	5.3372	5.4094	4.7455	5.2369	4.3366	4.5452	4.7099	4.8589	4.4686	4.2529	4.4241	4.3135
8	4.7938	4.4731	4.6167	4.5916	4.6888	4.4498	4.8977	4.8435	5.1345	5.9818	5.2216	5.1106	4.7778	5.2414	4.5284	4.0458	4.466	5.0263	4.2734	5.2779	5.1815	4.5875	5.1637	4.0893	4.4275	4.6524	4.7195	4.4098	4.2029	4.2601	4.3123
9	4.4651	4.464	4.5268	4.5885	4.4201	4.4263	4.7953	4.7722	5.0213	5.9759	5.1634	4.947	4.7647	5.198	4.2532	4.0108	4.2523	4.9598	4.1363	5.215	5.157	4.3984	5.0485	4.0532	4.3869	4.5211	4.6954	4.3193	4.1105	4.2232	4.2892
10	4.4583	4.2086	4.3677	4.5847	4.3631	4.3984	4.6834	4.6189	4.9128	5.8772	5.1529	4.8237	4.756	5.1119	4.1475	3.8507	4.1354	4.6433	4.1295	5.2024	5.1371	4.2394	5.0394	3.9912	4.3693	4.5191	4.6073	4.1675	3.8921	3.9069	4.255
11	4.4056	4.1084	4.2933	4.5363	4.2853	4.3775	4.5496	4.5882	4.7673	5.7812	5.1473	4.6525	4.597	4.8843	4.0988	3.7788	4.117	4.61	4.1153	5.0971	5.0213	4.1951	4.8143	3.9902	4.2616	4.5109	4.5439	4.1453	3.8879	3.8989	4.2533
12	4.2949	3.9898	4.2491	4.4265	4.2337	4.374	4.3111	4.5682	4.5616	5.598	5.0992	4.6266	4.4482	4.697	4.0666	3.7727	3.9705	4.5802	4.0672	5.0759	4.933	3.905	4.7082	3.951	4.2529	4.4723	4.4323	3.9287	3.8264	3.898	4.1678
13	4.2633	3.971	4.0966	4.3938	4.1844	4.2994	4.2233	4.5349	4.5064	5.5036	5.0944	4.2463	4.3663	4.5552	4.0531	3.6821	3.96	4.2781	4.0612	5.047	4.6451	3.8698	4.5262	3.926	4.1948	4.443	4.3006	3.7842	3.8251	3.8899	4.128
14	4.2602	3.8478	3.7294	4.3894	4.1447	4.2805	4.1784	4.517	4.4213	5.452	4.9757	4.1928	4.2568	4.4146	3.948	3.49	3.9309	4.184	3.9632	5.0009	4.503	3.833	4.4995	3.8897	4.0793	4.3667	4.2917	3.6983	3.7937	3.8772	4.1127
15	4.2248	3.8258	3.6278	4.2816	4.1144	4.2781	4.1033	4.3186	4.1529	5.267	4.8876	4.1138	4.1743	4.3606	3.931	3.476	3.9169	4.0496	3.9257	4.9182	4.4817	3.8319	4.3512	3.8215	3.9769	4.3561	4.2486	3.6513	3.764	3.7922	4.0883
16	4.1749	3.7952	3.5872	4.0939	4.0935	4.2254	3.9576	4.3122	4.1279	5.2059	4.857	4.0766	4.0527	4.3233	3.8148	3.4702	3.7601	3.8887	3.8861	4.8414	4.3022	3.7747	4.2755	3.7824	3.917	4.3275	4.1861	3.5606	3.7639	3.726	4.0711
17	4.1557	3.7837	3.5682	4.0687	4.0607	4.1	3.9143	4.281	4.1033	5.1296	4.7295	4.0128	4.0475	4.2141	3.8018	3.3539	3.7264	3.8738	3.8463	4.7633	4.1645	3.7512	4.1489	3.747	3.9017	4.2989	4.1484	3.5516	3.7179	3.6723	4.0182
18	4.1337	3.7605	3.4749	3.8564	4.0464	4.0936	3.8582	4.2541	4.0916	5.0509	4.5564	3.9864	4.039	4.2017	3.7533	3.304	3.6275	3.8446	3.8124	4.7013	4.1392	3.747	4.1235	3.6996	3.9008	4.28	4.1408	3.5319	3.7128	3.6634	4.0147
19	4.0395	3.7452	3.439	3.8223	3.9656	3.9902	3.699	4.2219	4.0489	4.9327	4.5224	3.976	3.9633	4.1188	3.7523	3.2656	3.6212	3.7377	3.7473	4.6769	4.1105	3.5972	4.0613	3.6129	3.8503	4.2336	4.13	3.5288	3.6802	3.6075	3.9306
20	4.0255	3.7188	3.4266	3.743	3.9506	3.7467	3.6691	4.2104	3.9997	4.8996	4.4275	3.875	3.9588	4.1041	3.7198	3.2538	3.6048	3.6109	3.7421	4.6472	3.9955	3.5708	4.0069	3.6128	3.8501	4.2305	4.0495	3.379	3.6591	3.5969	3.8732
21	3.9776	3.7111	3.3429	3.647	3.933	3.7379	3.5796	4.1978	3.9284	4.776	4.3175	3.8537	3.9361	4.0944	3.6551	3.243	3.5518	3.6086	3.7413	4.4463	3.9024	3.5586	3.7932	3.6057	3.8301	4.1761	3.9861	3.3506	3.638	3.5522	3.8594
22	3.8866	3.6986	3.1679	3.6091	3.9097	3.7198	3.5683	4.159	3.8911	4.7277	4.3055	3.7796	3.936	4.078	3.62	3.2098	3.5421	3.5988	3.6568	4.4345	3.8556	3.5236	3.6616	3.5758	3.8069	4.1253	3.9828	3.3342	3.6134	3.5407	3.849
23	3.7898	3.6711	3.1453	3.5462	3.8624	3.5563	3.567	4.1284	3.7204	4.6244	4.213	3.7645	3.9254	4.066	3.5952	3.1241	3.5183	3.5515	3.5868	4.3923	3.76	3.4978	3.6346	3.5656	3.8066	4.0778	3.8626	3.3109	3.5865	3.5229	3.8217
24	3.6769	3.6314	2.9786	3.542	3.7072	3.5467	3.5637	4.1046	3.6573	4.587	4.0187	3.7149	3.9063	3.9314	3.5434	3.1211	3.516	3.5089	3.579	4.3333	3.7317	3.4872	3.5772	3.516	3.764	4.0299	3.8548	3.2865	3.5775	3.4894	3.7847
25	3.6764	3.6298	2.9186	3.5071	3.6631	3.519	3.5475	4.0365	3.6284	4.4964	4.0074	3.6863	3.9013	3.8941	3.5423	3.0598	3.4796	3.4116	3.5372	4.304	3.7285	3.4101	3.5746	3.5019	3.745	3.9695	3.8465	3.2164	3.5492	3.4866	3.7658
26	3.6748	3.5719	2.8541	3.4164	3.5167	3.4973	3.5288	3.9842	3.6211	4.1861	3.9714	3.5788	3.8957	3.8665	3.4761	3.0451	3.4629	3.4099	3.5094	4.2172	3.711	3.3197	3.5154	3.4634	3.7427	3.8981	3.8155	3.1948	3.5414	3.4638	3.7582
27	3.6428	3.5313	2.7969	3.3604	3.4977	3.437	3.5287	3.948	3.5876	4.0569	3.8925	3.5734	3.8866	3.8265	3.455	3.0244	3.4495	3.3978	3.4607	4.2008	3.6903	3.3015	3.5019	3.4625	3.6932	3.8505	3.8093	3.1872	3.5292	3.4152	3.7299
28	3.6341	3.523	2.7858	3.3058	3.4806	3.3648	3.5227	3.8068	3.5284	3.9657	3.8754	3.5195	3.8671	3.7538	3.4413	3.0186	3.4289	3.3546	3.4295	4.1753	3.6805	3.229	3.4766	3.4465	3.6547	3.8191	3.7854	3.1852	3.5165	3.3949	3.6989
29	3.5945	3.5135	2.7634	3.2495	3.4699	3.3303	3.5154	3.7298	3.4509	3.9487	3.8216	3.477	3.8308	3.707	3.4064	3.0043	3.3803	3.3453	3.4109	4.1457	3.6704	3.1818	3.4666	3.4207	3.6214	3.759	3.7585	3.0813	3.4968	3.3881	3.6805
30	3.5122	3.4837	2.7289	3.1363	3.4464	3.3166	3.4907	3.6497	3.4445	3.9305	3.7063	3.4223	3.7778	3.6619	3.3372	2.9838	3.3768	3.3431	3.4061	4.1199	3.6489	3.1712	3.4664	3.4164	3.6181	3.7274	3.7061	3.0746	3.4788	3.3775	3.6754
31	3.4777	3.4216	2.6858	3.0545	3.3828	3.2976	3.4269	3.6272	3.4427	3.6798	3.665	3.3706	3.7743	3.6592	3.3045	2.9761	3.3467	3.3288	3.3963	4.1149	3.6406	3.152	3.4654	3.3714	3.6043	3.7245	3.678	2.9943	3.4743	3.3415	3.601
32	3.3586	3.4195	2.6857	2.976	3.3131	3.2924	3.3969	3.5928	3.4422	3.4104	3.6261	3.3268	3.7567	3.6391	3.2938	2.9677	3.2446	3.3135	3.392	4.1021	3.6256	3.1487	3.4315	3.3699	3.5607	3.6688	3.6565	2.9524	3.464	3.3241	3.563
33	3.311	3.1753	2.6207	2.9705	3.2985	3.2771	3.3251	3.5341	3.4334	3.3324	3.6217	3.3239	3.7551	3.5399	3.2291	2.9107	3.2406	3.2811	3.3756	4.0343	3.5623	3.1359	3.34	3.3241	3.4358	3.6379	3.6331	2.9293	3.4573	3.3061	3.5596
34	3.2551	3.1456	2.6111	2.961	3.2911	3.2576	3.2953	3.4462	3.4152	3.2836	3.6135	3.3097	3.737	3.5007	3.2135	2.8764	3.2236	3.2177	3.3749	3.9577	3.5363	3.1004	3.3281	3.303	3.4355	3.6249	3.6291	2.8914	3.3803	3.2567	3.5384
35	3.2519	3.1342	2.5815	2.9588	3.2865	3.2483	3.2755	3.4249	3.3752	3.2531	3.5975	3.2957	3.7185	3.4823	3.1735	2.8608	3.1986	3.1687	3.3451	3.8576	3.534	3.025	3.2166	3.2752	3.4043	3.6124	3.5599	2.8852	3.3537	3.2552	3.4636
36	3.2147	3.134	2.5415	2.9447	3.2842	3.1936	3.2656	3.4119	3.3028	3.2033	3.5836	3.2455	3.6687	3.4787	3.1703	2.8584	3.1893	3.1488	3.3309	3.8507	3.5327	2.9804	3.189	3.2094	3.3855	3.609	3.5373	2.8817	3.3493	3.1819	3.4496
37	3.1827	3.1291	2.3698	2.9285	3.259	3.165	3.2498	3.4104	3.2734	3.1901	3.5592	3.1903	3.6236	3.4742	3.1659	2.8208	3.1873	3.1131	3.3172	3.8169	3.4878	2.9796	3.1676	3.1478	3.3134	3.6054	3.5048	2.8607	3.3466	3.1738	3.4369
38	3.1721	3.0113	2.3583	2.9155	3.2023	3.0909	3.2085	3.3364	3.2659	3.1472	3.3782	3.1347	3.6163	3.4433	3.1145	2.8097	3.186	3.0609	3.2931	3.6994	3.4593	2.9774	3.1461	3.1413	3.2967	3.5877	3.4985	2.8405	3.3337	3.132	3.4069
39	3.1662	2.9356	2.3469	2.8601	3.1785	3.0851	3.208	3.2735	3.2527	3.1184	3.3727	3.1045	3.5996	3.4419	3.0781	2.7904	3.1694	3.0391	3.287	3.4606	3.45	2.9511	3.1451	3.137	3.2732	3.5813	3.4939	2.8364	3.3037	3.1291	3.3917
40	3.1468	2.9302	2.3445	2.8292	3.1751	3.0235	3.1993	3.1749	3.2155	3.1028	3.3716	3.0881	3.5926	3.3957	3.0358	2.7878	3.1443	3.0236	3.2733	3.4384	3.4222	2.9468	3.1151	3.1274	3.2658	3.551	3.4198	2.7602	3.3005	3.1174	3.3819
41	3.1097	2.9237	2.3382	2.8272	3.1683	2.9833	3.1945	3.1588	3.2012	3.059	3.3564	3.0822	3.5813	3.3726	3.0294	2.7768	3.1331	3.0158	3.271	3.4058	3.4089	2.9139	3.1114	3.1217	3.2437	3.5503	3.3992	2.7584	3.2771	3.0813	3.3496
42	3.0567	2.9201	2.3062	2.778	3.1271	2.9709	3.1487	3.1583	3.1904	3.0306	3.3406	3.0674	3.5633	3.3634	3.0081	2.7671	3.0871	2.9936	3.2383	3.3689	3.3982	2.9102	3.0896	3.1204	3.1905	3.5403	3.3192	2.7525	3.2755	3.0594	3.3491
43	3.0412	2.9067	2.283	2.7316	3.1246	2.9095	3.0983	3.1413	3.152	2.9986	3.2739	3.0661	3.5076	3.3307	2.9819	2.7541	3.0785	2.9885	3.2332	3.3501	3.3585	2.8948	3.0436	3.1187	3.1735	3.4626	3.3092	2.722	3.2508	2.9707	3.3324
44	3.0216	2.898	2.2397	2.7004	3.1079	2.9075	3.092	3.084	3.1479	2.9766	3.2437	3.0656	3.5016	3.3163	2.9727	2.7291	3.0606	2.9656	3.1564	3.2896	3.351	2.89	3.0401	3.117	3.1529	3.3998	3.3057	2.6819	3.2305	2.9702	3.3058
45	2.9917	2.8787	2.1945	2.6959	3.0911	2.9048	3.0304	3.0564	2.9292	2.9372	3.2029	3.0642	3.4842	3.3126	2.9714	2.7134	3.0547	2.9503	3.1554	3.285	3.348	2.8836	3.0069	3.1138	3.0907	3.3659	3.2881	2.6772	3.226	2.953	3.2839
46	2.981	2.8768	2.1319	2.6744	3.0899	2.8745	3.0096	3.0423	2.9273	2.9337	3.1831	3.058	3.4327	3.2758	2.9516	2.7019	3.0028	2.9129	3.155	3.2429	3.3308	2.881	2.9732	3.1031	3.0739	3.3633	3.2635	2.6767	3.2081	2.9417	3.2639
47	2.9802	2.8592	2.0392	2.6711	3.0718	2.8567	2.9717	3.026	2.9258	2.8708	3.1577	3.0299	3.4277	3.2635	2.9457	2.6989	2.9392	2.9101	3.1397	3.1503	3.2777	2.873	2.9669	3.0991	3.0482	3.3511	3.2459	2.6565	3.1393	2.9374	3.2383
48	2.979	2.838	1.9415	2.6481	3.0635	2.8483	2.9556	2.9824	2.9082	2.8499	3.1332	3.0184	3.3853	3.2144	2.9424	2.6815	2.9088	2.9065	3.0778	3.0522	3.2396	2.8435	2.9666	3.0957	3.0433	3.3473	3.2337	2.6516	3.1211	2.9293	3.1533
49	2.9335	2.8152	1.9048	2.6249	3.0512	2.8313	2.9522	2.9575	2.9048	2.8321	3.0085	2.9658	3.3732	3.2027	2.887	2.6768	2.9087	2.9008	3.0298	2.9753	3.1881	2.8334	2.9565	3.0608	3.0403	3.3195	3.2057	2.6111	3.0594	2.9057	3.1332
50	2.9164	2.8071	1.845	2.5979	3.0358	2.8174	2.9312	2.94	2.8942	2.8083	2.9633	2.9606	3.3571	3.196	2.8815	2.6733	2.8741	2.892	3.0282	2.8989	3.1606	2.8173	2.9365	3.034	2.9979	3.1948	3.1346	2.5842	3.0588	2.8604	3.126
51	2.8767	2.8061	1.8143	2.5802	3.0269	2.77	2.9109	2.9188	2.8852	2.7749	2.8372	2.9342	3.3537	3.1737	2.8288	2.648	2.8502	2.8721	3.0229	2.8623	3.1595	2.7961	2.8842	3.0295	2.9962	3.1756	3.1151	2.5616	3.0388	2.8542	3.0985
52	2.8698	2.7921	1.8086	2.5561	2.9939	2.7337	2.8969	2.8778	2.8442	2.74	2.8167	2.9267	3.3455	3.1662	2.8198	2.6357	2.7262	2.8524	3.0209	2.8302	3.1451	2.7709	2.8748	3.0071	2.9392	3.1591	3.0864	2.5605	3.0359	2.8498	3.0643
53	2.8571	2.7757	1.757	2.548	2.9681	2.7221	2.8356	2.8562	2.8126	2.7292	2.8125	2.904	3.3136	3.1419	2.8186	2.6345	2.7145	2.8306	3.0003	2.8276	3.0921	2.7565	2.8484	2.9753	2.931	3.1433	3.0703	2.4976	3.0137	2.8485	3.0446
54	2.8567	2.7584	1.7479	2.5358	2.9001	2.7197	2.8034	2.797	2.7881	2.7141	2.6934	2.8438	3.3107	3.0964	2.8055	2.6025	2.7093	2.7942	2.9911	2.8093	3.0614	2.754	2.8461	2.9404	2.9213	3.1262	3.0656	2.494	3.0065	2.8388	3.0404
55	2.8445	2.7413	1.7242	2.5194	2.8809	2.6834	2.7517	2.7935	2.7523	2.5984	2.6674	2.7975	3.3017	3.0759	2.7605	2.558	2.6723	2.7693	2.9689	2.7882	2.9644	2.7435	2.815	2.9354	2.8991	3.0976	3.0491	2.4888	2.9889	2.8088	3.0393
56	2.8287	2.7293	1.7075	2.5066	2.8553	2.6612	2.7351	2.7928	2.7419	2.576	2.6418	2.7938	3.298	3.0483	2.7571	2.5409	2.636	2.7608	2.9412	2.7518	2.9562	2.728	2.7414	2.9233	2.8738	3.06	3.0271	2.4843	2.9743	2.7988	3.0314
57	2.8236	2.6878	1.6987	2.4955	2.8371	2.6602	2.7221	2.7601	2.6692	2.5721	2.6405	2.7933	3.1849	3.0435	2.7125	2.5284	2.6212	2.7566	2.9222	2.6471	2.925	2.6169	2.7157	2.9076	2.8505	3.0548	3.0088	2.4737	2.944	2.7666	3.0243
58	2.7251	2.6789	1.6886	2.464	2.8327	2.6538	2.6923	2.7568	2.6273	2.5548	2.5648	2.7454	3.1337	2.999	2.6792	2.5188	2.5971	2.7481	2.9194	2.6364	2.9102	2.6044	2.701	2.8761	2.8495	3.0493	2.9965	2.4677	2.9275	2.7529	2.9489
59	2.7021	2.669	1.6731	2.4117	2.82	2.642	2.6615	2.6713	2.622	2.5341	2.5054	2.734	3.1263	2.9839	2.6526	2.4971	2.5469	2.672	2.9171	2.6347	2.8689	2.5892	2.6848	2.8555	2.8335	2.998	2.987	2.4446	2.9113	2.7376	2.946
60	2.5665	2.6582	1.6553	2.41	2.8013	2.6018	2.6376	2.5803	2.6132	2.4385	2.4739	2.7206	3.1155	2.9691	2.6526	2.4968	2.5207	2.6575	2.8938	2.6328	2.8158	2.5506	2.6162	2.85	2.8251	2.9924	2.9796	2.4351	2.8696	2.7355	2.9179
61	2.5337	2.6358	1.6518	2.3723	2.6968	2.5588	2.6369	2.5532	2.5945	2.4044	2.3939	2.7061	3.1061	2.9336	2.6442	2.4943	2.5043	2.6534	2.8836	2.6	2.786	2.5381	2.5852	2.8039	2.7925	2.9892	2.9726	2.4286	2.8429	2.6794	2.9106
62	2.5001	2.6225	1.6227	2.3691	2.6924	2.5031	2.6182	2.5296	2.5906	2.3917	2.389	2.6749	3.0409	2.9061	2.6389	2.4393	2.4578	2.6093	2.8821	2.5447	2.7699	2.4746	2.5471	2.771	2.7816	2.9241	2.9627	2.4053	2.8238	2.6768	2.8966
63	2.4683	2.6171	1.6213	2.3317	2.6717	2.4795	2.6161	2.4864	2.5641	2.3558	2.3815	2.6467	3.0087	2.8891	2.63	2.4255	2.4435	2.5788	2.8602	2.4586	2.7139	2.4624	2.5131	2.7634	2.7698	2.8578	2.9231	2.3991	2.82	2.6363	2.875
64	2.4448	2.5949	1.6172	2.3094	2.6221	2.4679	2.6128	2.4824	2.4796	2.3265	2.3715	2.6122	2.9681	2.8517	2.602	2.4036	2.4138	2.5719	2.8561	2.4195	2.7129	2.4254	2.4664	2.7527	2.713	2.85	2.8533	2.397	2.7688	2.629	2.873
65	2.3976	2.5865	1.613	2.2923	2.6122	2.4507	2.5323	2.4721	2.4669	2.3106	2.3347	2.6075	2.9335	2.8149	2.5955	2.3862	2.4115	2.5298	2.8401	2.3974	2.6121	2.4243	2.4375	2.752	2.6971	2.8281	2.8224	2.3924	2.7544	2.6248	2.8674
66	2.3949	2.569	1.5776	2.2912	2.6048	2.4403	2.513	2.4658	2.4401	2.3072	2.3225	2.5816	2.8635	2.8145	2.5929	2.3786	2.3774	2.512	2.8392	2.3674	2.585	2.4226	2.3718	2.7466	2.6919	2.8255	2.8204	2.3889	2.7176	2.5617	2.8641
67	2.3934	2.5582	1.5685	2.2457	2.492	2.4392	2.4451	2.4637	2.4253	2.2558	2.3152	2.573	2.855	2.7943	2.581	2.3672	2.3723	2.4708	2.7776	2.3614	2.553	2.4164	2.3372	2.7294	2.6777	2.7981	2.8084	2.3623	2.6706	2.5615	2.8627
68	2.3928	2.5227	1.5284	2.2393	2.4671	2.4217	2.4343	2.4181	2.4187	2.1688	2.2733	2.5715	2.8227	2.7918	2.5616	2.3575	2.3659	2.4566	2.7681	2.2997	2.5215	2.4005	2.3125	2.7123	2.6643	2.7558	2.8041	2.3588	2.6532	2.5433	2.8613
69	2.3908	2.4894	1.5061	2.1921	2.4531	2.3752	2.424	2.3737	2.4135	2.1222	2.2538	2.5657	2.7959	2.7799	2.5365	2.3551	2.3597	2.431	2.7597	2.2727	2.5197	2.3964	2.298	2.7108	2.6515	2.7006	2.768	2.3501	2.6227	2.5428	2.8432
70	2.3857	2.4093	1.5048	2.1513	2.4502	2.3464	2.4234	2.37	2.3086	2.085	2.152	2.565	2.7655	2.7315	2.5286	2.3453	2.3597	2.4296	2.7517	2.199	2.4295	2.3606	2.28	2.6872	2.6339	2.7003	2.7629	2.3307	2.6205	2.5341	2.8379
71	2.32	2.4025	1.4889	2.1305	2.372	2.3452	2.4171	2.3139	2.2989	2.0322	2.1514	2.565	2.7626	2.6688	2.5178	2.344	2.2991	2.3804	2.7433	2.1542	2.4208	2.3385	2.2497	2.6826	2.6323	2.6834	2.7458	2.2783	2.5934	2.5017	2.8237
72	2.3097	2.3615	1.4642	2.1122	2.3384	2.3421	2.4127	2.3131	2.2873	2.0229	2.0585	2.5543	2.7181	2.6593	2.5039	2.3387	2.2114	2.3784	2.7376	2.0153	2.4202	2.2592	2.2485	2.6655	2.5968	2.6525	2.7374	2.277	2.5711	2.4967	2.8208
73	2.2716	2.3546	1.4591	2.078	2.315	2.3374	2.4048	2.2463	2.2768	1.9606	2.0123	2.532	2.7141	2.6386	2.5021	2.3284	2.2051	2.3705	2.7244	1.9914	2.4041	2.2384	2.2138	2.6312	2.5808	2.6479	2.6931	2.2298	2.551	2.443	2.8135
74	2.2508	2.3527	1.4282	2.0537	2.2952	2.3112	2.3928	2.2253	2.264	1.9514	1.961	2.5288	2.6989	2.5745	2.4946	2.315	2.1974	2.3691	2.7219	1.9801	2.4008	2.2354	2.2102	2.6312	2.5697	2.6064	2.6913	2.2291	2.5427	2.4261	2.8087
75	2.2357	2.3492	1.3857	2.0381	2.279	2.2974	2.3826	2.2216	2.2484	1.9114	1.9277	2.5017	2.6743	2.5683	2.4936	2.3027	2.1862	2.3573	2.7131	1.9398	2.3986	2.2353	2.1883	2.6228	2.5588	2.5964	2.6476	2.2193	2.5324	2.3937	2.7987
76	2.2206	2.3442	1.3498	1.9946	2.2772	2.2713	2.3744	2.2201	2.2385	1.8919	1.9184	2.4697	2.6662	2.5665	2.4387	2.2969	2.1516	2.3567	2.7103	1.9302	2.3975	2.23	2.1876	2.62	2.5417	2.5927	2.6453	2.2123	2.5066	2.3929	2.7686
77	2.1531	2.3349	1.3371	1.9781	2.2121	2.2622	2.3738	2.2095	2.2362	1.8572	1.8306	2.388	2.4649	2.4884	2.4097	2.287	2.1247	2.301	2.702	1.862	2.3635	2.2068	2.1593	2.5913	2.5397	2.5888	2.6449	2.1992	2.5	2.3917	2.75
78	2.1434	2.3294	1.2988	1.9742	2.1928	2.2233	2.3495	2.2081	2.1908	1.7088	1.8059	2.3743	2.438	2.4461	2.4068	2.281	2.101	2.3009	2.6909	1.7754	2.3594	2.1813	2.1531	2.5897	2.536	2.5538	2.5407	2.1985	2.4992	2.3588	2.7203
79	2.127	2.3202	1.2949	1.9628	2.1414	2.2205	2.3141	2.1923	2.1905	1.6896	1.7648	2.3668	2.4184	2.4085	2.3743	2.2675	2.0956	2.2817	2.6842	1.6908	2.3582	2.179	2.1409	2.5836	2.4728	2.5486	2.5172	2.1674	2.4939	2.3543	2.6993
80	2.1118	2.2974	1.2819	1.9285	2.1358	2.2114	2.3037	2.1349	2.1882	1.6027	1.709	2.3648	2.4156	2.328	2.366	2.2488	2.0952	2.2282	2.6694	1.6578	2.3494	2.1733	2.1189	2.5804	2.4696	2.4744	2.4968	2.1673	2.4935	2.3358	2.6992
81	2.0724	2.2928	1.2803	1.9208	2.1149	2.2086	2.2921	2.125	2.1645	1.5643	1.704	2.348	2.4116	2.3071	2.3602	2.2368	2.0467	2.207	2.6431	1.6036	2.2949	2.1533	2.1138	2.5425	2.4467	2.444	2.4875	2.163	2.4838	2.3174	2.6961
82	2.0239	2.2725	1.2781	1.8977	2.1084	2.1931	2.2864	2.106	2.1548	1.4615	1.6776	2.3476	2.3908	2.2812	2.3503	2.2335	2.0426	2.1896	2.6263	1.3761	2.278	2.1444	2.1082	2.5408	2.4297	2.4353	2.4711	2.1564	2.462	2.3032	2.6215
83	2.0138	2.2498	1.2655	1.8963	2.0846	2.1768	2.2744	2.1002	2.1313	1.294	1.6309	2.347	2.3908	2.2687	2.2885	2.227	1.9885	2.1836	2.6176	1.3651	2.2635	2.101	2.0944	2.498	2.4271	2.4117	2.4693	2.1476	2.4518	2.2897	2.6185
84	1.984	2.2429	1.261	1.882	2.0299	2.1225	2.2354	2.0429	2.1241	1.2779	1.6251	2.3203	2.3197	2.2201	2.2807	2.2243	1.9819	2.1797	2.613	1.3636	2.1946	2.0899	2.0153	2.4961	2.4253	2.3588	2.4466	2.1364	2.4423	2.2852	2.5966
85	1.9759	2.2261	1.2514	1.8746	2.0159	2.1091	2.228	2.0357	2.1227	1.2339	1.5969	2.3162	2.2888	2.1194	2.2469	2.2229	1.9426	2.174	2.6012	1.336	2.1429	2.0843	1.9688	2.4753	2.4029	2.3501	2.4418	2.1159	2.435	2.2847	2.5894
86	1.9743	2.2184	1.2246	1.8528	2.004	2.104	2.2128	2.0315	2.1179	1.2132	1.587	2.3023	2.28	2.0505	2.2335	2.2034	1.9226	2.1137	2.5985	1.311	2.1193	2.0826	1.9661	2.4723	2.3907	2.3352	2.4262	2.0857	2.4241	2.2567	2.5857
87	1.9568	2.2062	1.2234	1.7609	1.9833	2.0845	2.2061	2.022	2.1067	1.1609	1.584	2.2859	2.2532	2.0379	2.2153	2.2006	1.9225	2.0982	2.5668	1.2986	2.1098	2.0821	1.9581	2.391	2.358	2.328	2.4206	2.0337	2.4166	2.2417	2.5623
88	1.9451	2.181	1.2179	1.7498	1.9725	2.0769	2.1703	2.0004	2.0747	1.148	1.5794	2.2722	2.2502	2.0357	2.2047	2.1786	1.9007	2.0922	2.5355	1.2448	2.0896	2.0699	1.9563	2.382	2.3427	2.3196	2.4064	2.0291	2.4151	2.2289	2.551
89	1.9153	2.1791	1.2138	1.7163	1.9306	2.0651	2.1628	1.983	2.0704	1.1216	1.5727	2.2489	2.2075	2.0077	2.1719	2.1621	1.8541	2.0313	2.5193	1.2443	2.0831	2.0569	1.9166	2.3715	2.2993	2.2521	2.4013	2.0196	2.411	2.2193	2.5366
90	1.9011	2.1617	1.2049	1.7162	1.9195	2.0562	2.1376	1.9599	2.0212	1.0344	1.5632	2.2109	2.1666	1.9986	2.1701	2.1158	1.8303	1.9972	2.5125	1.1369	2.0649	2.0321	1.8931	2.3432	2.257	2.1586	2.3846	2.0183	2.3954	2.1749	2.5289
91	1.8496	2.1267	1.172	1.7042	1.9024	2.0432	2.1207	1.9575	1.9911	1.0023	1.5612	2.2059	2.1537	1.9922	2.1649	2.0847	1.8032	1.9784	2.5008	1.0988	1.9985	2.0186	1.8927	2.3146	2.2494	2.1234	2.3464	2.0167	2.3888	2.1457	2.5287
92	1.8467	2.1214	1.1715	1.6943	1.8893	2.0312	2.1097	1.9562	1.8724	0.98272	1.5512	2.1974	2.1292	1.9863	2.152	2.0837	1.7971	1.9674	2.4872	1.0605	1.974	2.0095	1.8903	2.31	2.2398	2.071	2.315	2.0044	2.3787	2.1455	2.5059
93	1.845	2.0841	1.1554	1.6768	1.8864	2.0262	2.106	1.9072	1.868	0.98204	1.5333	2.1762	2.1291	1.9595	2.1311	2.0822	1.7516	1.9477	2.4392	1.0471	1.9584	1.9605	1.8804	2.3024	2.2396	2.042	2.2941	1.9896	2.3642	2.1249	2.4812
94	1.8426	2.059	1.1382	1.6722	1.8848	2.0166	2.1014	1.8926	1.8569	0.97759	1.438	2.172	2.1118	1.9431	2.1274	2.0735	1.7423	1.9384	2.435	1.0354	1.9522	1.9409	1.8749	2.2992	2.2222	2.0202	2.2842	1.9861	2.3627	2.0752	2.4547
95	1.8352	2.0232	1.128	1.6355	1.8828	1.9899	2.0994	1.8813	1.8449	0.94788	1.3994	2.162	2.0728	1.9122	2.11	2.0712	1.7029	1.8998	2.4336	0.97115	1.9036	1.8885	1.8456	2.2942	2.1729	2.0191	2.2785	1.9755	2.3477	2.0563	2.4482
96	1.8067	2.0144	1.1226	1.6045	1.8761	1.9806	2.0852	1.8592	1.8291	0.80467	1.3901	2.154	1.9794	1.9006	2.1063	2.0271	1.6955	1.8949	2.4316	0.96732	1.9015	1.8834	1.8389	2.2643	2.1714	1.9555	2.2552	1.968	2.343	2.034	2.437
97	1.7993	1.9397	1.0815	1.5704	1.8732	1.9701	2.063	1.8216	1.8077	0.80226	1.3809	2.1351	1.971	1.866	2.0894	2.0081	1.6874	1.879	2.4311	0.94697	1.789	1.8569	1.8383	2.2069	2.1443	1.9527	2.2321	1.9418	2.3422	2.0299	2.4177
98	1.7786	1.9343	1.0789	1.5687	1.8662	1.9451	2.0531	1.8187	1.7655	0.78159	1.3394	2.1194	1.9558	1.8572	2.0665	1.9983	1.6553	1.8466	2.4213	0.89408	1.7746	1.8549	1.8291	2.2005	2.1321	1.9312	2.213	1.9218	2.3409	2.0287	2.4174
99	1.7586	1.9177	1.0749	1.5509	1.8627	1.908	2.0521	1.8099	1.6508	0.78073	1.3388	2.1081	1.9487	1.8538	2.0595	1.9846	1.6529	1.8403	2.4019	0.85505	1.7386	1.8184	1.756	2.1954	2.1251	1.9078	2.188	1.9209	2.3284	2.0197	2.4046
100	1.7472	1.8849	1.0705	1.5429	1.8423	1.8978	2.0421	1.7708	1.6212	0.76356	1.2507	2.0711	1.937	1.8374	2.0009	1.9796	1.5898	1.8298	2.3758	0.83316	1.6554	1.8088	1.7538	2.1886	2.1222	1.8887	2.1687	1.8936	2.2981	2.0081	2.398
101	1.7191	1.8741	1.064	1.5068	1.8324	1.863	2.0103	1.7649	1.5998	0.75499	1.243	2.0654	1.9309	1.8332	1.997	1.9698	1.5513	1.8241	2.3723	0.83205	1.6022	1.7739	1.7313	2.1381	2.0923	1.8666	2.1575	1.8935	2.2858	1.9978	2.3865
102	1.706	1.8731	1.0585	1.4745	1.8213	1.7928	1.9899	1.7239	1.5988	0.73202	1.2174	2.0406	1.921	1.8191	1.9789	1.9341	1.4424	1.7728	2.3613	0.8249	1.5891	1.7342	1.7112	2.1204	2.0856	1.8118	2.1492	1.8771	2.2849	1.9955	2.3823
103	1.6867	1.8713	1.0496	1.4701	1.8031	1.7621	1.9051	1.7178	1.568	0.72011	1.2098	2.0387	1.8841	1.7815	1.967	1.9311	1.4082	1.7122	2.3471	0.79815	1.5772	1.6999	1.6946	2.1193	2.0803	1.7764	2.1467	1.8417	2.2788	1.9806	2.3623
104	1.6798	1.8579	1.0313	1.4504	1.784	1.7374	1.8847	1.6982	1.5537	0.70606	1.1959	1.9677	1.8595	1.7589	1.9596	1.9264	1.3895	1.6908	2.3307	0.79769	1.5449	1.6963	1.6865	2.1142	2.0705	1.7714	2.1418	1.8299	2.267	1.9746	2.3615
105	1.6768	1.832	1.029	1.4267	1.7198	1.7276	1.8809	1.6905	1.5429	0.70086	1.1889	1.9115	1.8375	1.7394	1.94	1.9186	1.3724	1.6778	2.2934	0.78644	1.5417	1.6894	1.6613	2.1081	2.0568	1.7666	2.1346	1.8098	2.2668	1.9682	2.3496
106	1.6524	1.7958	0.97458	1.3881	1.7165	1.7222	1.8707	1.6697	1.5358	0.70021	1.1524	1.9081	1.8318	1.7164	1.8698	1.9055	1.3681	1.6672	2.2815	0.7445	1.4988	1.6728	1.6475	2.0908	2.0432	1.7255	2.1182	1.7919	2.2617	1.9615	2.3481
107	1.6214	1.7866	0.97111	1.3439	1.6885	1.6949	1.86	1.6546	1.4967	0.69433	1.0945	1.8543	1.8221	1.6988	1.8398	1.9019	1.3393	1.6666	2.2455	0.74032	1.4238	1.652	1.6431	2.0795	2.0392	1.7139	2.0761	1.7885	2.2488	1.9458	2.3219
108	1.6052	1.7671	0.96627	1.3195	1.6774	1.6877	1.8453	1.6404	1.4733	0.69413	1.0737	1.8511	1.7164	1.6206	1.8387	1.8909	1.3256	1.6578	2.228	0.70467	1.3996	1.6304	1.5576	2.063	2.03	1.6903	2.0745	1.7704	2.2144	1.942	2.3096
109	1.5843	1.7268	0.94688	1.2963	1.6614	1.6578	1.8108	1.6381	1.4729	0.64995	1.0479	1.823	1.659	1.6015	1.8296	1.8797	1.2976	1.6305	2.2201	0.67093	1.3808	1.6052	1.5568	2.0347	2.0242	1.689	2.0653	1.7638	2.1412	1.9395	2.3087
110	1.5841	1.7252	0.92236	1.2745	1.6491	1.6134	1.8053	1.6117	1.4725	0.6446	1.0388	1.7725	1.6134	1.5846	1.8243	1.8793	1.2715	1.6128	2.2092	0.67016	1.3645	1.5939	1.5566	2.0165	2.0033	1.6793	2.0645	1.7546	2.1316	1.927	2.3031
111	1.5688	1.7222	0.90418	1.273	1.6316	1.6029	1.7894	1.5229	1.4518	0.64453	0.96174	1.7501	1.5821	1.4594	1.8152	1.8783	1.2492	1.5992	2.1971	0.64221	1.3238	1.5532	1.5377	2.012	1.9662	1.6713	2.038	1.7429	2.1263	1.9257	2.289
112	1.4837	1.6867	0.89459	1.2726	1.6287	1.5706	1.7884	1.515	1.4358	0.63882	0.93988	1.7068	1.5608	1.4444	1.7996	1.855	1.2187	1.5743	2.182	0.64038	1.2628	1.552	1.5344	2.0069	1.9439	1.6123	2.0105	1.7314	2.0628	1.9179	2.2869
113	1.46	1.6826	0.88894	1.2571	1.5864	1.5574	1.7252	1.5143	1.4347	0.63845	0.90389	1.6376	1.5477	1.4068	1.7911	1.8423	1.1868	1.5741	2.1639	0.6383	1.2581	1.5306	1.5327	2.0028	1.9191	1.5604	1.9482	1.7273	2.0627	1.9144	2.2752
114	1.4425	1.66	0.88283	1.2444	1.5728	1.5507	1.7022	1.4452	1.4323	0.63115	0.90162	1.6305	1.5323	1.3597	1.7725	1.8345	1.1711	1.5682	2.1537	0.61303	1.2348	1.5136	1.5306	1.9977	1.8783	1.5412	1.9415	1.7116	2.057	1.8934	2.2559
115	1.4346	1.6557	0.87807	1.2363	1.5433	1.4842	1.6568	1.4354	1.4015	0.60104	0.89358	1.6256	1.4877	1.3061	1.7606	1.8191	1.1683	1.5653	2.1476	0.60473	1.2172	1.5093	1.4187	1.9898	1.871	1.5276	1.9271	1.688	2.0395	1.876	2.2315
116	1.3723	1.6036	0.86337	1.2351	1.5374	1.4076	1.6364	1.3598	1.3641	0.59236	0.88565	1.5677	1.4598	1.2925	1.7327	1.8074	1.1666	1.5534	2.1193	0.59455	1.0911	1.4716	1.396	1.9528	1.857	1.5074	1.9114	1.6837	2.0279	1.8739	2.1997
117	1.345	1.5901	0.86231	1.2274	1.5279	1.3375	1.6224	1.3553	1.3596	0.55954	0.87791	1.5548	1.4215	1.2699	1.7251	1.7988	1.1653	1.5504	2.1144	0.58602	1.0869	1.4665	1.3919	1.9407	1.8421	1.5054	1.8827	1.6524	2.0276	1.8598	2.1917
118	1.293	1.5614	0.85931	1.2259	1.5237	1.3186	1.5831	1.3531	1.3547	0.54446	0.81959	1.5339	1.3894	1.2598	1.7017	1.7977	1.1645	1.5389	2.0744	0.58321	1.0675	1.448	1.3621	1.9326	1.8256	1.4635	1.8642	1.6306	2.0206	1.8523	2.1781
119	1.2853	1.5489	0.85452	1.2136	1.52	1.2837	1.5492	1.3361	1.3483	0.52661	0.81221	1.5044	1.3512	1.1834	1.6948	1.797	1.161	1.5279	2.07	0.57968	1.0485	1.4319	1.3457	1.9222	1.8034	1.4227	1.8354	1.6103	2.0092	1.8418	2.1553
120	1.2759	1.5432	0.85253	1.1797	1.5095	1.274	1.5062	1.3304	1.3461	0.51787	0.80135	1.465	1.2761	1.1591	1.6735	1.7512	1.154	1.5079	2.0344	0.57059	1.006	1.4	1.2926	1.898	1.7811	1.4225	1.8103	1.596	2.0076	1.8345	2.0947
121	1.0483	1.4877	0.8482	1.1635	1.4985	1.2644	1.4598	1.3047	1.2639	0.51199	0.75759	1.4445	1.21	1.1217	1.6701	1.6899	1.1399	1.5047	2.0171	0.53795	0.9886	1.3881	1.2377	1.8801	1.7607	1.3297	1.7942	1.5864	1.9869	1.8114	2.0703
122	1.0445	1.4866	0.84673	1.1461	1.4771	1.2586	1.454	1.2891	1.2136		0.7213	1.3927	1.2025	1.1094	1.6559	1.6877	1.137	1.4998	1.9908	0.52647	0.97707	1.3583	1.1985	1.8421	1.746	1.2331	1.7653	1.5771	1.9865	1.7905	2.0165
123	0.93738	1.4599	0.83572	1.1393	1.4637	1.2343	1.3892	1.2721	1.1885		0.59424	1.3443	1.1151	1.0898	1.643	1.681	1.1129	1.498	1.97	0.52071	0.97021	1.3294	1.1978	1.8157	1.7265	1.1588	1.7274	1.5637	1.9807	1.7869	1.999
124	0.87336	1.409	0.83456	1.1133	1.4407	1.1958	1.3841	1.2554	1.1164		0.57724	1.3169	1.1014	1.085	1.638	1.6737	1.1097	1.4873	1.9517	0.51771	0.91637	1.3046	1.1914	1.7918	1.726	1.1456	1.7183	1.5628	1.9639	1.7812	1.8519
125	0.85011	1.4076	0.8286	1.0976	1.3248	1.1607	1.3619	1.1829	1.1111		0.55548	1.2629	1.0778	1.0409	1.6065	1.6731	1.1081	1.4794	1.9354		0.89831	1.3029	1.1881	1.7729	1.6947	1.1387	1.6918	1.5606	1.9631	1.7781	1.8397
126	0.84136	1.3876	0.79439	1.0974	1.3127	1.1436	1.3489	1.1792	1.0928		0.54746	1.2494	1.0474	1.0381	1.5287	1.6718	1.0988	1.4762	1.9078		0.87847	1.2576	1.1797	1.7619	1.6836	1.1289	1.6663	1.5522	1.9516	1.7446	1.8255
127	0.79133	1.3818	0.79002	1.0911	1.3064	1.0981	1.3341	1.0917	1.0899		0.51067	1.1898	1.0258	0.97207	1.5239	1.6693	1.0342	1.4701	1.9062		0.86549	1.2442	1.1432	1.7614	1.6747	1.0641	1.631	1.5315	1.9324	1.7314	1.8047
128	0.53362	1.3744	0.78106	1.0831	1.2918	1.0912	1.3201	1.0435	1.0833		0.50745	1.183	1.0243	0.94098	1.5174	1.6618	1.0331	1.4383	1.9021		0.85483	1.2441	1.1176	1.739	1.6731	1.0587	1.5753	1.522	1.9198	1.7113	1.7636
129	0.50341	1.3736	0.78056	1.0818	1.2835	1.0891	1.2791	1.0282	1.0724			1.1585	0.95985	0.91949	1.5107	1.651	1.0178	1.4308	1.8684		0.83339	1.2419	1.0934	1.728	1.6725	1.0577	1.5598	1.5218	1.9198	1.6921	1.7583
130		1.3509	0.74628	1.0766	1.2051	1.0656	1.2217	0.99859	1.063			1.1027	0.92723	0.9063	1.5033	1.5971	1.0162	1.4303	1.8287		0.82182	1.2304	1.0592	1.7251	1.6325	1.0237	1.5135	1.5099	1.8871	1.6867	1.7555
131		1.3478	0.74218	1.0634	1.1764	1.006	1.203	0.93894	1.0363			1.0121	0.87132	0.89649	1.4997	1.5967	1.0085	1.4223	1.806		0.74353	1.1805	1.0288	1.7104	1.5854	0.99456	1.4883	1.5055	1.8591	1.6754	1.7426
132		1.3467	0.69222	1.0334	1.1384	0.98993	1.1932	0.92381	0.96797			1.0074	0.86886	0.85923	1.4965	1.594	1.0008	1.417	1.8026		0.73244	1.1612	1.0239	1.6654	1.5775	0.97901	1.4869	1.4618	1.8589	1.6213	1.6882
133		1.2246	0.69211	0.93939	1.1304	0.98203	1.1904	0.92288	0.93637			0.97746	0.86221	0.76912	1.4907	1.5743	0.88019	1.4135	1.7914		0.70618	1.1001	0.96329	1.6574	1.5651	0.91773	1.4306	1.4413	1.8488	1.6083	1.6862
134		1.0848	0.68409	0.87267	1.0639	0.98134	1.1753	0.90222	0.93023			0.96872	0.84571	0.71039	1.4878	1.5694	0.8683	1.3956	1.7874		0.67524	1.0826	0.95675	1.633	1.56	0.89332	1.4082	1.4149	1.8435	1.5965	1.675
135		1.0806	0.68112	0.86905	1.0237	0.96049	1.1714	0.87113	0.92677			0.95395	0.83156	0.56873	1.4588	1.5635	0.85622	1.3722	1.748		0.66631	1.0753	0.95649	1.6317	1.5595	0.89207	1.3072	1.4082	1.8325	1.5962	1.6498
136		1.0207	0.67281	0.86533	1.0025	0.9575	1.1611	0.84858	0.86711			0.93437	0.81826	0.51593	1.4406	1.5621	0.83538	1.3541	1.7285		0.64491	1.0412	0.94506	1.6302	1.5589	0.8908	1.255	1.3997	1.813	1.5893	1.6406
137		0.88012	0.65659	0.85976	0.98437	0.95684	1.1095	0.84808	0.8274			0.91462	0.80715		1.4069	1.5421	0.81422	1.3445	1.7271		0.63742	1.0336	0.87601	1.6209	1.5555	0.87351	1.2503	1.3855	1.7673	1.5819	1.6362
138		0.78851	0.65108	0.85542	0.88868	0.95649	1.0207	0.84327	0.74014			0.90028	0.79889		1.3794	1.5337	0.79526	1.3319	1.7171		0.63699	1.0285	0.86595	1.5779	1.5485	0.85739	1.217	1.3831	1.7386	1.5687	1.6359
139		0.78686	0.64488	0.84952	0.82568	0.85265	0.9744	0.83414	0.73727			0.87909	0.75368		1.2745	1.5308	0.79124	1.3201	1.6788		0.57542	0.9597	0.85509	1.5753	1.5385	0.8185	1.1692	1.3737	1.7226	1.5538	1.6047
140		0.73746	0.63643	0.82156	0.78107	0.77594	0.91241	0.81204	0.62875			0.75255	0.73709		1.2404	1.5305	0.77422	1.3135	1.6497		0.5567	0.94537	0.85171	1.5319	1.5105	0.74817	1.1456	1.3525	1.72	1.5333	1.547
141		0.73147	0.6303	0.8062	0.76148	0.77244	0.89256	0.79325	0.62289			0.7487	0.71783		1.215	1.5261	0.76917	1.3046	1.6357		0.53684	0.9114	0.8467	1.4718	1.5051	0.71576	1.1295	1.3504	1.6874	1.4752	1.5365
142		0.70083	0.62755	0.80222	0.67075	0.76096	0.86942	0.76987	0.57297			0.69996	0.67364		1.1652	1.5236	0.76628	1.301	1.625		0.51975	0.85619	0.83617	1.4284	1.4902	0.7108	1.1241	1.3374	1.6854	1.4747	1.5323
143		0.61733	0.60498	0.78759	0.61613	0.75653	0.85662	0.74952	0.56426			0.66813	0.57406		1.1402	1.5163	0.72925	1.2952	1.5721		0.51816	0.84683	0.82435	1.4199	1.4152	0.66229	1.1207	1.3278	1.6823	1.4703	1.5226
144		0.52539	0.59713	0.75869	0.54794	0.67384	0.80446	0.74532				0.64371	0.56194		1.1288	1.5032	0.69598	1.2859	1.5715		0.51109	0.83797	0.8227	1.4081	1.2911	0.65646	1.0222	1.3263	1.6596	1.436	1.4677
145		0.51139	0.5908	0.74887		0.60795	0.77064	0.73794				0.54923	0.53971		1.1166	1.4935	0.67074	1.2832	1.5392			0.81102	0.79901	1.3929	1.29	0.6003	0.93089	1.3225	1.6399	1.4253	1.4372
146			0.57721	0.6877		0.59963	0.66061	0.69779				0.54577			1.1111	1.4608	0.66721	1.2718	1.5385			0.79657	0.77046	1.3408	1.2794	0.53462	0.89402	1.2931	1.5977	1.4223	1.3363
147			0.57659	0.67716		0.58967	0.64468	0.65225				0.54056			1.0807	1.4468	0.57344	1.2685	1.5007			0.777	0.76663	1.295	1.2722	0.53249	0.81275	1.2898	1.5753	1.403	1.2255
148			0.56595	0.64665		0.51811	0.61704	0.64033				0.53565			1.0743	1.4359	0.55827	1.2644	1.4993			0.66545	0.74869	1.2904	1.2634	0.50762	0.76062	1.2879	1.5377	1.3757	1.0826
149			0.56586	0.64288		0.50311	0.58563	0.52661				0.52693			1.073	1.4151	0.54772	1.2491	1.4806			0.64728	0.68812	1.2785	1.2533		0.62433	1.2821	1.5262	1.372	0.9855
150			0.54136	0.58142			0.55405	0.52317				0.52644			1.0669	1.4134	0.52464	1.2439	1.4427			0.64318	0.68108	1.2078	1.2494		0.57649	1.273	1.5248	1.3634	0.96678
151			0.53821	0.57927			0.5378	0.51519							1.0566	1.3966	0.51028	1.2374	1.4293			0.63108	0.67055	1.1953	1.2278		0.54176	1.2601	1.5223	1.3632	0.91365
152			0.52827	0.56701			0.52066								1.052	1.3942	0.50627	1.2316	1.3919			0.59222	0.6579	1.1458	1.1731			1.2455	1.5052	1.3465	0.88885
153			0.50253	0.56477			0.5075								1.0476	1.3712		1.2198	1.3896			0.58083	0.64972	1.1418	1.1463			1.234	1.4894	1.3454	0.81141
154				0.56408											1.0406	1.3658		1.2182	1.3726			0.53554	0.62196	1.1358	1.1083			1.2311	1.4786	1.3271	0.76004
155				0.56347											1.0405	1.3617		1.1803	1.3226			0.50708	0.60054	1.1026	1.0724			1.2052	1.4702	1.3217	0.72313
156				0.55471											0.96593	1.3575		1.1542	1.29				0.57852	1.071	1.07			1.2005	1.4638	1.311	0.65711
157				0.54376											0.93116	1.3555		1.1273	1.2794				0.57571	1.0042	1.0683			1.1998	1.4323	1.3104	0.59666
158				0.54238											0.85446	1.3391		1.1004	1.259				0.56389	0.95195	0.89509			1.1898	1.41	1.3018	0.53614
159				0.53309											0.84584	1.3386		1.0946	1.2366				0.55266	0.95153	0.88851			1.1732	1.393	1.2868	0.52851
160				0.52756											0.81373	1.3008		1.0772	1.207				0.53159	0.94966	0.82341			1.1464	1.3846	1.2805
161				0.52656											0.8023	1.2804		1.0745	1.2053				0.53055	0.94774	0.82198			1.1224	1.3743	1.2654
162				0.52362											0.76736	1.2661		1.0463	1.1084				0.51604	0.91783	0.76113			1.0946	1.3726	1.2437
163				0.52004											0.66761	1.2597		1.0383	1.0958					0.86372	0.76096			1.0879	1.3667	1.2393
164															0.51171	1.2578		1.0337	1.0873					0.84153	0.75137			1.0811	1.3052	1.2278
165																1.253		1.0058	1.0539					0.82927	0.74994			1.0631	1.3037	1.2272
166																1.2437		0.98737	1.042					0.71311	0.65745			1.0536	1.2778	1.1904
167																1.225		0.98633	0.98454					0.67242	0.6359			1.0409	1.1074	1.1756
168																1.2119		0.97101	0.96618					0.62397	0.60095			1.0062	1.0832	1.1672
169																1.21		0.9521	0.96479					0.60176	0.58702			0.98958	1.0805	1.1588
170																1.1737		0.92935	0.86658					0.5801	0.57074			0.96295	1.0296	1.1518
171																1.1603		0.9176	0.7931					0.56814	0.56252			0.95906	0.97197	1.151
172																1.1573		0.90767	0.76623					0.54068	0.55876			0.93584	0.96554	1.081
173																1.1557		0.90135	0.74144					0.53153	0.55113			0.93216	0.94425	1.081
174																1.1548		0.87813	0.68343					0.50821	0.50802			0.90841	0.93829	1.0783
175																1.1531		0.85624	0.64176									0.85388	0.89227	1.0774
176																1.123		0.81456										0.84488	0.86178	1.0767
177																1.1146		0.69767										0.81624	0.82209	1.0703
178																1.0613		0.67626										0.80377	0.8029	1.0384
179																1.0556		0.6281										0.80352	0.80255	1.0138
180																1.0512		0.60237										0.78509	0.68072	1.0117
181																1.0428		0.58062										0.77644	0.58236	0.99718
182																1.0168		0.53465										0.77621	0.52545	0.96594
183																0.98071												0.75638		0.94406
184																0.96802												0.75108		0.9402
185																0.95722												0.73252		0.93806
186																0.9486												0.72844		0.9284
187																0.94205												0.7168		0.87791
188																0.93904												0.70953		0.86742
189																0.93773												0.70123		0.84596
190																0.88181												0.68669		0.82346
191																0.85635												0.67535		0.80145
192																0.85495												0.66852		0.77633
193																0.81941												0.65217		0.74411
194																0.78284												0.64847		0.71126
195																0.77042												0.6466		0.67545
196																0.7326												0.63155		0.64948
197																0.72888												0.62765		0.63695
198																0.72204												0.61575		0.60572
199																0.71289												0.61068		0.56072
200																0.70287												0.61024
201																0.70248												0.59378
202																0.69316												0.59026
203																0.64643												0.58608
204																0.62726												0.58547
205																0.53835												0.54679
206																0.51522												0.53609
207																0.50629												0.52786
208																												0.50715
209																												0.50468
