# Supplementary material for: Direct translation of climbing fiber burst-mediated sensory coding into post-synaptic Purkinje cell dendritic calcium
Source: eLife. 2020 Sep 28;9:e61593. doi: 10.7554/eLife.61593 (PMC7581426; doi:10.7554/eLife.61593)
Supplement: Figure 3—figure supplement 2—source data 1. [file elife-61593-fig3-figsupp2-data1.xlsx]

## Sheet: Sheet1
Panel d
PC calcium amplitudes
Event number	Spon	P1	P2
1	3.42738	3.72287	2.4136
2	1.36353	3.40111	2.53022
3	2.58289	1.52026	2.33947
4	1.07014	3.17207	2.33068
5	1.9507	2.08492	2.48097
6	2.4155	2.23363	2.24534
7	1.71517	1.33172	1.74357
8	1.70859	3.53241	2.77033
9	3.22534	2.56547	2.26403
10	1.03465	1.2837	1.80198
11	1.54444	3.5826	2.66144
12	2.15877	2.12015	2.62517
13	1.17011	2.02881	1.1674
14	2.57016	1.95558	1.44693
15	1.51278	2.1064	1.87563
16	3.07451	1.3081	1.89287
17	2.25314	1.94327	2.40556
18	1.23122	1.15678	3.94589
19	1.25854	2.65376	1.21696
20	1.16589	2.6435	1.55365
21	0.53451	2.46111	1.57384
22	1.09264	1.75745	2.63088
23	1.41719	2.28192	2.82614
24	1.0295	1.32781	2.37083
25	1.02044	1.0028	4.277
26	3.50445	2.6243	4.91966
27	0.769782	2.98761	4.04172
28	2.32085	1.22779	5.49456
29	1.2357	1.09547	2.69163
30	0.173049	1.78748	3.08964
31	0.917935	1.3489	1.91348
32	1.36414	1.61756	5.06628
33	1.46334	1.98511	1.5862
34	2.4465	4.67549	1.88872
35	1.00042	0.568312	4.75134
36	1.29996	2.82504	2.60238
37	2.07905	3.19194	4.25792
38	2.46502	1.74699	5.53589
39	2.0997	2.49382	1.63772
40	2.05607	0.917836	2.07916
41	2.07249	1.99521	4.27953
42	3.49117	0.958058	2.25302
43	1.65877	1.51182	2.91328
44	2.3765	2.8705	2.89176
45	2.67611	2.44342	3.09612
46	2.18263	1.92779	2.80853
47	1.49078	1.80618	3.42904
48	0.347736	2.7816	3.76244
49	1.48837	0.885837	2.3887
50	2.05277	2.79922	0.927146
51	3.63033	2.79442	3.3183
52	0.959509	3.60769	1.52672
53	2.27311	0.506637	-0.16313
54	1.64572	2.90019	4.15442
55	2.01875	3.00034	4.10244
56	1.5496	4.3145	4.02966
57	1.56113	3.08161	4.25775
58	0.760292	3.16247	2.00646
59	2.26456	2.14627	1.76999
60	0.78484	2.17328	1.12817
61	1.18413	1.50593	3.07361
62	1.09693	3.86148	2.57851
63	1.0234	2.95658	1.54088
64	1.91054	2.92284	3.38752
65	2.21922	2.26113	1.66311
66	0.704359	2.07765	4.09685
67	1.88654	1.70747	0.970588
68	1.34407	4.27945	3.67022
69	2.80833	4.09715	0.8547
70	0.372982	2.46255	1.02038
71	1.25526	2.26203	2.75841
72	1.20783	2.31226	0.891272
73	0.603519	2.11086	1.55807
74	0.306772	0.893028	2.48353
75	1.70346	2.25883	1.84583
76	1.89447	3.92326	5.24077
77	0.484442	3.0081	2.35976
78	2.00681	2.57851	1.54348
79	1.35302	2.95725	3.84464
80	1.125	0.70465	1.91866
81	1.22931	2.49863	1.40763
82	2.22993	1.22904	2.13057
83	2.19955	1.68903	2.82381
84	2.73088	2.37267	4.39318
85	1.37424	0.920609	6.39502
86	1.136	1.9465	1.84262
87	1.09616	2.92777	3.2398
88	2.15606	2.15907	4.02186
89	1.92829	2.95255	2.95813
90	3.72859	1.7309	3.28779
91	1.79779	3.29014	2.00458
92	2.21954	0.747164	1.16442
93	2.17049	2.62409	4.7402
94	1.71672	1.51328	1.30633
95	1.01993	1.86428	5.45252
96	2.09287	2.38555	2.24868
97	1.11229	0.901419	3.48599
98	1.33172	2.58063	1.35939
99	1.17023	0.778657	2.95925
100	0.450658	1.24278	1.79497
101	0.691152		2.48306
102	1.33976		2.8255
103	0.518698		3.89085
104	1.02794		1.96962
105	0.572967		1.0147
106	0.587443		3.32312
107	2.09197		1.63569
108	0.0860092		6.33505
109	0.527752		2.39704
110	0.239129		2.70984
111	1.66295		3.97439
112	0.773471		2.01819
113	1.43477		2.13871
114	2.5856		0.880517
115	1.5885		2.80566
116	4.60826		3.13746
117	2.27963		2.48867
118	2.93038		5.3921
119	2.38357		4.14615
120	1.02774		2.67661
121	1.00147		3.99611
122	1.16649		1.21485
123	2.31051		2.1182
124	2.44343		4.92886
125	2.49231		2.87187
126	0.996545		2.26645
127	1.65198		2.31916
128	2.87674		0.868881
129	1.34852		3.58575
130	1.55393		1.86673
131	1.30803		1.10303
132	2.22898		2.50679
133	0.604078		3.04673
134	1.78622		3.35987
135	2.33681		1.69251
136	1.73044		1.28988
137	1.26521		2.82664
138	0.94471		1.5381
139	2.14379		3.99304
140	1.70602		2.91578
141	1.2315		2.85124
142	1.42235		1.41735
143	1.35798		2.04088
144	1.21805		2.63109
145	1.78948		3.21197
146	1.99925		3.05203
147	1.57513		1.49081
148	1.64786		2.68155
149	1.67932		4.9132
150	1.21673		1.67794
151	1.36637		3.94645
152	1.22764		4.09901
153	1.70393		3.04935
154	2.3468		2.82363
155	1.32981
156	0.615422
157	2.00948
158	1.50454
159	0.606254
160	1.63556
161	2.71861
162	0.941042
163	2.6458
164	0.824071
165	0.909641
166	0.69248
167	1.64833
168	1.70421
169	1.02994
170	0.365514
171	1.07463
172	1.02283
173	0.839898
174	0.980312
175	1.67046
176	2.6263
177	0.41265
178	0.883113
179	0.895489
180	0.668178
181	0.334404
182	2.93098
183	0.658776
184	2.70634
185	2.80648
186	0.562634
187	0.72343
188	1.18029
189	2.06076
190	2.62803
191	1.46424
192	1.64057
193	1.87014
194	1.7553
195	0.998671
196	1.7295
197	0.076499
198	1.97749
199	1.90572
200	1.72587
201	1.90044
202	1.96617
203	1.23465
204	1.14708
205	1.65433
206	1.27993
207	1.28551
208	2.10161
209	0.391324
210	1.72332
211	0.808035
212	2.81574
213	1.04695
214	1.33733
215	1.09603
216	2.41023
217	1.64344
218	0.892741
219	0.773254
220	0.935454
221	1.17346
222	2.70391
223	0.885509
224	1.77693
225	1.751
226	1.26268
227	3.16426
228	1.05088
229	3.57916
230	2.41111
231	2.07968
232	1.16621
233	1.70982
234	1.68943
235	1.84201
236	3.33669
237	2.5062
238	1.85241
239	2.26861
240	3.89879
241	1.71786
242	3.18398
243	2.75499
244	0.776076
245	1.67051
246	2.18578
247	2.32024
248	1.87294
249	1.9251
250	1.2201
251	3.11081
252	1.15171
253	0.618837
254	0.956594
255	1.13679
256	0.767985
257	1.10927
258	1.38094
259	1.61074
260	0.989673
261	1.00649
262	1.31618
263	0.298465
264	0.982894
265	0.911718
266	1.34485
267	0.6395
268	1.37347
269	0.00819872
270	1.36763
271	1.54327
272	1.63839
273	1.034
274	0.718928
275	0.606666
276	1.07925
277	-0.113125
278	1.38411
279	2.60858
280	3.13438
281	2.17672
282	1.65742
283	1.34169
284	2.06136
285	0.959751
286	1.1788
287	2.62971
288	0.947517
289	2.0335
290	3.50174
291	1.76493
292	2.6918
293	1.13459
294	1.80146
295	5.68341
296	1.28061
297	1.05584
298	2.08049
299	1.59156
300	2.10719
301	1.49665
302	1.26031
303	1.0252
304	3.19023
305	1.80919
306	0.920347
307	1.72771
308	0.636254
309	1.23567
310	0.879857
311	1.35091
312	2.32744
313	0.579002
314	0.794201
315	0.391987
316	1.08427
317	0.965961
318	1.9597
319	0.854117
320	2.45754
321	1.92995
322	0.945926
323	0.807357
324	1.25037
325	2.72787
326	1.53686
327	0.325565
328	1.96536
329	1.6439
330	2.76362
331	1.93571
332	0.73488
333	1.89364
334	0.963942
335	0.97231
336	0.615062
337	0.927466
338	2.77463
339	2.04106
340	0.0577472
341	1.88319
342	0.351748
343	0.818718
344	0.577787
345	0.997723
346	1.34895
347	0.194511
348	0.792315
349	1.19891
350	0.368703
351	0.545616
352	4.01157
353	2.03618
354	2.43533
355	4.81508
356	1.7268
357	1.59303
358	1.81467
359	2.11322
360	1.59436
