# Supplementary material for: Direct translation of climbing fiber burst-mediated sensory coding into post-synaptic Purkinje cell dendritic calcium
Source: eLife. 2020 Sep 28;9:e61593. doi: 10.7554/eLife.61593 (PMC7581426; doi:10.7554/eLife.61593)
Supplement: Figure 3—source data 1. [file elife-61593-fig3-data1.xlsx]

## Sheet: Sheet1
Panel e					Panel f				Panel g
CF calcium amplitude in response to air puff					Correlation during rest				Correlation during air puff
Event number	Spontaneous	P1	P2		Pair number	Peak motion speed	CF calcium amplitude		Pair number	Peak motion speed	CF calcium amplitude
1	2.76938	3.1518	2.3334		1	80.5391	3.69042		1	4.9209	2.92772
2	3.71347	2.6474	3.769		2	114.502	3.07053		2	3.19238	3.27487
3	3.24502	1.9675	3.1834		3	100.142	2.35258		3	2.87207	4.27012
4	6.07079	2.0283	3.5242		4	88.5098	3.1367		4	5.72852	2.10396
5	0.913356	2.5446	5.016		5	99.8408	3.95544		5	0.418945	2.59152
6	2.88893	3.3038	5.917		6	74.8594	5.22271		6	0.301758	3.01837
7	1.90158	3.0698	4.8198		7	115.02	2.8599		7	2.22949	4.70783
8	2.64113	4.0996	1.8951		8	90.6309	2.73784		8	2.21582	3.14838
9	3.9462	4.4063	3.7626		9	54.2197	5.01077		9	8.87305	4.59869
10	0.993221	4.1441	3.5633		10	76.1143	1.64215		10	20.0176	1.76785
11	1.75764	3.7693	3.3195		11	53.2646	0.253001		11	0.295898	3.11243
12	3.82075	3.9944	4.0385		12	72.001	3.36054		12	5.25391	1.51088
13	2.79862	2.9213	3.6394		13	96.5889	2.37743		13	2.42578	1.77388
14	2.11851	3.6563	5.5646		14	86.9307	4.31598		14	0.994141	3.88254
15	2.00347	3.6051	3.8653		15	55.8242	2.0888		15	6.44629	0.564272
16	2.53073	4.237	3.3258		16	66.1875	1.85347		16	2.12402	3.07182
17	2.23765	3.3469	3.3652		17	76.4883	4.16699		17	8.5752	2.20388
18	2.45449	3.4594	2.7863		18	83.0156	2.2094		18	3.41602	2.00063
19	2.85383	3.8874	3.2838		19	45.5986	4.33757		19	1.32031	2.01081
20	3.7844	4.1051	6.1504		20	38.1191	3.3506		20	1.00977	2.38798
21	2.30867	2.9556	3.38		21	41.4121	3.26952		21	4.73535	1.84223
22	1.30774	5.3875	3.3154		22	89.0811	4.15629		22	8.45508	2.14791
23	0.838823	2.0549	1.943		23	7.58594	3.49771		23	1.27344	3.05519
24	3.17196	2.3655	3.7107		24	36.1436	2.85807		24	4.57129	3.68037
25	0.814981	0.91719	4.1384		25	20.6816	1.36334		25	0.790039	2.92223
26	4.47542	2.5743	3.0446		26	18.7607	0.143062		26	3.00488	3.60654
27	1.08025	2.8557	3.7993		27	31.002	1.08754		27	27.415	2.37726
28	3.78675	3.2485	4.2936		28	17.542	-0.0691638		28	2.97754	2.41085
29	3.16918	3.6433	6.0337		29	5.88965	2.90237		29	2.85254	1.68058
30	1.97107	2.4501	3.4294		30	31.1006	2.89112		30	3.24316	3.15415
31	5.28894	3.0554	2.9359		31	15.0879	6.03698		31	13.4219	3.67809
32	5.89075	3.6034	1.8202		32	11.8623	3.45644		32	5.40039	2.33017
33	0.989736	2.6905	1.8344		33	9.44336	6.52538		33	12.8359	1.6714
34	3.94491	3.1265	0.81178		34	37.0771	5.26667		34	4.75684	2.31914
35	1.21235	3.3091	3.113		35	26.4463	2.64588		35	2.78809	2.06043
36	1.32664	3.1464	3.6111		36	49.3984	4.50237		36	7.45996	1.55739
37	3.03082	3.7587	1.4795		37	77.5215	3.59538		37	0.172852	2.88158
38	1.20022	2.7486	2.2187		38	34.8848	2.36499		38	29.5322	0.766348
39	3.36547	4.4468	1.7486		39	27.5156	4.52388		39	0.34668	2.31708
40	2.22819	2.9578	0.57672		40	43.7441	5.53092		40	2.85059	2.1466
41	1.2826	2.5671	2.3334		41	80.5391	4.79901		41	2.85059	0.651948
42	0.633803	2.9931	3.769		42	114.502	1.70343		42	1.64941	2.1423
43	4.09436	2.8085	3.1834		43	100.142	3.79111		43	32.8633	3.60357
44	4.2044	3.0572	3.5242		44	88.5098	3.92969		44	0.322266	2.73785
45	3.1691	2.9244	5.016		45	99.8408	5.37405		45	2.04688	2.8692
46	3.61221	2.9539	5.917		46	74.8594	2.07148		46	7.96484	4.00306
47	2.21896	4.0209	4.8198		47	115.02	3.40921		47	3.17871	1.92253
48	2.297	2.6861	1.8951		48	90.6309	1.78211		48	0.732422	1.38855
49	3.18648	2.8456	3.7626		49	54.2197	3.15988		49	21.7246	2.2991
50	1.72735	3.1773	3.5633		50	76.1143	2.77341		50	0.875977	0.760377
51	1.37993	2.289	3.3195		51	53.2646	2.89426		51	3.18262	2.56908
52	3.68961	2.6545	4.0385		52	72.001	4.85717		52	3.06543	3.94251
53	2.84281	4.1658	3.6394		53	96.5889	2.21224		53	3.31152	2.82787
54	2.30809	2.428	5.5646		54	86.9307	5.63788		54	28.8486	2.83051
55	0.714259	3.0722	3.8653		55	55.8242	4.88733		55	3.04688	3.07941
56	1.89852	1.4594	2.2217		56	66.1875	0.204848		56	0.446289	3.02378
57	2.28152	1.9677	3.3258		57	76.4883	2.89141		57	3.04492	1.48064
58	1.96852	1.6975	3.3652		58	83.0156	2.70937		58	0.506836	3.76612
59	5.20204	1.6915	2.7863		59	45.5986	3.6418		59	0.125	1.97438
60	4.2693	1.4101	3.2838		60	38.1191	2.18421		60	2.24902	3.17431
61	1.24673	2.6978	6.1504		61	41.4121	3.52555		61	1.60156	2.65402
62	4.56086	2.6655	3.38		62	89.0811	0.249534		62	3.51367	3.33841
63	3.16176	1.8086	3.3154		63	7.58594	0.31215		63	9.63086	1.38779
64	0.9288	2.6529	1.943		64	36.1436	0.358482		64	3.11523	1.76838
65	1.16105	2.9193	3.7107		65	20.6816	-0.183089		65	3.04688	2.94781
66	1.45662	0.46314	4.1384		66	18.7607	1.35146		66	2.72949	1.46371
67	2.36107	0.55384	3.0446		67	31.002	0.244505		67	3.19922	1.27306
68	2.77602	3.99	3.7993		68	17.542	3.95426		68	27.415	4.23033
69	2.13652	1.7971	4.2936		69	5.88965	-0.0728506		69	6.54883	1.53668
70	3.35502	2.9629	6.0337		70	31.1006	0.309895		70	6.06934	1.3169
71	0.788788	1.7342	3.4294		71	15.0879	3.83641		71	5.1084	2.24173
72	2.2944	2.193	2.9359		72	11.8623	2.28612		72	7.58301	3.22963
73	2.35931	1.5162	1.2438		73	9.44336	5.58346		73	5.0459	3.1066
74	2.06167	1.5055	1.8202		74	37.0771	0.549883		74	11.4365	3.50214
75	3.89125	2.8695	1.8344		75	26.4463	1.87		75	12.8359	1.25606
76	3.85754	2.5516	0.81178		76	49.3984	1.00529		76	23.873	1.97852
77	0.609267	1.076	3.113		77	77.5215	2.93504		77	5.32031	1.27647
78	3.64166	1.6613	3.6111		78	34.8848	-0.15567		78	3.46484	2.62999
79	1.08194	2.0037	1.4795		79	27.5156	0.0779371		79	0.480469	3.04333
80	2.04536	1.1087	2.2187		80	43.7441	3.56381		80	2.85059	3.6255
81	1.35524	1.78	0.72707		81	80.5391	4.6643		81	0.176758	3.18968
82	1.34381	3.2549	3.0849		82	114.502	1.68219		82	2.95606	3.99246
83	1.65083	1.6776	3.9311		83	100.142	2.17552		83	1.69824	1.97815
84	3.38442	3.1439	2.8644		84	88.5098	0.700907		84	5.96289	3.68794
85	2.6986	2.8574	2.8922		85	99.8408	5.65561		85	15.4785	1.77658
86	3.3887	2.9978	1.5773		86	74.8594	2.59041		86	3.62695	2.11725
87	2.99159	1.8774	3.2462		87	115.02	1.21332		87	3.20215	2.00103
88	1.32338	2.0792	2.4946		88	90.6309	4.38002		88	4.13379	1.61803
89	1.64228	0.92746	2.9815		89	54.2197	4.91802		89	7.96484	2.81809
90	3.13696	3.0882	2.9917		90	76.1143	4.27943		90	6.12695	2.40391
91	3.5741	3.5837	3.9562		91	53.2646	0.80316		91	5.09668	4.11386
92	3.36542	2.5494	3.2496		92	72.001	3.43053		92	6.59668	1.43039
93	2.08223	0.47694	1.7828		93	96.5889	2.36279		93	6.16699	1.72315
94	1.43886	2.5696	1.2291		94	86.9307	4.93835		94	0.301758	1.06559
95	1.78971	0.22212	0.75399		95	55.8242	3.80077		95	1.99316	3.72579
96	2.31575	1.8827	2.1824		96	66.1875	3.77812		96	9.14648	2.23314
97	0.723667	2.0979	2.0462		97	76.4883	3.33788		97	4.09473	1.09648
98	0.883113	1.5105	1.4323		98	83.0156	4.16377		98	14.8145	1.42188
99	1.07958	2.0751	3.9246		99	45.5986	2.57825		99	3.27246	3.51645
100	0.975004	3.141	3.1202		100	38.1191	1.59032		100	2.79688	3.76746
101	3.9369	1.468	0.80453		101	41.4121	-0.193269		101	2.42578	1.01141
102	1.16156	1.1936	4.1418		102	89.0811	3.10463		102	4.25977	4.35934
103	2.13424	1.9084	1.8739		103	7.58594	-0.0206611		103	0.953125	1.10877
104	1.37812	3.1042	1.6192		104	36.1436	1.31542		104	6.44629	0.994272
105	0.741233	2.1376	1.7598		105	20.6816	1.47741		105	4.44141	1.76628
106	1.44382	3.0734	2.4282		106	18.7607	-0.270008		106	8.65918	1.18305
107	1.29092	2.7098	2.7319		107	31.002	2.46409		107	3.04688	3.30043
108	4.28998	3.1475	2.1585		108	17.542	-0.13246		108	3.4707	3.20918
109	4.55672	3.9377	2.4337		109	5.88965	4.08491		109	0.938477	1.37445
110	3.73603	1.5165	4.9846		110	31.1006	3.25673		110	3.04492	1.51297
111	3.75293	2.9922	5.0197		111	15.0879	-0.174065		111	22.7236	4.83406
112	0.89468	6.3419	5.0359		112	11.8623	4.70329		112	9.06055	2.32351
113	0.657733	3.861	4.5489		113	9.44336	-0.284248		113	2.57031	1.73608
114	2.28575	2.5218	3.3667		114	37.0771	5.8767		114	0.125	3.86016
115	1.11281	3.5393	4.7625		115	26.4463	3.01086		115	2.92481	1.27686
116	1.02275	4.141	3.5508		116	49.3984	5.24826		116	2.24902	3.39482
117	1.93079	4.208	4.1637		117	77.5215	3.11427		117	3.51367	1.38482
118	2.59142	4.2795	5.4655		118	34.8848	3.96832		118	1.27832	1.916
119	4.02355	4.3095	4.3648		119	27.5156	4.17149		119	3.11523	3.0813
120	3.32587	1.4658	2.8084		120	43.7441	3.17107		120	1.00781	2.99272
121	3.73275	2.4793	5.0228		121	80.5391	3.31386		121	3.00488	2.01945
122	4.45575	3.1337	4.0827		122	114.502	3.36901		122	9.42188	0.842218
123	2.72977	3.6772	4.6658		123	100.142	-0.623826		123	9.99805	3.49972
124	2.87935	4.036	2.0771		124	88.5098	4.64617		124	2.99512	1.45913
125	1.07316	4.4294	2.2888		125	99.8408	-0.44983		125	11.1523	3.8211
126	2.31657	3.7154	2.5271		126	74.8594	5.13567		126	2.90527	2.53138
127	2.31518	3.4884	2.3237		127	115.02	3.02407		127	0.320312	1.71457
128	1.82453	4.3134	2.3547		128	90.6309	3.61087		128	4.76758	1.59217
129	0.695519	2.9891	2.371		129	54.2197	0.783135		129	12.3633	2.86103
130	2.10544	2.432	0.51134		130	76.1143	0.114846		130	5.32031	2.13862
131	0.541456	2.684	2.2463		131	53.2646	0.373124		131	0.265625	2.85697
132	4.76664	3.4206	3.2114		132	72.001	2.72391		132	3.22168	2.92798
133	0.623168	3.3452	0.98088		133	96.5889	-0.425258		133	12.1826	4.10233
134	1.2441	2.6769	2.9967		134	86.9307	2.53523		134	2.69238	2.12195
135	2.01057	1.5963	1.9177		135	55.8242	0.475767		135	29.5322	0.561804
136	0.544801	2.4228	0.089399		136	66.1875	2.49907		136	7.69336	3.40208
137	2.84753	2.2617	0.91764		137	76.4883	1.64184		137	3.00586	2.06265
138	1.4937	2.9456	2.5344		138	83.0156	2.96456		138	3.43262	1.02867
139	1.62904	3.9924	1.8561		139	45.5986	4.18611		139	1.84961	2.30186
140	3.43725	3.1701	1.5208		140	38.1191	2.38448		140	6.65527	4.87122
141	6.09117	6.3353	1.3877		141	41.4121	3.95128		141	2.95606	1.25796
142	2.11515	3.5153	1.529		142	89.0811	3.9862		142	1.05176	2.08413
143	0.684737	2.911	3.8945		143	7.58594	3.03619		143	2.97363	2.50673
144	5.92062	1.9107	2.4648		144	36.1436	2.81018		144	5.96289	2.47244
145	4.14506	0.58924	2.8366		145	20.6816	4.1064		145	2.26465	2.42789
146	2.66463	3.4491	1.3584		146	18.7607	2.86577		146	5.63769	3.13906
147	3.1255	3.2108	1.2049		147	31.002	3.61107		147	0.477539	2.61938
148	0.65121	1.9107	0.5402		148	17.542	2.43777		148	3.31152	1.46843
149	0.515343	6.4742	4.3204		149	5.88965	4.48445		149	21.7246	2.57002
150	1.69576	2.5596	3.7549		150	31.1006	-0.0747391		150	0.301758	3.29637
151	2.35896	2.3735	3.4268		151	15.0879	4.54248		151	1.48047	1.60666
152	2.15585	2.7016	3.6824		152	11.8623	4.08795		152	6.20215	4.26331
153	0.625668	3.3666	4.0266		153	9.44336	4.15162		153	2.06543	1.21642
154	1.22021	2.4924	3.2145		154	37.0771	1.9401		154	13.3047	2.79877
155	1.73073	1.6317	5.8528		155	26.4463	0.0896856		155	3.48144	3.29016
156	3.31075	3.1857	3.7381		156	49.3984	0.0472626		156	4.25977	2.49003
157	3.09261	2.8452	3.4094		157	77.5215	4.10758		157	6.44629	3.16861
158	0.594894	3.0989	2.0715		158	34.8848	3.51585		158	6.17188	1.2531
159	2.74852	1.8756	0.61419		159	27.5156	0.786781		159	1.89941	0.907105
160	1.85436	1.9639	2.8214		160	43.7441	2.52215		160	0.365234	2.38312
161	1.51139	2.7098	1.2259		161	80.5391	3.62544		161	2.45215	3.25254
162	1.29418	3.1475	1.6667		162	114.502	0.141918		162	1.60156	2.23728
163	2.37663	3.9377	2.7788		163	100.142	2.01038		163	3.51367	0.747151
164	2.69572	1.5165	0.90608		164	88.5098	5.77667		164	0.222656	0.975339
165	3.50515	2.9922	2.3622		165	99.8408	4.59495		165	2.72949	3.17727
166	3.599	6.3419	3.1617		166	74.8594	3.37479		166	0.523437	1.97873
167	2.86091	3.861	2.913		167	115.02	2.48947		167	3.00488	2.47202
168	0.835502	2.5218	4.753		168	90.6309	3.13539		168	3.24219	1.4761
169	3.061	3.5393	4.1739		169	54.2197	2.85082		169	3.24805	2.50214
170	2.48281	4.141	7.3484		170	76.1143	2.7711		170	7.90625	2.00979
171	2.22302	4.208	3.4435		171	53.2646	4.75137		171	1.82324	1.41804
172	3.19332	4.2795	2.6493		172	72.001	4.21331		172	4.67871	1.96511
173	1.50809	4.3095	3.2189		173	96.5889	2.07399		173	13.8398	2.5057
174	1.6258	1.4658	3.6877		174	86.9307	2.71361		174	5.07812	2.09336
175	1.03736	2.4793	3.6541		175	55.8242	0.40457		175	5.9834	2.6558
176	0.56972	3.1337	3.8939		176	66.1875	1.13036		176	2.91894	2.35963
177	1.40932	3.6772	2.6006		177	76.4883	4.06553		177	11.4365	1.26716
178	1.39682	4.036	1.5698		178	83.0156	4.72662		178	14.3457	1.68615
179	3.09261	4.4294	3.2219		179	45.5986	3.40056		179	3.43262	1.63444
180	0.594894	3.7154	2.8927		180	38.1191	3.75157		180	0.480469	3.32523
181	2.74852	3.4884	3.9291		181	41.4121	1.4028		181	2.5957	1.92542
182	1.85436	4.3134	2.3717		182	89.0811	-0.329401		182	2.95898	0.711511
183	2.13732	2.9891	4.5248		183	7.58594	3.39992		183	7.69336	1.38089
184	1.29418	2.432	3.3806		184	36.1436	2.81106		184	0.176758	0.535412
185	2.37663	2.684	1.7499		185	20.6816	2.65265		185	9.95605	1.17027
186	2.69572	3.4206	3.9438		186	18.7607	4.72828		186	2.95606	2.79777
187	3.50515	3.3452	3.8918		187	31.002	5.31813		187	1.57422	2.19554
188	3.599	2.6769	3.0912		188	17.542	4.92694		188	3.33789	2.99186
189	2.86091	1.5963	3.7744		189	5.88965	3.76537		189	0.171875	1.00094
190	0.835502	2.4228	3.6907		190	31.1006	4.0098		190	3.41406	1.29397
191	2.70551	2.2617	4.5611		191	15.0879	4.25753		191	2.4082	0.894462
192	2.48281	2.9456	3.4724		192	11.8623	-0.344502		192	12.5811	3.16093
193	2.22302	3.9924	3.2909		193	9.44336	4.49115		193	2.04688	2.39012
194	3.19332	3.1701	3.6918		194	37.0771	5.02322		194	6.25977	1.75804
195	1.50809	6.3353	3.9246		195	26.4463	1.91694		195	7.96484	1.65699
196	1.6258	3.5153	3.9927		196	49.3984	4.06741		196	0.732422	1.53081
197	1.03736	2.911	1.8972		197	77.5215	2.70844		197	8.69629	2.28439
198	0.56972	1.9107	4.0013		198	34.8848	4.12362		198	5.72852	1.31673
199	1.40932	0.58924	4.0471		199	27.5156	3.41756		199	2.49316	0.669918
200	2.00959	3.4491	3.5449		200	43.7441	4.22495		200	6.60938	3.20189
201	2.48304	3.2108	5.2601		201	80.5391	4.54652		201	5.09668	3.48135
202	3.73221	1.9107	2.5498		202	114.502	3.14969		202	8.95605	1.46341
203	2.84658	6.4742	3.1091		203	100.142	4.65556		203	0.09082	3.36297
204	1.21311	2.5596	1.8706		204	88.5098	2.37199		204	6.14062	1.5617
205	3.27867	2.3735	3.5265		205	99.8408	0.61161		205	3.18262	0.997798
206	3.95146	2.7016	3.1303		206	74.8594	3.38325		206	0.301758	2.09803
207	3.04709	3.3666	3.7464		207	115.02	0.749709		207	2.20312	0.530882
208	2.28247	2.4924	5.4916		208	90.6309	2.45692		208	6.20215	3.98883
209	2.61045	1.6317	3.2081		209	54.2197	3.75584		209	5.76953	2.21254
210	3.23715	3.1857	4.0054		210	76.1143	4.61124		210	3.26465	0.873205
211	3.72845	2.8452	2.9901		211	53.2646	4.07336		211	8.52246	2.69405
212	4.71115	3.0989	-0.027374		212	72.001	3.31129		212	3.27246	1.18014
213	1.68696	1.8756	4.0669		213	96.5889	3.19406		213	2.79688	3.29077
214	1.67774	1.9639	1.1688		214	86.9307	7.19157		214	2.42578	1.49197
215	3.62848	2.5962	2.8662		215	55.8242	3.3249		215	4.25977	3.21848
216	3.33842	1.5745	0.89226		216	66.1875	4.78902		216	14.8145	0.501174
217	2.00959	1.5397	3.0048		217	76.4883	3.9799		217	6.17188	2.04898
218	2.48304	3.6876	3.1545		218	83.0156	4.95363		218	2.70606	3.6298
219	3.67725	4.8521	3.5932		219	45.5986	3.55342		219	3.04688	3.01927
220	2.83836	1.831	2.0417		220	38.1191	3.56187		220	3.01758	0.649553
221	1.2049	2.3496	2.9829		221	41.4121	3.1983		221	8.83789	1.46554
222	3.25034	2.0174	4.4765		222	89.0811	4.21822		222	2.45215	1.62796
223	3.94325	2.7176	3.0597		223	7.58594	-0.324687		223	22.7236	0.855659
224	2.94303	5.9089	2.5845		224	36.1436	-0.213991		224	3.10254	0.604372
225	2.5618	1.4141	4.2636		225	20.6816	2.26174		225	6.39258	1.39271
226	3.1404	2.6058	6.1918		226	18.7607	-0.12641		226	0.506836	1.14914
227	3.16861	2.2458	2.4003		227	31.002	5.5209		227	2.24902	3.4302
228	3.72023	2.6756	4.5997		228	17.542	6.07379		228	1.60156	2.89527
229	4.70293	2.173	3.0789		229	5.88965	4.76268		229	0.222656	0.844227
230	1.53865	3.0231	3.2397		230	31.1006	3.59702		230	3.55664	1.80906
231	1.62496	2.8549	2.794		231	15.0879	2.98578		231	2.92773	1.32986
232	3.58172	1.0966	7.9862		232	11.8623	1.6915		232	3.24219	0.919362
233	3.25188	1.7757	5.5621		233	9.44336	3.27351		233	3.14062	1.67778
234	2.30416	2.5363	0.66239		234	37.0771	2.29114		234	3.24805	1.61092
235	1.58859	1.5946	2.9248		235	26.4463	2.54399		235	1.82324	3.53443
236	3.19052	2.067	4.6048		236	49.3984	2.35264		236	2.91211	3.16958
237	3.73871	2.512	2.1449		237	77.5215	3.72305		237	13.8398	2.33391
238	1.69453	3.1144	3.3498		238	34.8848	2.81864		238	5.07812	4.10209
239	2.59521	3.89	1.2454		239	27.5156	2.85108		239	1.78516	1.10897
240	1.50796	3.5388	2.0956		240	43.7441	3.66796		240	0.492187	0.912943
241	0.717251	1.4279	3.5868		241	80.5391	2.7549		241	12.3633	0.874869
242	6.33508	3.1033	0.20729		242	114.502	3.69953		242	0.331055	0.591253
243	0.655778	2.67	1.984		243	100.142	0.695175		243	0.275391	2.44355
244	2.95902	2.5387	3.1146		244	88.5098	5.12736		244	3.43262	3.58118
245	0.568871	3.5466	2.9015		245	99.8408	4.0978		245	2.69238	2.12704
246	0.551729	3.1903	3.7158		246	74.8594	4.83419		246	6.70215	2.86962
247	1.54495	3.1083	2.4212		247	115.02	1.55265		247	7.69336	0.987314
248	2.52523	2.952	2.8888		248	90.6309	3.95366		248	3.43262	0.911568
249	2.93623	1.526	4.6678		249	54.2197	4.0815		249	6.22266	1.70047
250	0.873166	3.6833	4.4458		250	76.1143	4.37034		250	6.08789	1.00811
251	1.5401	1.4088	1.7343		251	53.2646	0.13155		251	2.4082	2.15686
252	3.89094	4.2529	3.7659		252	72.001	3.99556		252	10.333	1.78983
253	2.30416	2.0931	3.5401		253	96.5889	1.4781		253	5.90234	3.99014
254	1.58859	3.5012	1.8437		254	86.9307	3.62527		254	5.96289	1.71444
255	3.19052	2.4475	2.1844		255	55.8242	2.60818		255	1.47168	3.04233
256	3.73317	1.9399	4.2737		256	66.1875	1.83903		256	3.41699	2.67675
257	1.65399	3.4794	4.8866		257	76.4883	2.7692		257	8.59863	1.86157
258	2.58692	2.9585	4.195		258	83.0156	2.10254		258	3.36816	1.80272
259	1.49967	3.5386	3.5692		259	45.5986	2.50953		259	2.40039	3.06173
260	0.605841	4.2824	4.0329		260	38.1191	2.78195		260	1.48047	3.27444
261	6.32955	3.7582	3.0201		261	41.4121	3.78269		261	3.30664	2.00784
262	0.590803	2.9136	4.5549		262	89.0811	3.86319		262	3.06543	4.14652
263	3.32889	1.7294	4.6139		263	7.58594	3.39927		263	1.73535	1.11308
264	0.55784	1.0166	3.2161		264	36.1436	4.27979		264	10.8682	3.58445
265	1.51619	2.5859	3.9818		265	20.6816	4.62682		265	5.74707	3.50263
266	1.47221	2.6381	3.9596		266	18.7607	1.71896		266	17.7725	4.06932
267	2.50356	1.8855	5.5648		267	31.002	4.18546		267	4.24219	3.63313
268	2.9307	1.8552	5.9011		268	17.542	3.14312		268	3.04688	3.0805
269	0.825733	2.8652	3.5074		269	5.88965	0.523383		269	2.12402	4.01656
270	1.47394	3.4705	4.797		270	31.1006	4.90981		270	8.5752	2.29935
271	3.88265	2.8692	4.4322		271	15.0879	4.62287		271	3.04492	2.76116
272	3.60694	1.616	4.4862		272	11.8623	-0.0572443		272	6.39356	1.0809
273	1.28689	2.0731	3.9688		273	9.44336	4.28779		273	6.32422	2.04893
274	4.53443	2.1769	4.1113		274	37.0771	4.77847		274	14.9854	2.73968
275	2.17912	2.9907	3.4565		275	26.4463	3.09965		275	0.931641	2.59917
276	2.95216	2.5952	3.27		276	49.3984	4.55366		276	0.125	1.10468
277	1.14182	3.7551	0.58781		277	77.5215	4.56878		277	3.51367	1.7323
278	1.55408	5.2441	5.8115		278	34.8848	1.47742		278	4.57129	1.10235
279	1.12258	3.7388	0.58612		279	27.5156	2.87863		279	3.40918	1.13135
280	1.69354	2.4885	5.7533		280	43.7441	4.2948		280	3.01269	1.08132
281	1.08213	3.9512	5.2379		281	80.5391	3.61552		281	3.24219	4.49299
282	1.38894	2.4302	3.8883		282	114.502	4.0367		282	3.26367	1.54734
283	1.04042	3.457	4.4013		283	100.142	2.84659		283	6.65527	2.39334
284	1.1754		4.1251		284	88.5098	3.29552		284	2.85254	1.75339
285	1.03564		3.4136		285	99.8408	4.73937		285	5.1084	0.551925
286	2.40663		3.4596		286	74.8594	3.4125		286	2.91211	1.86396
287	2.91476		1.8305		287	115.02	2.23145		287	13.8398	3.09035
288	1.41401		4.2169		288	90.6309	1.94971		288	0.608398	1.30428
289	2.22709		4.9316		289	54.2197	3.18511		289	5.07812	2.13138
290	1.67655		1.3456		290	76.1143	1.36292		290	9.79199	2.50891
291	0.918186		2.2558		291	53.2646	2.72258		291	15.5654	1.70831
292	0.855121		3.5107		292	72.001	1.66402		292	3.46484	0.589867
293	0.51543		1.8453		293	96.5889	4.58767		293	3.43262	1.617
294	1.6463		4.3081		294	86.9307	1.47531		294	3.41894	0.851247
295	1.25659		3.3689		295	55.8242	4.22141		295	17.4824	1.80442
296	3.50947		2.8154		296	66.1875	3.15192		296	4.82812	0.978461
297	1.28689		3.8189		297	76.4883	3.8602		297	32.8633	4.39499
298	4.53443		4.1318		298	83.0156	2.90038		298	0.166016	1.78007
299	2.17912		3.4053		299	45.5986	3.42537		299	1.43945	2.951
300	2.95216		2.1432		300	38.1191	3.03563		300	2.28418	2.08639
301	1.14182		3.2403		301	41.4121	4.88319		301	9.15723	1.05971
302	1.55408		3.5643		302	89.0811	0.380416		302	2.30469	1.57367
303	1.12258		2.5888		303	7.58594	0.0415772		303	3.45606	2.01971
304	1.69354		2.818		304	36.1436	3.05302		304	2.80176	2.34352
305	1.08213		4.7391		305	20.6816	4.56986		305	2.54785	1.59617
306	1.38894		3.3788		306	18.7607	5.55708		306	4.25488	1.13991
307	2.90103		4.7105		307	31.002	3.34542		307	0.477539	0.960621
308	1.1754		5.5525		308	17.542	4.90595		308	15.2471	0.519987
309	3.90428		1.9468		309	5.88965	3.04445		309	2.06543	3.00937
310	2.40663		2.7241		310	31.1006	1.12574		310	0.625	1.06891
311	2.91476		3.3899		311	15.0879	4.45724		311	0.301758	1.24833
312	2.25195		4.4495		312	11.8623	0.172914		312	3.29981	5.44901
313	1.41401		4.4979		313	9.44336	3.86701		313	2.75391	0.675673
314	2.22709		3.0299		314	37.0771	5.97297		314	0.933594	3.76327
315	1.67655		2.7463		315	26.4463	5.10765		315	1.38574	0.921611
316	0.918186		4.614		316	49.3984	2.85107		316	2.79688	2.01814
317	0.855121		5.2425		317	77.5215	3.62441		317	1.35644	1.88103
318	0.51543		5.4615		318	34.8848	5.08504		318	0.967773	0.502104
319	1.6463		3.5416		319	27.5156	1.20482		319	2.80273	1.94096
320	1.34362		3.7901		320	43.7441	5.33477		320	6.10352	3.14043
321	0.763558		2.7098		321	80.5391	2.90704		321	5.50293	1.44732
322	2.19094		1.7417		322	114.502	3.2337		322	2.12402	0.532598
323	1.90578		4.7866		323	100.142	3.48255		323	6.13769	4.1666
324	1.95134		1.5583		324	88.5098	0.518337		324	1.26367	0.583857
325	1.61027		5.4502		325	99.8408	3.74371		325	3.41602	1.97621
326	3.13448		0.71677		326	74.8594	2.5647		326	0.532227	1.31526
327	1.33483		4.1962		327	115.02	2.67282		327	0.931641	1.12627
328	2.06486		2.215		328	90.6309	3.66452		328	6.07715	1.24093
329	1.08311		1.6471		329	54.2197	5.35698		329	4.54492	1.77751
330	1.44194		-0.10669		330	76.1143	6.97778		330	8.45508	1.04426
331	1.52563		3.0748		331	53.2646	4.47884		331	3.60644	2.05043
332	4.91721		2.0873		332	72.001	3.57386		332	5.17871	2.32703
333	2.08415		1.7961		333	96.5889	2.47119		333	4.57129	6.29651
334	0.984721		2.7343		334	86.9307	3.89715		334	2.89062	0.626708
335	0.999195		3.5358		335	55.8242	3.6895		335	3.69141	0.659454
336	1.33123		2.3969		336	66.1875	2.63831		336	10.2578	0.813445
337	0.798983		2.6468		337	76.4883	4.01734		337	1.14258	0.521582
338	2.20336		1.5152		338	83.0156	5.47213		338	0.203125	0.711132
339	1.98716		2.4264		339	45.5986	4.73875		339	0.479492	1.05286
340	1.96378		1.9852		340	38.1191	3.31508		340	3.00488	2.66303
341	1.63466		4.5199		341	41.4121	4.15614		341	7.01269	4.01925
342	3.1469		4.1445		342	89.0811	2.5927		342	4.74805	1.68821
343	1.34725		3.2828		343	7.58594	4.84712		343	1.51953	2.32722
344	3.10559		4.1598		344	36.1436	5.5712		344	6.6582	2.16059
345	1.18937		2.0349		345	20.6816	4.34546		345	6.50781	2.19927
346	2.69172		2.0387		346	18.7607	4.53034		346	2.91211	1.80201
347	1.53805				347	31.002	3.28398		347	5.0459	3.26709
348	2.14854				348	17.542	3.35537		348	12.0264	1.70826
349	4.92344				349	5.88965	0.125228		349	0.039062	0.811601
350	2.09657				350	31.1006	5.1696		350	19.6455	0.679288
351	0.984721				351	15.0879	2.43007		351	11.4365	2.99689
352	3.07801				352	11.8623	3.19444		352	15.5654	2.33677
353	1.9784				353	9.44336	2.90482		353	0.212891	1.40926
354	1.70182				354	37.0771	3.60865		354	2.78809	1.44238
355	5.78313				355	26.4463	0.0937525		355	3.60547	4.91549
356	4.36139				356	49.3984	3.82328		356	1.33887	3.41876
357	4.33447				357	77.5215	2.49226		357	3.00586	2.34445
358	2.53434				358	34.8848	1.85234		358	4.82812	1.3789
359	0.974381				359	27.5156	5.01048		359	6.28711	1.09906
360	5.91161				360	43.7441	4.10075		360	0.176758	1.74571
361	0.955086				361	80.5391	2.27187		361	0.453125	2.40935
362	2.4518				362	114.502	2.7331		362	3.59277	3.07865
363	2.28232				363	100.142	1.84596		363	2.4082	1.50982
364	2.72034				364	88.5098	0.505205		364	2.96387	0.87721
365	2.48934				365	99.8408	0.891048		365	3.45606	2.78223
366	2.36				366	74.8594	2.251		366	1.5332	2.5156
367	0.74919				367	115.02	3.15414		367	3.26758	0.569222
368	1.63951				368	90.6309	3.50814		368	2.07617	0.558647
369	3.76631				369	54.2197	0.456246		369	0.913086	1.29737
370	0.927895				370	76.1143	0.864559		370	30.7168	0.912677
371	3.09833				371	53.2646	-0.108572		371	5.60156	0.646176
372	3.07801				372	72.001	2.25291		372	6.28125	2.22232
373	1.9784				373	96.5889	1.99607		373	11.4619	1.02654
374	1.70182				374	86.9307	4.65713		374	6.43555	0.846619
375	5.75917				375	55.8242	2.52605		375	0.301758	3.01183
376	4.07478				376	66.1875	2.88514		376	5.92578	1.21756
377	4.29855				377	76.4883	3.95251		377	3.29981	2.05609
378	2.20339				378	83.0156	3.30585		378	0.477539	1.47698
379	0.666087				379	45.5986	3.81182		379	2.03906	1.31509
380	1.38328				380	38.1191	5.3433		380	10.8682	2.37905
381	0.674344				381	41.4121	2.39677		381	0.933594	2.08958
382	2.47773				382	89.0811	-0.379404		382	5.25391	1.32095
383	1.86383				383	7.58594	2.10983		383	8.87207	2.59929
384	2.69637				384	36.1436	4.15493		384	3.3584	2.90188
385	0.523826				385	20.6816	-0.0680156		385	4.19141	1.87305
386	2.09358				386	18.7607	3.17028		386	0.967773	1.82578
387	2.21383				387	31.002	4.25343		387	5.01758	1.27304
388	0.724595				388	17.542	0.0235559		388	6.44629	3.47915
389	1.35652				389	5.88965	-0.134694		389	6.46973	3.23929
390	3.24582				390	31.1006	4.67657		390	2.12402	2.573
391	0.63521				391	15.0879	1.87487		391	8.5752	2.56616
392	0.521285				392	11.8623	-0.473507		392	0.97168	0.822715
393	0.552174				393	9.44336	3.94707		393	6.38477	0.955146
394	2.39257				394	37.0771	5.66469		394	3.04492	2.36105
395	2.99359				395	26.4463	1.89488		395	2.45215	2.52743
396	0.656722				396	49.3984	2.009		396	0.532227	2.78789
397	5.5837				397	77.5215	3.61693		397	2.24902	2.66884
398	5.25769				398	34.8848	4.30675		398	9.63086	5.77614
399	0.77616				399	27.5156	0.394687		399	22.8467	3.31897
400	5.58996				400	43.7441	2.86199		400	5.2832	0.944677
401	2.53166				401	80.5391	2.51238		401	14.0039	3.48639
402	0.617721				402	114.502	2.55097		402	0.790039	3.39669
403	3.00026				403	100.142	2.7446		403	21.4805	3.07152
404	1.6293				404	88.5098	4.62349		404	4.01172	3.91444
405	2.60474				405	99.8408	4.60572		405	16.3975	0.535586
406	2.81949				406	74.8594	3.48906		406	1.77734	1.45519
407	1.84767				407	115.02	3.94715		407	6.6582	4.1343
408	2.98535				408	90.6309	-0.234116		408	5.36426	1.7525
409	2.63243				409	54.2197	2.67081		409	5.93652	1.56087
410	2.02268				410	76.1143	2.86494		410	2.91211	1.02235
411	0.595263				411	53.2646	2.02186		411	2.89062	1.65479
412	2.01048				412	72.001	2.81851		412	8.03027	1.82142
413	2.357				413	96.5889	4.18268		413	13.8398	0.69843
414	0.552174				414	86.9307	0.0602361		414	13.4219	1.3187
415	2.39257				415	55.8242	1.22371		415	3.18066	1.25352
416	2.99359				416	66.1875	2.7572		416	9.79199	1.02254
417	0.656717				417	76.4883	3.4173		417	4.75684	1.76357
418	5.50134				418	83.0156	2.59132		418	4.69434	0.710369
419	5.05678				419	45.5986	2.18401		419	3.22168	1.92365
420	0.628338				420	38.1191	4.21672		420	7.45996	0.613095
421	5.57646				421	41.4121	5.76316		421	3.60547	4.1083
422	2.36119				422	89.0811	4.72511		422	3.04297	0.747398
423	2.26083				423	7.58594	3.59404		423	3.00684	2.95154
424	1.36501				424	36.1436	5.29974		424	3.48926	1.33324
425	2.82612				425	20.6816	3.53353		425	1.33887	5.10694
426	2.67721				426	18.7607	2.1431		426	1.33887	0.909962
427	1.71187				427	31.002	3.31141		427	4.82812	1.91124
428	0.776372				428	17.542	4.22972		428	0.176758	5.26115
429	2.56725				429	5.88965	4.62195		429	9.48047	0.913762
430	1.8388				430	31.1006	4.756		430	2.34766	2.04116
431	0.696412				431	15.0879	-0.225131		431	3.36133	0.581929
432	1.91418				432	11.8623	3.42404		432	5.08301	2.50133
433	3.6683				433	9.44336	-0.0637086		433	2.30469	1.78489
434	5.77322				434	37.0771	4.7613		434	3.26758	2.46869
435	2.84838				435	26.4463	2.70697		435	1.36133	2.98416
436	3.32734				436	49.3984	4.6934		436	4.54004	0.933557
437	3.75051				437	77.5215	3.68534		437	3.32129	5.07175
438	1.6788				438	34.8848	2.76434		438	7.96484	1.26529
439	2.51135				439	27.5156	4.33301		439	0.732422	2.42865
440	0.589427				440	43.7441	5.30293		440	9.08008	1.95659
441	1.30171				441	80.5391	1.30281		441	6.20215	5.22686
442	0.606001				442	114.502	2.27942		442	28.8486	1.84754
443	1.81434				443	100.142	1.90522		443	8.13965	3.18269
444	3.02748				444	88.5098	4.07304		444	1.68262	1.00855
445	3.12646				445	99.8408	4.52115		445	4.54883	0.830305
446	1.93424				446	74.8594	3.42784		446	3.04688	2.26997
447	2.01388				447	115.02	0.567287		447	0.477539	0.770655
448	3.94608				448	90.6309	3.39064		448	3.625	1.25821
					449	54.2197	2.08796		449	0.446289	1.87137
					450	76.1143	3.40289		450	6.29102	3.08674
					451	53.2646	2.39204		451	0.791992	1.92801
					452	72.001	4.54735		452	2.79883	1.62926
					453	96.5889	1.88242		453	5.00781	1.59029
					454	86.9307	2.18041		454	8.33887	1.35942
					455	55.8242	2.65645		455	1.60156	2.90399
					456	66.1875	3.98516		456	6.94043	1.73482
					457	76.4883	4.17482		457	4.88574	1.96227
					458	83.0156	2.6279		458	9.63086	1.52866
					459	45.5986	2.16218		459	3.55664	2.8432
					460	38.1191	2.65907		460	0.790039	1.74542
					461	41.4121	5.72724		461	0.523437	2.29636
					462	89.0811	3.90209		462	3.00488	2.75366
					463	7.58594	3.71595		463	27.415	1.40238
					464	36.1436	4.24839		464	12.0264	0.727774
					465	20.6816	0.480931		465	6.54883	2.26548
					466	18.7607	5.1247		466	16.6299	1.24787
					467	31.002	4.61352		467	3.24805	3.06485
					468	17.542	2.63491		468	3.95996	0.587674
					469	5.88965	2.65221		469	4.13672	3.94039
					470	31.1006	4.18261		470	7.86523	1.35142
					471	15.0879	4.15594		471	6.50781	1.18488
					472	11.8623	2.84467		472	15.7148	0.665477
					473	9.44336	3.59202		473	0.608398	2.03708
					474	37.0771	5.48123		474	5.07812	3.3099
					475	26.4463	2.08808		475	11.4365	2.51938
					476	49.3984	0.28045		476	12.3633	3.89518
					477	77.5215	4.17533		477	2.08106	2.84751
					478	34.8848	3.53084		478	0.480469	2.11662
					479	27.5156	2.51318		479	6.70215	2.12948
					480	43.7441	5.53505		480	3.00195	0.578756
					481	80.5391	2.38262		481	1.53125	2.19717
					482	114.502	3.16392		482	5.90234	1.86297
					483	100.142	-0.296423		483	5.54394	0.660706
					484	88.5098	2.25574		484	30.1016	1.26863
					485	99.8408	-0.219396		485	2.29102	2.16716
					486	74.8594	2.66182		486	0.322266	5.21918
					487	115.02	3.17959		487	5.96289	2.93746
					488	90.6309	2.39376		488	1.33398	2.74912
					489	54.2197	2.08577		489	5.3418	2.49023
					490	76.1143	-0.112593		490	3.62695	2.0564
					491	53.2646	0.0393276		491	1.37207	1.42881
					492	72.001	3.94378		492	3.17871	1.00264
					493	96.5889	2.22504		493	12.0205	2.24287
					494	86.9307	2.44406		494	2.06543	1.78787
					495	55.8242	-0.291338		495	11.4619	2.25695
					496	66.1875	0.956		496	6.14844	2.43271
					497	76.4883	1.43301		497	2.91894	3.76108
					498	83.0156	4.02919		498	3.18262	2.6558
					499	45.5986	2.61712		499	3.47363	0.538326
					500	38.1191	2.14239		500	9.49023	3.30233
					501	41.4121	4.63231		501	3.29981	2.07812
					502	89.0811	3.05149		502	5.51562	1.23458
					503	7.58594	3.06491		503	0.477539	0.644116
					504	36.1436	2.53879		504	9.10645	1.88657
					505	20.6816	2.48203		505	17.2168	0.511934
					506	18.7607	3.04468		506	3.3584	0.751663
					507	31.002	3.93573		507	8.13965	1.68636
					508	17.542	4.4044		508	5.17773	1.14957
					509	5.88965	3.20884		509	1.35059	2.57151
					510	31.1006	4.88587		510	2.79688	3.63278
					511	15.0879	4.68452		511	13.584	1.30186
					512	11.8623	3.99627		512	2.84375	0.968935
					513	9.44336	5.13549		513	6.28223	1.56664
					514	37.0771	2.84608		514	9.02148	2.26934
					515	26.4463	2.41045		515	7.34863	3.08253
					516	49.3984	4.01159		516	3.02441	1.66636
					517	77.5215	2.0711		517	3.41602	2.0992
					518	34.8848	0.201381		518	4.56738	1.7655
					519	27.5156	3.75887		519	8.6709	1.26226
					520	43.7441	3.19396		520	1.36133	4.15921
					521	80.5391	1.77378		521	3.60644	1.48222
					522	114.502	2.03708		522	3.44824	0.575175
					523	100.142	2.76525		523	3.51367	2.13964
					524	88.5098	3.14578		524	8.21387	1.96706
					525	99.8408	4.25103		525	9.63086	1.05579
					526	74.8594	3.38342		526	2.89062	1.41597
					527	115.02	2.43893		527	3.29688	4.7142
					528	90.6309	0.066421		528	2.89453	3.10084
					529	54.2197	2.64057		529	2.62402	2.30922
					530	76.1143	3.22835		530	3.00488	2.66089
					531	53.2646	3.42908		531	6.06934	1.99243
					532	72.001	4.91997		532	2.21387	3.39086
					533	96.5889	4.09466		533	3.72559	2.34128
					534	86.9307	0.671281		534	3.51465	1.73037
					535	55.8242	2.41865		535	6.6582	2.30826
					536	66.1875	1.61357		536	3.17481	1.15945
					537	76.4883	2.57251		537	11.1523	3.78859
					538	83.0156	1.1548		538	5.80273	1.49905
					539	45.5986	2.50605		539	11.4365	3.14447
					540	38.1191	1.21589		540	26.3496	0.624283
					541	41.4121	0.598491		541	3.04297	3.28118
					542	89.0811	2.61919		542	0.275391	1.09679
					543	7.58594	1.29167		543	3.00195	1.90831
					544	36.1436	0.178171		544	7.69336	2.31291
					545	20.6816	2.49573		545	3.94141	1.37752
					546	18.7607	3.38249		546	7.01172	1.79285
					547	31.002	3.36505		547	4.82812	0.703431
					548	17.542	-0.31266		548	6.38477	0.546865
					549	5.88965	3.21732		549	5.96191	1.30164
					550	31.1006	3.30406		550	7.5	3.36328
					551	15.0879	3.30721		551	0.349609	0.682408
					552	11.8623	0.30533		552	0.322266	2.15797
					553	9.44336	2.11719		553	3.26465	2.9598
					554	37.0771	0.681404		554	5.94434	0.935034
					555	26.4463	1.28139		555	5.96289	0.933738
					556	49.3984	0.354125		556	3.41699	2.75955
					557	77.5215	2.45544		557	3.32129	4.28239
					558	34.8848	4.0777		558	6.12695	2.79355
					559	27.5156	2.73725		559	0.732422	1.32419
					560	43.7441	3.3026		560	12.9766	2.63517
					561	80.5391	4.23691		561	0.875977	3.48712
					562	114.502	1.86845		562	3.30664	4.58336
					563	100.142	3.14994		563	1.48047	1.03799
					564	88.5098	2.3158		564	2.93555	2.55057
					565	99.8408	4.29247		565	3.06543	2.33821
					566	74.8594	1.94113		566	4.25977	2.90681
					567	115.02	-0.129858		567	4.30664	1.31134
					568	90.6309	2.29791		568	0.095703	3.89676
					569	54.2197	2.38054		569	8.5752	1.37431
					570	76.1143	4.41705		570	5.99316	1.00908
					571	53.2646	3.18298		571	14.9854	3.60473
					572	72.001	2.78772		572	6.37598	1.6524
					573	96.5889	1.66038		573	8.33887	1.27784
					574	86.9307	4.33974		574	6.07715	2.27297
					575	55.8242	1.6242		575	2.24902	2.31067
					576	66.1875	2.19429		576	3.51367	2.32922
					577	76.4883	5.36608		577	4.57129	2.56198
					578	83.0156	1.71159		578	0.222656	1.25426
					579	45.5986	4.17053		579	3.55664	2.18706
					580	38.1191	1.23633		580	11.8633	1.88386
					581	41.4121	2.53164		581	2.72949	1.90146
					582	89.0811	5.23037		582	4.52832	3.24654
					583	7.58594	1.95039		583	27.415	3.40792
					584	36.1436	0.813721		584	4.13672	2.52144
					585	20.6816	-0.105402		585	0.145508	1.46285
					586	18.7607	3.08948		586	4.96094	0.627535
					587	31.002	3.62369		587	11.1523	1.90709
					588	17.542	-0.181573		588	8.03027	2.33788
					589	5.88965	4.00779		589	5.07812	2.59065
					590	31.1006	3.58373		590	9.79199	3.10824
					591	15.0879	3.68308		591	20.6982	1.28501
					592	11.8623	4.28211		592	4.16406	2.65948
					593	9.44336	3.02227		593	2.08106	0.906693
					594	37.0771	3.2715		594	2.69238	2.34654
					595	26.4463	3.34548		595	3.60547	2.67585
					596	49.3984	4.44356		596	17.7549	3.28696
					597	77.5215	2.75815		597	24.918	0.539224
					598	34.8848	2.84724		598	26.2822	1.82085
					599	27.5156	4.25083		599	32.8633	1.72344
					600	43.7441	4.42933		600	8.1416	1.57426
					601	41.4121	4.38224		601	0.322266	2.89025
					602	89.0811	3.68968		602	0.120117	2.35874
					603	7.58594	3.69405		603	8.90332	1.51155
					604	36.1436	2.35315		604	4.24023	1.71006
					605	20.6816	0.932141		605	2.04688	3.18664
					606	18.7607	3.32129		606	15.4785	3.79721
					607	31.002	3.84158		607	24.4541	2.34994
					608	17.542	3.7518		608	30.7168	1.8803
					609	5.88965	3.37574		609	0.875977	2.26911
					610	31.1006	4.24525		610	1.99316	6.80259
					611	15.0879	3.72963		611	5.92578	0.621982
					612	11.8623	2.56493		612	6.25684	1.3874
					613	9.44336	3.82265		613	6.20215	2.90256
					614	37.0771	5.00756		614	4.93848	0.866128
					615	26.4463	5.85663		615	9.5791	3.79842
					616	49.3984	0.00530073		616	5.74707	2.03241
					617	77.5215	3.24627		617	9.77246	1.62421
					618	34.8848	3.05699		618	1.9375	0.984183
					619	27.5156	5.3038		619	0.953125	0.955255
					620	43.7441	5.03545		620	3.30957	1.79027
					621	41.4121	3.3279		621	9.09375	3.33756
					622	89.0811	4.5386		622	0.477539	0.666383
					623	7.58594	4.06707		623	9.02148	2.12344
					624	36.1436	5.28613		624	11.5176	2.49775
					625	20.6816	3.3774		625	5.99316	0.831308
					626	18.7607	4.21312		626	2.03418	2.05143
					627	31.002	2.66023		627	6.07715	1.1481
					628	17.542	4.43953		628	2.92481	2.29402
					629	5.88965	5.69778		629	2.89062	2.62886
					630	31.1006	3.91972		630	22.7061	1.02286
					631	15.0879	4.64359		631	0.790039	2.69987
					632	11.8623	4.20151		632	3.00488	1.30907
					633	9.44336	4.01287		633	6.54883	1.00135
					634	37.0771	5.36		634	6.54883	2.33938
					635	26.4463	2.24855		635	0.25	0.74451
					636	49.3984	4.2569		636	3.24805	4.00872
					637	77.5215	0.884148		637	8.7832	0.566332
					638	34.8848	4.46921		638	2.91211	1.41833
					639	27.5156	5.08963		639	3.60352	0.613003
					640	43.7441	4.839		640	5.0459	2.89217
					641	41.4121	3.89543		641	6.13867	3.05695
					642	89.0811	4.21814		642	6.52832	1.77481
					643	7.58594	3.52283		643	4.75684	2.3478
					644	36.1436	4.13476		644	0.146484	3.95065
					645	20.6816	4.4454		645	1.51953	2.271
					646	18.7607	1.30039		646	0.212891	1.15649
					647	31.002	3.4179		647	3.43262	1.27863
					648	17.542	3.22975		648	1.96094	1.54125
					649	5.88965	3.62143		649	8.04004	2.72756
					650	31.1006	3.36556		650	2.87305	2.57302
					651	15.0879	3.91449		651	0.34668	1.36786
					652	11.8623	1.97592		652	5.86231	1.74263
					653	9.44336	4.09841		653	1.33887	4.25894
					654	37.0771	4.28789		654	1.33887	0.889228
					655	26.4463	1.17278		655	30.1016	1.48068
					656	49.3984	0.602546		656	1.86328	0.505018
					657	77.5215	3.70243		657	3.03516	1.55407
					658	34.8848	4.749		658	10.3809	3.89271
					659	27.5156	2.40398		659	1.05176	3.02247
					660	43.7441	5.33064		660	3.20117	0.990244
					661	41.4121	2.97599		661	2.40332	1.34842
					662	89.0811	5.29969		662	1.63477	3.60152
					663	7.58594	4.05718		663	6.06934	1.71245
					664	36.1436	-0.154587		664	0.820312	4.84063
					665	20.6816	0.716547		665	6.74023	1.4931
					666	18.7607	5.01486		666	4.19824	3.15522
					667	31.002	4.91808		667	0.217773	1.39917
					668	17.542	4.21877		668	8.45996	2.77259
					669	5.88965	5.62868		669	7.96484	1.70064
					670	31.1006	1.95171		670	3.17871	2.36518
					671	15.0879	3.34509		671	0.732422	2.14106
					672	11.8623	3.90077		672	0.503906	3.03325
					673	9.44336	3.41283		673	6.14844	2.97296
					674	37.0771	3.57181		674	6.14062	1.43536
					675	26.4463	-0.500633		675	3.29981	1.06273
					676	49.3984	2.47505		676	3.6875	1.37581
					677	77.5215	3.06943		677	3.06543	1.30026
					678	34.8848	1.21007		678	2.06543	0.906243
					679	27.5156	4.51157		679	6.20996	2.25001
					680	43.7441	4.29227		680	3.48144	2.38982
					681	41.4121	5.05077		681	0.03418	1.42466
					682	89.0811	4.02805		682	0.967773	0.555876
					683	7.58594	1.35369		683	0.095703	1.04046
					684	36.1436	4.74394		684	3.04688	3.26504
					685	20.6816	0.524629		685	9.02148	1.66748
					686	18.7607	0.607417		686	7.34863	1.89032
					687	31.002	2.48049		687	4.56738	3.33481
					688	17.542	4.02542		688	2.98926	2.46884
					689	5.88965	-0.0968503		689	0.931641	2.79445
					690	31.1006	1.61872		690	0.125	3.21514
					691	15.0879	3.53202		691	2.24902	2.46307
					692	11.8623	1.69993		692	0.514648	0.636996
					693	9.44336	2.26009		693	2.24902	3.09109
					694	37.0771	-0.100533		694	0.222656	1.57158
					695	26.4463	0.284056		695	3.11523	2.17197
					696	49.3984	0.0359381		696	3.97656	0.918893
					697	77.5215	3.48463		697	2.72949	2.28298
					698	34.8848	3.23413		698	4.52832	1.21971
					699	27.5156	0.508077		699	27.415	4.72244
					700	43.7441	3.97367		700	6.65527	2.45912
					701	41.4121	4.25141		701	16.6299	2.96423
					702	89.0811	-0.115791		702	6.43848	1.02182
					703	7.58594	1.01088		703	2.85254	2.05587
					704	36.1436	3.82416		704	15.7148	0.959694
					705	20.6816	3.97051		705	8.03027	1.00523
					706	18.7607	4.89495		706	7.30859	1.63033
					707	31.002	3.99232		707	5.07812	1.70282
					708	17.542	4.49722		708	2.91894	1.31015
					709	5.88965	2.93909		709	11.4365	1.65373
					710	31.1006	1.41337		710	5.32031	2.0909
					711	41.4121	0.243595		711	3.06543	1.95432
					712	89.0811	3.37666		712	0.212891	2.60225
					713	7.58594	4.54459		713	3.46484	3.84856
					714	36.1436	5.2122		714	0.136719	0.967696
					715	20.6816	2.98573		715	1.86133	0.779316
					716	18.7607	2.97654		716	1.84961	3.16116
					717	31.002	3.90531		717	6.08789	1.0779
					718	17.542	3.32647		718	1.46289	1.01838
					719	5.88965	0.467711		719	3.21875	0.791574
					720	31.1006	3.84805		720	0.322266	3.63018
					721	41.4121	0.916139		721	5.96289	3.55306
					722	89.0811	0.55599		722	1.36133	0.838493
					723	7.58594	-0.453979		723	2.54785	4.08097
					724	36.1436	4.19128		724	3.32519	3.44268
					725	20.6816	0.993548		725	16.7031	3.56819
					726	18.7607	0.773206		726	8.69629	3.07371
					727	31.002	2.83154		727	12.9766	1.87784
					728	17.542	1.0599		728	0.27832	3.49417
					729	5.88965	0.545442		729	2.94922	3.15006
					730	31.1006	2.53709		730	0.301758	2.93076
					731	41.4121	4.021		731	3.06543	3.85236
					732	89.0811	4.4373		732	6.18359	1.91239
					733	7.58594	1.76537		733	0.933594	3.22646
					734	36.1436	5.60601		734	5.04102	3.47152
					735	20.6816	2.44412		735	4.25977	4.08645
					736	18.7607	4.36952		736	3.08984	2.39573
					737	31.002	4.16207		737	6.50586	3.4639
					738	17.542	2.73798		738	1.32031	2.31391
					739	5.88965	2.97409		739	0.816406	0.987719
					740	31.1006	4.67948		740	1.00977	4.6525
					741	41.4121	3.89803		741	0.148437	1.01064
					742	89.0811	3.98789		742	5.17871	3.32586
					743	7.58594	2.93688		743	3.51367	1.77804
					744	36.1436	3.27601		744	0.222656	4.14232
					745	20.6816	5.81873		745	0.790039	4.55371
					746	18.7607	5.40894		746	0.523437	1.55295
					747	31.002	4.1607		747	9.6377	0.828911
					748	17.542	3.99333		748	3.00488	1.11823
					749	5.88965	2.91572		749	27.415	3.74249
					750	31.1006	3.75498		750	6.65527	0.509848
					751	41.4121	0.636767		751	3.72559	0.651887
					752	89.0811	4.49771		752	16.3975	0.665545
					753	7.58594	4.06556		753	2.97754	1.55764
					754	36.1436	0.99258		754	2.90527	2.30813
					755	20.6816	0.660739		755	13.4219	3.68228
					756	18.7607	4.68809		756	14.9844	1.99512
					757	31.002	4.17391		757	12.3633	2.815
					758	17.542	3.00218		758	1.38281	2.15813
					759	5.88965	3.59687		759	2.69238	2.0416
					760	31.1006	6.40301		760	6.39062	2.19098
									761	5.54394	2.31803
									762	32.8633	2.83887
									763	6.38477	3.02152
									764	8.34668	1.2167
									765	5.08301	5.14643
									766	12.5811	1.79089
									767	4.24023	3.75283
									768	0.913086	0.661855
									769	4.19824	4.70993
									770	5.60156	1.0995
									771	6.14844	3.36332
									772	4.23144	1.30866
									773	3.0918	1.04713
									774	3.18262	0.944608
									775	3.06543	1.1653
									776	0.295898	3.00398
									777	9.89746	1.19657
									778	3.42285	2.04457
									779	2.79688	1.6268
									780	9.77246	0.705691
									781	4.15625	2.06351
									782	4.30664	0.667033
									783	6.29102	0.575869
									784	9.09375	4.41524
									785	7.54492	1.18795
									786	3.41602	0.616665
									787	2.03418	1.16881
									788	6.31934	2.29412
									789	1.36133	2.0772
									790	2.24902	2.12867
									791	6.94043	1.18166
									792	0.222656	2.67408
									793	2.89062	1.5436
									794	3.97656	0.526713
									795	3.04688	1.44781
									796	2.72949	2.6119
									797	3.00488	4.84312
									798	27.415	2.31739
									799	7.01269	0.598001
									800	2.21387	1.81351
									801	4.13672	0.611025
									802	11.1523	3.01542
									803	2.89062	2.17456
									804	3.24316	0.966825
									805	4.77734	1.30842
									806	3.04394	2.36494
									807	14.3457	0.743668
									808	2.66211	2.89621
									809	4.75684	1.06483
									810	3.46484	3.22594
									811	3.00195	1.15037
									812	5.54394	3.55575
									813	2.29102	1.16165
									814	28.6221	2.51747
									815	0.176758	3.46606
									816	2.95801	1.41583
									817	0.322266	3.28151
									818	5.96289	2.28901
									819	5.41406	0.707422
									820	9.96191	3.54135
									821	0.047852	5.4643
									822	4.44434	4.08449
									823	1.85449	3.39228
									824	4.76562	0.664657
									825	2.94238	3.66663
									826	3.01269	2.6576
									827	1	0.57517
									828	3.01269	1.23372
									829	12.9053	2.45433
									830	2.28027	0.535147
									831	0.146484	2.71729
									832	8.78125	1.12101
									833	1	0.688949
									834	7.82129	1.08201
									835	6.57715	1.23313
									836	3.09961	1.47971
									837	0.980469	1.82563
									838	4.78613	2.12942
									839	3.38867	1.67426
									840	1.68359	2.68139
									841	3.65723	3.16932
									842	1.03418	0.50426
									843	1.17383	2.73881
									844	3.40625	3.69892
									845	0.745117	1.07107
									846	7.15527	3.46614
									847	1.83691	0.867203
									848	5.97461	1.18151
									849	3.68164	1.67109
									850	8.72754	4.56209
									851	7.58984	1.66039
									852	2.40039	0.954229
									853	1.52832	1.31595
									854	2.54102	2.47184
									855	3.06055	2.38031
									856	3.45117	4.18996
									857	11.7988	2.42557
									858	3.1582	1.22784
									859	3.43652	3.36588
									860	3.43652	1.05806
									861	5.20312	2.58781
									862	2.67871	0.562223
									863	6.94043	0.923888
									864	4.00684	3.30421
									865	18.7998	0.95822
									866	5.68555	2.18783
									867	8.9375	1.51404
									868	5.06641	2.85535
									869	5.82227	4.84044
									870	2.46875	0.91628
									871	5.09863	1.30052
									872	4.2666	1.37424
									873	8.05078	1.98106
									874	4.52246	5.05359
									875	5.41406	1.88468
									876	0.036133	3.00834
									877	2.00879	1.43528
									878	1.85449	1.19571
									879	5.64062	2.00215
									880	4.44141	1.60982
									881	8.78125	4.6905
									882	2.94727	4.46176
									883	3.09961	2.6836
									884	3.65723	3.4599
									885	9.95605	4.73475
									886	8.85352	1.01773
									887	3.04199	1.42012
									888	6.36816	2.48003
									889	0.150391	1.83543
									890	2.78223	0.861346
									891	9.1582	3.13829
									892	2.4375	1.5507
									893	0.910156	3.09325
									894	15.5771	4.22321
									895	6.35449	3.58686
									896	5.68555	2.59568
									897	3.3584	3.05718
									898	2.71387	3.40746
									899	5.84277	0.840737
									900	7.93066	2.88291
									901	2.94141	1.7114
									902	2.99219	3.05347
									903	8.375	1.25432
									904	3.59961	1.56039
									905	5.15039	2.19022
									906	3.78223	4.0046
									907	1.85449	2.21418
									908	5.64062	2.52498
									909	1	0.996814
									910	3.39453	1.51354
									911	0.535156	0.606871
									912	0.681641	3.94263
									913	1.33887	1.36469
									914	0.042969	1.31301
									915	0.183594	1.76944
									916	3.09961	1.34275
									917	9.65039	1.82693
									918	5.70606	2.03245
									919	4.78613	4.0535
									920	10.8018	0.611117
									921	1.68359	2.71272
									922	2.83301	2.28986
									923	1.17383	2.02652
									924	9.95605	1.87067
									925	7.15527	2.19389
									926	0.603516	0.889611
									927	5.97461	1.86982
									928	3.68164	0.968303
									929	9.1582	4.11852
									930	2.88477	1.20613
									931	1.75195	1.18026
									932	0.549805	2.64329
									933	1.52832	1.84834
									934	2.54102	0.953754
									935	1.63867	2.35101
									936	2.56445	3.58207
									937	3.45117	1.81965
									938	1.06543	1.02859
									939	10.458	2.2286
									940	3.37305	0.969711
									941	7.50977	0.603456
									942	3.12012	2.22019
									943	3.3584	1.80825
									944	1.99512	1.19314
									945	1.84668	1.06597
									946	5.84277	2.11708
									947	10.7803	1.53245
									948	7.93066	1.67271
									949	2.24902	0.767828
									950	1.77148	2.58971
									951	0.036133	0.626963
									952	2.87207	4.51395
									953	1.58789	3.41047
									954	3.01269	1.14095
									955	4.01269	1.57735
									956	0.265625	4.38632
									957	10.8262	1.51296
									958	0.535156	1.76973
									959	8.78125	2.70164
									960	11.7012	2.27661
									961	2.94727	3.4859
									962	3.16309	2.87857
									963	3.23731	2.85589
									964	3.37109	2.59905
									965	13.1934	1.6091
									966	5.76953	1.71752
									967	3.19043	4.27099
									968	1.26172	0.801602
									969	0.52832	1.80429
									970	6.69141	4.15159
									971	10.2588	1.61147
									972	8.85352	0.672952
									973	20.3662	0.66812
									974	6.36816	3.41506
									975	11.5176	1.67177
									976	0.257812	2.0053
									977	8.72754	2.26483
									978	7.58984	2.89075
									979	1.75195	3.70023
									980	0.910156	3.85945
									981	1.46289	1.78572
									982	2.61816	0.922375
									983	6.02148	1.8834
									984	6.35449	3.49045
									985	2.32519	2.70043
									986	3.11035	2.63142
									987	5.82227	3.99362
									988	5.70996	2.90037
									989	5.09863	1.78086
									990	2.24902	1.84926
									991	3.40527	0.754843
									992	8.375	3.63431
									993	5.15039	1.51743
									994	5.86133	2.19782
									995	5.64062	0.952911
									996	3.42969	2.58017
									997	1.30957	1.52653
									998	0.055664	5.55339
									999	9.49023	4.06512
									1000	3.16309	2.29333
									1001	2.75781	5.00495
									1002	4.78613	1.95906
									1003	3.38867	2.01991
									1004	1.68359	3.96062
									1005	2.54883	0.822168
									1006	1.17383	3.50236
									1007	0.52832	1.65724
									1008	5.91211	0.689397
									1009	1.83691	2.30768
									1010	7.01562	2.59163
									1011	14.1465	4.66582
									1012	9.0957	1.02542
									1013	0.549805	1.26174
									1014	0.910156	3.1534
									1015	3.00781	0.742478
									1016	3.06055	2.91331
									1017	6.13867	2.6607
									1018	3.1582	2.0447
									1019	3.22949	3.1905
									1020	8.52051	0.775177
									1021	3.37305	2.97872
									1022	3.12012	2.19394
									1023	1.99512	2.14632
									1024	5.06641	3.4229
									1025	1.84668	1.97964
									1026	10.7803	3.1222
									1027	7.93066	1.45045
									1028	0.09375	2.10733
									1029	6.09473	0.881716
									1030	4.02344	1.06015
									1031	8.19043	2.08962
									1032	2.74902	4.10479
									1033	1.42578	1.24166
									1034	1.33691	2.36432
									1035	3.51172	0.511647
									1036	1.58789	5.42464
									1037	1.58594	1.1529
									1038	1	2.09658
									1039	0.265625	2.21581
									1040	0.535156	5.55447
									1041	12.292	0.84712
									1042	1.33887	2.36139
									1043	6.9541	4.20025
									1044	0.737305	0.821249
									1045	2.68652	1.53189
									1046	8.50391	3.51023
									1047	4.96094	1.20819
									1048	0.887695	2.06317
									1049	2.41406	2.44093
									1050	4.0625	7.16978
									1051	11.3066	0.855078
									1052	3.15918	2.03523
									1053	8.75879	1.9521
									1054	4.30469	3.4602
									1055	3.23438	1.61698
									1056	3.36621	0.585185
									1057	2.15332	1.96255
									1058	4.69727	0.646405
									1059	1.36328	1.20358
									1060	1.25879	1.67737
									1061	9.1582	3.12404
									1062	0.03418	1.15788
									1063	1.01172	2.51245
									1064	7.02539	2.66417
									1065	0.02832	1.14118
									1066	2.99219	0.688806
									1067	0.978516	0.903479
									1068	2.96191	1.44678
									1069	5.70019	1.50307
									1070	3.70606	3.2875
									1071	3.04394	0.834294
									1072	3.21094	0.75433
									1073	3.56641	0.505816
									1074	12.8838	0.591996
									1075	3.29004	1.34888
									1076	1.43359	2.03284
									1077	4.78711	1.3273
									1078	7.50977	0.919937
									1079	5.31543	1.02754
									1080	5.93359	2.13849
									1081	4.49219	3.13676
									1082	17.0566	1.72571
									1083	3.48438	0.540757
									1084	2.88086	2.18033
									1085	2.94141	0.880531
									1086	2.82031	1.35587
									1087	2.51953	0.63563
									1088	5.0459	1.46409
									1089	2.24902	1.62243
									1090	9.96191	3.00157
									1091	2.74902	2.95445
									1092	2.41406	0.965909
									1093	0.59082	1.46804
									1094	2.30957	2.81589
									1095	3.55469	1.52531
									1096	1.62793	0.722537
									1097	7.33496	1.22236
									1098	5.35547	0.541025
									1099	2.28027	1.03615
									1100	1.44238	1.3618
									1101	3.4375	1.43488
									1102	2.94141	3.06536
									1103	5.86133	3.0163
									1104	3.16309	0.594601
									1105	2.81543	1.72732
									1106	6.90723	0.695132
									1107	9.49023	1.21192
									1108	0.59082	1.39644
									1109	3.01269	2.01568
									1110	2.69824	1.5701
									1111	0.96582	0.92212
									1112	0.183594	1.44384
									1113	8.70312	2.75727
									1114	5.70606	1.70563
									1115	6.17578	0.637184
									1116	0.980469	2.63516
									1117	1.42578	1.24167
									1118	13.9961	1.55002
									1119	8.17676	1.01776
									1120	2.89453	4.21221
									1121	1.26172	1.10304
									1122	7.59277	2.05739
									1123	2.91211	1.89461
									1124	5.79199	2.95735
									1125	9.50684	0.699888
									1126	10.2588	1.66981
									1127	2.15332	1.24114
									1128	7.31348	2.4404
									1129	1.36328	2.86093
									1130	1.84668	1.78568
									1131	4.70312	0.821762
									1132	0.603516	0.968573
									1133	0.603516	0.918555
									1134	3.3457	1.6398
									1135	3.68164	0.839955
									1136	14.1465	1.00462
									1137	7.02539	2.18111
									1138	9.16406	0.671102
									1139	0.02832	1.47629
									1140	0.111328	0.795911
									1141	2.01367	2.5552
									1142	8.26172	1.97575
									1143	12.3369	0.523522
									1144	3.55566	1.66625
									1145	3.59863	2.84664
									1146	3.76856	2.13806
									1147	12.1104	1.23128
									1148	5.89062	1.54468
									1149	2.1582	2.19992
									1150	4.73438	1.12063
									1151	3.50586	1.59261
									1152	5.28516	2.32091
									1153	1.41309	3.53264
									1154	13.8828	1.55404
									1155	1.0957	1.04726
									1156	5.84277	1.6869
									1157	2.75293	0.721915
									1158	4.2666	1.61887
									1159	3.23535	4.03929
									1160	2.40527	3.63983
									1161	2.74902	2.7971
									1162	5.60254	2.2944
									1163	0.59082	3.25504
									1164	0.59082	1.43817
									1165	1.58789	3.86869
									1166	9.48438	3.92795
									1167	3.4375	1.19785
									1168	4.70312	1.2312
									1169	4.76562	1.87542
									1170	5.87695	2.81002
									1171	5.4082	0.969916
									1172	2.69824	2.80298
									1173	0.535156	0.570547
									1174	3.01465	1.0109
									1175	0.055664	2.1415
									1176	0.039062	0.515102
									1177	1.42578	0.686407
									1178	3.24219	1.79164
									1179	12.8301	0.587424
									1180	3.01269	1.19018
									1181	2.69824	2.69405
									1182	2.82519	0.878276
									1183	3.42481	2.11806
									1184	0.887695	1.68718
									1185	0.980469	0.570714
									1186	6.71094	3.0196
									1187	3.15918	3.44982
									1188	3.02246	3.73621
									1189	0.146484	3.29692
									1190	9.69238	4.00699
									1191	8.43262	2.35699
									1192	4.56836	1.63214
									1193	1.625	0.60788
									1194	1.36328	2.66012
									1195	6.92676	1.02832
									1196	4.70312	0.580712
									1197	6.8125	1.69155
									1198	5.93262	6.5466
									1199	6.09766	1.25773
									1200	3.08106	2.31667
									1201	8.82715	3.11134
									1202	2.96191	2.89333
									1203	1.37695	3.39295
									1204	6.375	5.83222
									1205	1.45801	2.02672
									1206	3.15137	0.67945
									1207	22.0342	1.81668
									1208	3.59863	1.71934
									1209	0.446289	0.826043
									1210	1.43359	3.54909
									1211	4.40723	1.58543
									1212	2.1582	1.11606
									1213	5.35156	0.982973
									1214	1.4707	1.06606
									1215	9.71973	0.730058
									1216	4.35156	2.04705
									1217	5.28516	2.1207
									1218	2.46875	2.86951
									1219	2.34277	3.23841
									1220	6.49316	1.94129
									1221	4.01465	2.93747
									1222	6.26269	1.24516
									1223	3.23535	1.66366
									1224	3.40527	0.816166
									1225	2.40527	2.84087
									1226	1.42578	2.55631
									1227	0.036133	1.58261
									1228	1.58789	2.7991
									1229	3.09961	3.21147
									1230	3.16309	4.2064
									1231	4.56445	1.30496
									1232	6.90723	1.51429
									1233	3.09375	0.602444
									1234	21.3213	2.57423
									1235	8.50391	4.09068
									1236	2.74316	0.863836
									1237	5.21191	2.88612
									1238	2.41406	1.59835
									1239	11.9629	0.660657
									1240	5.79199	3.28445
									1241	0.52832	2.736
									1242	18.9355	2.42065
									1243	3.40625	1.37926
									1244	9.00879	3.16788
									1245	6.36816	2.70513
									1246	9.1582	2.73107
									1247	2.31836	2.74654
									1248	1.33106	0.826862
									1249	0.910156	0.745995
									1250	3.4707	1.20081
									1251	2.56445	1.20779
									1252	1.39062	1.87233
									1253	6.35449	2.20496
									1254	2.32519	2.40987
									1255	10.458	3.1926
									1256	0.455078	1.13641
									1257	5.06641	0.627194
									1258	5.82227	3.4207
									1259	0.785156	3.19643
									1260	2.24902	1.79016
									1261	3.40527	0.50802
									1262	1.37598	0.789847
									1263	3.55469	1.22879
									1264	1.85449	4.29939
									1265	3.01269	0.640017
									1266	5.86133	0.703327
									1267	2.94238	2.64103
									1268	3.01269	1.21016
									1269	3.16309	1.09888
									1270	3.39453	4.28022
									1271	12.2881	0.895164
									1272	9.49023	3.83421
									1273	0.992187	3.15417
									1274	2.29394	0.674737
									1275	1.55566	1.81896
									1276	2.94727	4.95814
									1277	5.85644	2.42613
									1278	3.28809	0.70987
									1279	0.96582	1.19199
									1280	0.96582	2.50757
									1281	0.887695	1.7759
									1282	10.4326	2.2871
									1283	5.70606	1.88874
									1284	3.65723	0.674781
									1285	4.44434	3.3449
									1286	0.980469	1.84185
									1287	3.69629	3.07426
									1288	3.15918	1.15228
									1289	3.2832	0.875864
									1290	10.2588	2.32752
									1291	1.83691	2.9964
									1292	7.01562	1.08178
									1293	6.05566	1.75359
									1294	9.64453	1.01085
									1295	9.1582	2.62434
									1296	2.00684	1.07415
									1297	0.549805	2.3488
									1298	2.99219	0.527662
									1299	2.96191	2.22357
									1300	2.56445	2.4925
									1301	5.47656	0.50947
									1302	3.1582	0.926904
									1303	3.43652	0.533637
									1304	3.15137	2.68816
									1305	1.43359	1.84322
									1306	2.1582	3.36611
									1307	3.12012	3.64942
									1308	5.28516	0.817848
									1309	1.99512	1.95022
									1310	5.84277	3.27748
									1311	2.22168	2.94354
									1312	7.93066	0.88387
									1313	0.817383	0.744092
									1314	7.04199	2.25063
									1315	3.40527	2.95531
									1316	9.96191	1.09247
									1317	2.74902	3.44534
									1318	1.42578	3.65603
									1319	1.37598	2.25215
									1320	1.58789	1.53717
									1321	4.44434	1.74378
									1322	3.4375	4.06883
									1323	0.910156	3.36588
									1324	9.49023	2.3701
									1325	2.68652	3.55509
									1326	0.183594	3.99859
									1327	8.70312	3.5096
									1328	6.29004	2.81022
									1329	3.15918	3.15684
									1330	0.525391	2.56358
									1331	1.25879	0.80491
									1332	8.85352	1.77012
									1333	5.91211	0.602614
									1334	7.31348	2.70237
									1335	2.71973	1.39127
									1336	2.36816	3.8497
									1337	0.03418	1.20041
									1338	10.6279	0.702542
									1339	2.56445	3.26117
									1340	1.34668	1.9967
									1341	7.61426	3.86747
									1342	4.4668	3.14921
									1343	4.73438	2.96562
									1344	15.6035	0.649946
									1345	13.8828	1.40882
									1346	2.88086	2.09988
									1347	12.9258	2.61459
									1348	5.70898	2.23204
									1349	7.04199	3.61092
									1350	3.40527	2.1303
									1351	2.40527	1.44805
									1352	1.42578	3.06235
									1353	6.07324	1.93908
									1354	0.036133	0.521438
									1355	1.33398	0.502571
									1356	3.78223	2.03876
									1357	1.58789	1.97062
									1358	3.09961	0.970196
									1359	6.90723	1.43938
									1360	0.146484	1.32139
									1361	3.56055	0.808311
									1362	3.80664	1.24162
									1363	10.8672	1.47603
									1364	7.66016	1.9925
									1365	0.183594	0.969224
									1366	5.92773	1.39906
									1367	4.96094	0.684691
									1368	2.36133	1.92756
									1369	1.12891	1.16874
									1370	5.21191	2.62338
									1371	2.41406	1.41222
									1372	11.9629	0.506147
									1373	3.02734	2.25124
									1374	5.79199	3.90029
									1375	9.90723	4.67372
									1376	6.01269	0.666235
									1377	10.7705	0.578225
									1378	3.40625	1.44422
									1379	5.91211	1.56593
									1380	7.31348	1.87093
									1381	1.83691	2.96564
									1382	1.36328	0.538698
									1383	3.40918	1.23149
									1384	0.603516	0.696135
									1385	3.06055	1.28755
									1386	3.68164	1.07652
									1387	2.78223	1.93337
									1388	14.1465	2.62753
									1389	7.02539	3.11636
									1390	2.54492	2.08492
									1391	0.673828	2.07083
									1392	3.00781	2.7685
									1393	3.06055	3.41974
									1394	3.45117	0.724223
									1395	6.2168	0.582868
									1396	0.55957	0.694048
									1397	2.32519	3.17228
									1398	10.458	3.06232
									1399	5.89062	1.5051
									1400	1.41309	0.525417
									1401	1.49512	2.6867
									1402	13.8828	2.32342
									1403	11.7461	1.51199
									1404	2.27832	0.590181
									1405	0.785156	3.29529
									1406	2.51953	2.64541
									1407	4.01465	2.84901
									1408	2.74902	1.85956
									1409	8.375	3.28486
									1410	2.87207	2.5871
									1411	1.58789	2.76206
									1412	5.64062	0.541935
									1413	2.94141	0.715857
									1414	3.01269	3.41872
									1415	0.265625	3.64659
									1416	4.56445	1.48644
									1417	24.0049	0.98321
									1418	1.51269	3.96959
									1419	0.535156	1.74762
									1420	3.9707	0.821625
									1421	9.49023	3.29256
									1422	3.16309	4.31098
									1423	3.23731	1.76827
									1424	4.78613	2.09988
									1425	13.1934	3.05854
									1426	7.63769	1.0183
									1427	5.76953	5.4103
									1428	3.65723	2.51515
									1429	9.90723	2.39465
									1430	6.69141	2.86085
									1431	8.85352	2.09445
									1432	9.00879	1.77323
									1433	1.38769	2.44975
									1434	8.72754	4.2574
									1435	1.0166	1.47045
									1436	3.95801	2.45634
									1437	3.21875	2.83062
									1438	4.93359	3.28916
									1439	5.94629	1.28908
									1440	6.02148	1.79778
									1441	3.03906	1.10274
									1442	6.35449	1.57947
									1443	2.32519	2.79421
									1444	3.89746	3.68493
									1445	1.45606	0.527206
									1446	3.11035	2.21852
									1447	1.23438	2.45427
									1448	5.82227	1.93861
									1449	5.82227	0.505992
									1450	5.70996	1.48628
									1451	5.30762	0.524914
									1452	2.51953	0.970216
									1453	4.01465	3.03109
									1454	3.40527	0.522974
									1455	6.42871	2.03042
									1456	12.332	3.63832
									1457	2.13086	0.782364
									1458	0.59082	0.783301
									1459	1.38281	3.39845
									1460	5.86133	1.05908
									1461	3.95508	1.80099
									1462	3.16309	0.69091
									1463	3.16309	3.18065
									1464	7.09668	0.76565
									1465	2.81543	3.70574
									1466	6.84375	3.89123
									1467	1.44629	1.53107
									1468	10.002	1.76337
									1469	0.146484	1.93721
									1470	9.49023	0.833027
									1471	0.992187	2.97083
									1472	0.042969	1.14146
									1473	18.8535	0.95932
									1474	2.36133	1.38692
									1475	11.3066	1.59535
									1476	3.02734	0.963107
									1477	2.74219	1.71124
									1478	2.71484	3.07543
									1479	1.25879	1.41331
									1480	30.793	1.90607
									1481	3.40625	1.39296
									1482	11.7881	0.875035
									1483	1.94629	0.511548
									1484	5.45801	2.08399
									1485	3.40918	1.92216
									1486	2.09375	0.740172
									1487	3.51367	2.63985
									1488	0.053711	1.06443
									1489	1.02539	1.03095
									1490	5.06641	0.666647
									1491	9.1582	1.10787
									1492	0.03418	2.82634
									1493	1.0166	2.66567
									1494	2.31836	1.58772
									1495	2.01367	0.555335
									1496	9.31055	6.75466
									1497	4.93359	1.38931
									1498	1.4209	0.62693
									1499	15.5771	3.47014
									1500	3.45117	2.803
									1501	1.54688	1.43281
									1502	3.21094	2.01975
									1503	3.18164	1.06459
									1504	6.35449	3.45362
									1505	3.47559	1.76734
									1506	2.1582	2.66832
									1507	2.00684	3.8315
									1508	2.76269	1.05733
									1509	1.49512	1.91474
									1510	5.06641	0.803132
									1511	2.26856	1.01814
									1512	5.69824	2.68252
									1513	5.82227	1.21682
									1514	2.46875	0.631187
									1515	6.10644	1.27198
									1516	12.9258	2.10944
									1517	2.82031	1.12981
									1518	2.27832	0.66092
									1519	2.82031	2.21212
									1520	3.02734	1.04496
									1521	1.94531	1.43167
									1522	6.07324	3.6807
									1523	8.375	1.90429
									1524	3.59961	1.42908
									1525	3.78223	4.04429
									1526	1.58789	4.11738
									1527	1.58594	1.2407
									1528	8.87402	3.67726
									1529	4.56445	2.80941
									1530	1.51269	1.45928
									1531	2.78223	1.13831
									1532	1.33887	3.03261
									1533	1.5332	1.56769
									1534	0.042969	1.04149
									1535	18.8535	4.00124
									1536	2.69824	1.95772
									1537	3.23731	1.92604
									1538	2.75781	1.68858
									1539	4.78613	3.63797
									1540	1.42578	0.862348
									1541	1.68359	1.74022
									1542	5.59277	1.30998
									1543	3.03906	2.08288
									1544	3.65723	3.95798
									1545	3.2832	1.6587
									1546	9.62402	0.996481
									1547	1.85742	1.38532
									1548	3.01465	1.31064
									1549	3.68164	2.73956
									1550	2.30566	1.28379
									1551	8.72754	2.19554
									1552	9.0957	2.27756
									1553	2.4375	2.4949
									1554	1.75195	2.28277
									1555	9.31055	0.688533
									1556	0.910156	0.840364
									1557	3.4707	3.49787
									1558	15.5771	1.91287
									1559	7.60742	0.601282
									1560	6.02148	0.753815
									1561	12.8838	1.22652
									1562	0.455078	0.689333
									1563	3.12012	1.40515
									1564	3.3584	2.71491
									1565	5.06641	2.79282
									1566	12.8281	0.95265
									1567	2.71387	1.62729
									1568	2.26856	0.716102
									1569	8.95312	0.880189
									1570	5.84277	0.633159
									1571	2.75293	0.906753
									1572	0.229492	1.1094
									1573	5.69824	1.63853
									1574	5.30762	1.71193
									1575	5.51758	1.04604
									1576	3.43945	3.70764
									1577	58.7627	4.75787
									1578	167.729	1.64129
									1579	6.74707	3.49989
									1580	1.57031	2.92187
									1581	0.262695	2.21507
									1582	0.942383	2.93406
									1583	0.298828	0.989173
									1584	2.64941	3.33323
									1585	3.43457	4.17363
									1586	2.98047	2.30732
									1587	0.4375	4.60111
									1588	7.15918	3.7006
									1589	2.18262	1.26881
									1590	2.01562	2.58335
									1591	1.65332	4.029
									1592	3.24609	4.07354
									1593	0.708984	3.42311
									1594	2.22559	2.48311
									1595	3.66113	2.9987
									1596	6.42285	2.22504
									1597	3.25586	3.67927
									1598	4.09863	0.550169
									1599	5.37695	2.66488
									1600	3.39453	1.6652
									1601	3.43945	5.11692
									1602	3.91797	2.94015
									1603	248.37	2.50488
									1604	10.2422	0.870011
									1605	3.90332	4.07681
									1606	4.01856	3.91589
									1607	4.86621	1.59792
									1608	0.143555	3.18266
									1609	0.068359	4.03422
									1610	8.91699	0.750591
									1611	3.34863	1.32638
									1612	0.801758	1.47856
									1613	5.91113	2.26936
									1614	0.323242	3.67167
									1615	0.368164	1.86059
									1616	3.53809	0.584744
									1617	0.4375	2.15448
									1618	3.89356	0.922321
									1619	3.25781	1.29072
									1620	1.62988	1.25115
									1621	2.94043	1.29368
									1622	2.22559	4.24465
									1623	3.6582	1.96194
									1624	6.42285	2.0635
									1625	3.25586	5.37814
									1626	0.665039	2.73032
									1627	6.94824	1.33738
									1628	3.43945	2.56537
									1629	248.37	5.72013
									1630	3.13672	0.600914
									1631	10.6416	3.81318
									1632	3.9043	0.771199
									1633	1.57031	1.6874
									1634	2.21094	1.09458
									1635	3.90332	1.20291
									1636	3.1582	0.566809
									1637	0.262695	1.05861
									1638	3.33106	1.24022
									1639	0.102539	1.53282
									1640	3.49414	0.548967
									1641	7.5791	2.95362
									1642	9.35059	2.34608
									1643	0.323242	2.1327
									1644	0.4375	1.32581
									1645	3.16504	1.23521
									1646	1.65332	3.02169
									1647	2.22559	1.88329
									1648	0.741211	2.36819
									1649	1.62988	1.877
									1650	1.52441	4.69563
									1651	0.427734	1.34005
									1652	3.66113	3.84323
									1653	2.22559	0.681698
									1654	6.94824	4.21625
									1655	3.43945	3.8688
									1656	48.0244	5.32124
									1657	6.74707	2.47383
									1658	0.262695	3.16633
									1659	0.942383	2.74684
									1660	0.298828	1.13599
									1661	2.64941	3.72302
									1662	5.91113	3.95533
									1663	4.08789	3.51066
									1664	2.98047	2.08412
									1665	0.4375	4.1873
									1666	7.15918	3.63495
									1667	9.41895	2.12961
									1668	2.01562	3.18195
									1669	1.65332	3.39192
									1670	3.24609	4.19455
									1671	3.66113	2.05042
									1672	2.22559	2.35163
									1673	3.66113	2.53938
									1674	3.5791	1.23299
									1675	3.25586	1.2456
									1676	3.25586	2.88947
									1677	1.10352	2.31493
									1678	0.131836	2.00691
									1679	0.385742	1.97947
									1680	5.75391	2.64474
									1681	5.51758	1.68649
									1682	3.79688	3.13256
									1683	8.7959	0.871796
									1684	2.92481	0.975032
									1685	13.5479	2.23038
									1686	0.166992	3.43811
									1687	2.76758	2.8632
									1688	0.323242	1.74067
									1689	7.80957	2.36894
									1690	1.00098	2.72815
									1691	10.7451	1.2671
									1692	0.009766	2.36016
									1693	3.66113	2.6795
									1694	0.72168	2.13862
									1695	3.66113	4.10329
									1696	3.17188	3.16419
									1697	0.923828	1.32496
									1698	4.96191	2.09252
									1699	13.0645	2.66744
									1700	7.32812	3.23629
									1701	6.94824	3.14127
									1702	1.32227	1.86501
									1703	3.91797	1.00503
									1704	58.7627	2.72854
									1705	18.7031	3.42121
									1706	3.78711	0.82108
									1707	2.92481	1.70181
									1708	5.99707	3.03785
									1709	3.16894	3.22126
									1710	3.60352	0.698543
									1711	3.49121	1.95624
									1712	10.7451	2.12379
									1713	0.009766	1.80189
									1714	3.64844	0.627302
									1715	2.22559	4.61798
									1716	3.66113	3.76058
									1717	4.15137	4.76095
									1718	0.931641	1.35256
									1719	1.10352	1.32167
									1720	1.14356	3.6944
									1721	5.75391	2.54797
									1722	7.32812	1.83847
									1723	5.51758	3.36459
									1724	3.91797	3.06622
									1725	58.7627	1.44123
									1726	19.8125	1.0895
									1727	7.29981	2.82299
									1728	4.01856	4.35259
									1729	7.42969	1.50837
									1730	0.675781	0.912986
									1731	8.8877	0.510073
									1732	2.15039	0.753146
									1733	8.57422	0.785648
									1734	3.16894	3.08811
									1735	0.4375	3.07778
									1736	2.01562	3.05662
									1737	3.49609	3.79919
									1738	0.270508	4.52646
									1739	2.17188	3.22321
									1740	3.17188	1.5855
									1741	3.25586	0.790753
									1742	5.66992	1.49151
									1743	4.15137	3.71686
									1744	1.10352	1.94389
									1745	5.75391	4.71149
									1746	3.61914	4.5246
									1747	3.46777	0.817174
									1748	5.51758	1.03483
									1749	4.84375	3.90689
									1750	3.43945	2.94712
									1751	3.91797	1.43975
									1752	10.6416	2.73038
									1753	2.21094	0.85935
									1754	1.08887	1.15724
									1755	7.42969	0.914385
									1756	0.942383	1.22761
									1757	0.102539	3.62975
									1758	6.67871	1.62228
									1759	0.675781	1.94179
									1760	10.3564	0.646344
									1761	8.57422	4.06568
									1762	0.171875	1.52171
									1763	1.00098	3.28744
									1764	2.81055	3.09657
									1765	17.542	2.1997
									1766	0.711914	2.39704
									1767	0.270508	3.81793
									1768	0.711914	2.30351
									1769	0.72168	1.43006
									1770	31.1006	2.18871
									1771	6.42285	2.52331
									1772	3.25586	1.13552
									1773	1.05469	3.61096
									1774	5.11816	0.576216
									1775	1.03809	2.84757
									1776	0.923828	2.96302
									1777	4.46777	1.93142
									1778	3.11621	2.50243
									1779	7.32812	5.79195
									1780	3.42676	0.755979
									1781	6.94824	1.92401
									1782	6.88867	3.06934
									1783	3.75293	1.37621
									1784	48.0244	2.10334
									1785	18.7031	0.547057
									1786	2.16016	1.6121
									1787	3.33106	1.6585
									1788	12.1406	3.28125
									1789	3.11133	1.98873
									1790	3.60352	3.67878
									1791	0.100586	1.38766
									1792	14.2686	2.21875
									1793	0.009766	2.56158
									1794	0.708984	2.32518
									1795	4.39746	0.674261
									1796	1.03809	2.93368
									1797	6.80469	1.79946
									1798	4.46777	1.45794
									1799	0.478516	3.81237
									1800	5.75391	1.79195
									1801	7.32812	4.16597
									1802	3.42676	0.964782
									1803	6.94824	2.88238
									1804	3.43945	2.94336
									1805	3.75293	4.67068
									1806	48.0244	2.27876
									1807	18.7031	0.873266
									1808	2.16016	1.6615
									1809	12.1406	3.78989
									1810	3.11133	0.876
									1811	5.99707	1.38216
									1812	0.151367	1.59222
									1813	4.92676	1.33455
									1814	0.100586	1.17947
									1815	17.542	1.57324
									1816	3.4375	1.15161
									1817	0.009766	3.70621
									1818	0.708984	1.25031
									1819	0.708984	2.31955
									1820	3.66113	3.04498
									1821	1.7666	2.94701
									1822	5.75391	1.88075
									1823	5.51758	2.8981
									1824	3.43945	2.63993
									1825	248.37	1.68172
									1826	19.8125	2.06379
									1827	6.74707	2.50127
									1828	1.04785	0.596269
									1829	3.90332	0.611778
									1830	3.1582	0.916304
									1831	4.01856	2.85969
									1832	3.06836	2.86946
									1833	3.35352	2.252
									1834	0.068359	2.93734
									1835	9.91406	1.46839
									1836	3.34863	3.33518
									1837	5.91113	3.06847
									1838	3.7334	0.62686
									1839	10.3193	1.56563
									1840	3.16894	2.75826
									1841	0.368164	3.94537
									1842	3.48926	3.18966
									1843	1.36035	3.57166
									1844	3.63379	1.73317
									1845	3.49609	1.85988
									1846	3.49609	0.910376
									1847	3.49609	1.44004
									1848	3.38672	2.01956
									1849	3.24609	2.27422
									1850	2.22852	1.93393
									1851	2.22559	1.64167
									1852	2.22559	2.81849
									1853	6.42285	2.89591
									1854	1.03809	1.85059
									1855	1.10352	2.17744
									1856	5.75391	2.07612
									1857	6.94824	4.5236
									1858	4.84375	2.16942
									1859	3.75293	2.41311
									1860	5.69531	2.47874
									1861	0.185547	2.10539
									1862	1.08887	3.27409
									1863	1.16699	2.89608
									1864	1.21777	3.00224
									1865	0.102539	0.586908
									1866	0.166992	2.94892
									1867	10.3564	2.86765
									1868	2.98047	1.25013
									1869	3.82031	2.25638
									1870	0.100586	0.9221
									1871	2.81055	5.51222
									1872	0.009766	2.46937
									1873	0.708984	0.54195
									1874	0.711914	2.74274
									1875	3.66113	0.502849
									1876	2.22559	3.70364
									1877	31.1006	2.42266
									1878	4.03027	1.29323
									1879	6.96582	3.08369
									1880	0.665039	3.45863
									1881	3.42676	2.8007
									1882	6.94824	7.22184
									1883	0.132812	0.690089
									1884	3.75293	2.85287
									1885	167.729	1.26226
									1886	0.270508	0.916873
									1887	15.6494	3.02712
									1888	0.697266	3.03772
									1889	0.262695	2.85599
									1890	11.5068	2.99474
									1891	3.51562	4.72874
									1892	2.92481	2.51191
									1893	8.57422	5.60365
									1894	1.73438	2.73015
									1895	0.407227	3.33718
									1896	2.01562	2.41832
									1897	1.0957	3.2133
									1898	3.49609	0.631241
									1899	3.09375	4.95812
									1900	3.6582	2.92783
									1901	3.6582	5.2792
									1902	0.21582	3.22814
									1903	0.131836	1.94474
									1904	1.7666	0.728544
									1905	3.42676	6.47667
									1906	6.94824	3.06556
									1907	3.57227	1.2825
									1908	48.0244	0.758808
									1909	61.834	2.01298
									1910	19.8125	3.4475
									1911	0.464844	2.2587
									1912	6.74707	4.99878
									1913	2.78516	3.18364
									1914	0.369141	6.26191
									1915	0.675781	4.47491
									1916	2.09375	0.917782
									1917	3.82031	2.51293
									1918	9.41895	3.51229
									1919	7.39356	1.50884
									1920	2.77637	0.801321
									1921	3.49609	2.53924
									1922	3.68066	1.79239
									1923	3.35938	2.44326
									1924	3.24609	2.01476
									1925	3.86035	3.48084
									1926	0.708984	1.19516
									1927	3.66113	2.13163
									1928	3.66113	1.65281
									1929	3.7168	1.49491
									1930	0.931641	4.27273
									1931	1.10352	1.69054
									1932	5.75391	5.70846
									1933	13.0645	0.936813
									1934	5.51758	2.6584
									1935	6.88867	3.98005
									1936	18.7031	2.56871
									1937	7.29981	2.28858
									1938	6.1543	0.999767
									1939	3.24512	4.3858
									1940	4.01856	0.674625
									1941	3.78027	2.15661
									1942	0.068359	2.17264
									1943	0.675781	1.83209
									1944	3.85352	0.841735
									1945	8.57422	1.99448
									1946	0.4375	3.4277
									1947	3.10059	1.43226
									1948	4.71289	1.88191
									1949	2.79199	0.871185
									1950	3.49902	2.95264
									1951	1.00098	2.94451
									1952	2.81055	3.54762
									1953	10.7451	1.0898
									1954	0.009766	2.62384
									1955	0.711914	2.05198
									1956	0.009766	2.07064
									1957	0.711914	1.79106
									1958	2.94922	0.916998
									1959	2.22559	1.6297
									1960	3.34961	0.919372
									1961	6.42285	2.70319
									1962	3.25586	2.58248
									1963	2.20117	4.69236
									1964	1.05469	2.26601
									1965	0.931641	2.85808
									1966	0.665039	1.65755
									1967	5.75391	3.10041
									1968	3.61914	3.02392
									1969	6.94824	1.51608
									1970	10.6416	3.78822
									1971	0.262695	2.83893
									1972	3.78711	2.76299
									1973	3.43457	5.23659
									1974	10.3564	0.97937
									1975	2.76758	2.38959
									1976	7.15918	3.40732
									1977	2.18262	2.89556
									1978	3.63379	2.27656
									1979	2.81055	3.70646
									1980	10.7451	1.91741
									1981	3.4375	0.59521
									1982	0.009766	2.5873
									1983	0.711914	2.69618
									1984	0.174805	3.55252
									1985	10.7383	3.93852
									1986	7.32812	3.641
									1987	3.42676	0.720057
									1988	3.62402	1.53638
									1989	11.4443	0.506047
									1990	3.44824	2.66805
									1991	11.5068	2.49802
									1992	3.1543	3.39658
									1993	6.29199	2.04646
									1994	3.50586	2.61563
									1995	9.35059	1.02521
									1996	10.3193	1.43854
									1997	0.578125	2.28972
[truncated: 929 more rows]
