# Supplementary material for: Direct translation of climbing fiber burst-mediated sensory coding into post-synaptic Purkinje cell dendritic calcium
Source: eLife. 2020 Sep 28;9:e61593. doi: 10.7554/eLife.61593 (PMC7581426; doi:10.7554/eLife.61593)
Supplement: Figure 4—source data 1. [file elife-61593-fig4-data1.xlsx]

## Sheet: Sheet1
Panel d						Panel e						Panel f
Signal correlation between CF and PC calcium activity						Amplitude correlation between CF and PC						Amplitude correlation between CF and PC
Event number	Paired	Unpaired	Neighbor unpaired	Distant Unpaired			CF - PC pair 1		CF - PC pair 2			Pair number	R squared	Slope
1	0.889228	0.278287	0.547667	0.278287		Pair number	CF	PC	CF	PC		1	0.7562	0.7548
2	0.756136	0.547667	0.503934	0.163693		1	1.56117	2.22327	3.6802	3.4892		2	0.4309	0.3992
3	0.871144	0.503934	0.55951	0.316606		2	1.78042	2.81924	3.6802	3.705		3	0.7783	0.8255
4	0.675684	0.55951	0.204753	0.265927		3	0.817664	2.08196	1.2619	1.6697		4	0.4207	0.5175
5	0.570823	0.163693	0.323613	0.370725		4	4.42635	5.06084	4.1212	2.4081		5	0.2637	0.3048
6	0.540653	0.204753	0.189014	0.187101		5	4.42635	5.06084	4.1212	2.4081		6	0.2486	0.2686
7	0.601936	0.323613	0.651784	0.273294		6	3.99519	2.85326	0.268	0.89824		7	0.2019	0.2768
8	0.889228	0.189014	0.646377	0.236288		7	1.18895	1.64394	2.7218	2.7583		8	0.2996	0.7651
9	0.756136	0.316606	0.660902	0.247375		8	3.50481	3.29066	1.232	1.3551		9	0.6217	1.076
10	0.917587	0.651784	0.40837	0.0907238		9	0.785923	1.43459	2.088	1.2669		10	0.6008	1.012
11	0.86445	0.646377	0.546723	0.258644		10	0.690968	1.16249	0.432	1.5384		11	0.637	0.7282
12	0.665757	0.660902	0.539688	0.221732		11	2.44603	1.33402	2.0884	2.6711		12	0.29	0.4538
13	0.840564	0.40837	0.503934	0.251389		12	0.73031	1.38578	2.0884	2.6711		13	0.658	0.571
14		0.546723	0.560294	0.19422		13	2.0242	1.87335	1.7324	1.4809
15		0.265927	0.55951	0.281964		14	1.80455	1.65226	0.94857	0.98659
16		0.370725	0.20081	-0.009648		15	0.149778	-0.00499055	0.79646	1.2672
17		0.539688	0.323613	0.206503		16	1.997	1.21595	4.019	3.898
18		0.503934	0.214108	0.350511		17	0.381698	0.50705	1.5626	1.5838
19		0.55951	0.189014	0.489861		18	1.20842	0.66109	5.5087	2.6651
20		0.187101	0.682547	0.448252		19	0.58081	1.02692	1.9013	1.0777
21		0.20081	0.53525	0.298032		20	3.1822	3.19658	4.0013	3.3168
22		0.323613	0.672494	0.299745		21	1.62745	1.81217	4.0013	3.3168
23		0.214108	0.413957	0.122578		22	2.84653	2.14068	2.2736	1.5972
24		0.189014	0.443527	0.271353		23	2.84653	2.14068	3.8836	3.2399
25		0.560996	0.410775			24	1.04798	1.48794	3.8836	3.2399
26		0.682547	0.373276			25	0.228729	0.410147	0.79604	0.98036
27		0.53525	0.341003			26	3.7382	3.10848	4.4912	3.4358
28		0.672494	0.51055			27	2.39602	1.7598	3.0995	1.6971
29		0.273294	0.343169			28	0.0374059	0.421893	0.3979	1.6418
30		0.413957	0.357162			29	2.96935	2.15683	0.76005	1.0584
31		0.443527	0.247726			30	2.96935	2.15683	0.94151	0.89681
32		0.410775	0.216431			31	0.241799	0.931731	3.6	2.3527
33		0.373276	0.27472			32	0.984101	1.82893	3.6	2.3527
34		0.341003	0.439985			33	3.3133	3.67326	3.192	2.769
35		0.51055	0.452111			34	3.3133	3.67326	3.192	2.8411
36		0.236288	0.274285			35	0.55227	1.21938	2.4487	1.4939
37		0.247375	0.337362			36	0.17125	0.735969	2.3809	2.4583
38		0.0907238				37	0.266071	0.710153	2.8565	2.5413
39		0.258644				38	2.82599	2.30769	3.2728	3.2422
40		0.221732				39	0.868875	1.06619	1.2167	1.4105
41		0.251389				40	3.06391	2.82879	2.9711	1.9489
42		0.343169				41	1.07346	1.8282	2.5213	1.777
43		0.357162				42	1.4294	1.9607	2.5213	1.777
44		0.247726				43	2.75344	2.33082	4.0061	2.4821
45		0.216431				44	1.90911	1.62448	4.0061	2.5939
46		0.27472				45	0.375963	0.45346	0.52354	0.60441
47		0.19422				46	3.18647	2.45427	0.52354	0.60441
48		0.281964				47	3.18647	2.45427	0.74958	0.76854
49		-0.009648				48	1.08306	1.24214	2.0356	2.1591
50		0.206503				49	0.200056	0.545345	3.0888	2.3392
51		0.350511				50	0.29021	0.821003	1.206	1.1678
52		0.489861				51	1.18495	0.727527	1.1322	0.91509
53		0.448252				52	0.220194	0.418712	2.734	1.3838
54		0.439985				53	2.4475	1.57089	2.734	1.6116
55		0.452111				54	2.4475	1.57089	4.3592	2.9088
56		0.274285				55	1.14961	1.04075	3.1207	2.2824
57		0.337362				56	1.67546	0.832014	3.8046	2.5583
58		0.298032				57	2.5822	1.95752	0.63292	0.50074
59		0.299745				58	2.51165	2.42735	2.2852	1.7362
60		0.122578				59	2.8708	2.94551	1.0142	0.86752
61		0.271353				60	1.97219	1.5441	2.8551	1.6148
						61	1.97219	1.5441	2.8551	1.6148
						62	2.83466	1.36424	1.5076	0.97738
						63	1.4018	1.2195	1.412	1.2028
						64	1.96006	2.07939	2.2538	1.1737
						65	2.45524	2.07939	1.234	1.4073
						66	-0.0255685	0.418712	1.0005	0.89347
						67	0.56894	0.483803	0.73514	0.79609
						68	1.27697	1.65067	0.74218	1.0765
						69	3.16206	2.89057	2.0609	1.5588
						70	0.99237	0.939439	2.1289	2.7552
						71	1.91671	1.8594	2.335	2.7552
						72	2.32014	2.51226	0.87141	1.567
						73	2.92908	2.58347	1.5345	1.4776
						74			0.54895	0.77296
						75			4.0502	1.8737
						76			4.0502	2.3809
						77			0.86109	0.34481
						78			2.48	1.006
						79			1.4602	0.33382
						80			1.4602	0.33382
						81			1.2456	0.40563
						82			0.16275	0.074111
						83			0.59332	1.2808
						84			0.83265	1.2808
						85			2.8296	2.0132
