# Supplementary material for: Direct translation of climbing fiber burst-mediated sensory coding into post-synaptic Purkinje cell dendritic calcium
Source: eLife. 2020 Sep 28;9:e61593. doi: 10.7554/eLife.61593 (PMC7581426; doi:10.7554/eLife.61593)
Supplement: Figure 5—source data 1. [file elife-61593-fig5-data1.xlsx]

## Sheet: Sheet1
panel c
raw duration (ms)							relative duration
Cell	1 stim	3 stim	5 stim	7 stim	9 stim		Cell	1 stim	3 stim	5 stim	7 stim	9 stim
1	8.164	9.568	15.704	17.992	18.408		1	100	117.198	192.357	220.382	225.478
2	4.576	6.812	12.584	18.616	19.812		2	100	148.864	275	406.818	432.955
3	8.528	7.748	13.052	19.188	21.944		3	100	90.8537	153.049	225	257.317
4	5.616	5.772	10.868	16.068	21.008		4	100	102.778	193.518	286.111	374.074
5	2.808	5.72	11.128	17.524	18.824		5	100	203.704	396.296	624.074	670.37
6	3.068	5.2	10.92	16.744	18.876		6	100	169.492	355.932	545.763	615.254
7	8.424	9.412	14.768	17.16	22.256		7	100	111.728	175.309	203.704	264.197
panel d
raw spiklet number							relative spiklet number
Cell	1 stim	3 stim	5 stim	7 stim	9 stim		Cell	1 stim	3 stim	5 stim	7 stim	9 stim
1	6	7	11	11	10		1	100	116.667	183.333	183.333	166.667
2	4	5	7	9	10		2	100	125	175	225	250
3	6	6	9	11	12		3	100	100	150	183.333	200
4	4	5	7	9	11		4	100	125	175	225	275
5	3	5	7	9	10		5	100	166.667	233.333	300	333.333
6	3	4	6	8	9		6	100	133.333	200	266.667	300
7	5	6	7	8	10		7	100	120	140	160	200
panel e
raw amplitude							relative amplitude
Cell	1 stim	3 stim	5 stim	7 stim	9 stim		Cell	1 stim	3 stim	5 stim	7 stim	9 stim
1	0.102329	0.0891202	0.0848058	0.0752663	0.0564076		1	100	133.433	150.344	157.993	181.41
2	0.0495978	0.0447533	0.0362263	0.0365199	0.0282154		2	100	129.432	128.392	158.613	175.782
3	0.0657008	0.055103	0.0403722	0.0360215	0.0238553		3	100	151	169.238	230.988	275.414
4	0.0611929	0.0519481	0.0473329	0.0471095	0.0250259		4	100	188.243	189.135	207.577	244.518
5	0.0413166	0.0272829	0.0355554	0.0220275	0.024981		5	100	88.1768	142.33	109.214	165.392
6	0.0218006	0.0222152	0.0162907	0.0188576	0.0122674		6	100	153.721	132.796	181.091	177.712
7	0.0857593	0.0806405	0.0570104	0.0580523	0.0458873		7	100	126.511	124.24	175.736	186.891
